# Supplementary material for: The Challenge of Regulation in a Minimal Photoautotroph: Non-Coding RNAs in Prochlorococcus
Source: PLoS Genet. 2008 Aug 29;4(8):e1000173. doi: 10.1371/journal.pgen.1000173 (PMC2518516; doi:10.1371/journal.pgen.1000173)
Supplement: Table S2 — Transcripts detected from microarray expression analysis classified as new ncRNAs, asRNAs, small ORFs, pseudogenes and UTR regions of adjacent genes. Capital letters and underlined letters in columns “Sequence 5′end” and “Sequence 3′end” indicate mapped ends and TATA boxes, respectively. Transcript detection included microarray analysis (M), 5′ and 3′ RACE (5′R and 3′R), and Northern hybridization (N). For ORFs that were verified by 5′RACE numbers given in brackets correspond to coordinates of the CDS and numbers without brackets indicate mapped 5′ and 3′ ends. (0.07 MB XLS) [file pgen.1000173.s005.xls]

## Sheet: Tabelle1
probe names	new gene name	class	coordinates	detected by	Sequence 5' end	No. of clones	Sequence 3' end	No.of clones
IG0051r3	PMED4_00502	orf	complement(54068..54310)	M	NT	-	NT	-
IG0057f3-5	PMED4_00571	orf	58826..58963	M	NT	-	NT	-
IG0064f2-4	PMED4_ 00641, PMM0062, psbX	orf	67652..67792	M	NT	-	NT	-
IG0064r2-4	asMED4_00641	asRNA	complement(67629..67875)	M, 5'R	tagactagcattGaccacttttttTctccaaaacttattttttaaggtgcaataaaacacctttatatatagtttacttAaaacttttataaaaactagcG	7/11, 2/11, 1/11, 1/11	NT	-
IG0076r1	asMED4_00771	asRNA	complement(79767..79930)	M, 5'R	tactgtataaaGggacAgataatttactagcttcttgtcgcaattgtctgagggttagactaagtAaA	2/10, 1/10, 3/10, 4/10	NT	-
IG0090r2-3	PMED4_00921	orf	complement(92963..93144)	M	NT	-	NT	-
IG0091f4-5	PMED4_00941	orf	94992..95147	M	NT	-	NT	-
IG0129r2-3		3'UTR of PMM0127 (PMED4_01331)	complement(124336..124647) [complement(124573..124932)]	M, 5'R, 3'R	TcaaaagagcatagattagAgttGcttgaaaaaaataatatcgaacagAataaacA	1/7, 1/7, 3/7, 1/7, 1/7	TaagcgTtcatagacaggcatagtcgcccaaAttacaaatatccctcttggaaaacacataaaaaaacacattttatggggtcatttttTaT	1/7, 1/7, 1/7, 1/7, 3/7
IG0153f2		5'UTR of PMM0150 (PMED4_01561)	146780..146804	M	NT	-	NT	-
IG0221f1-4	PMED4_02251, PMM0219	orf	214133..214315	complement (225780..225804)	NT	-	NT	-
IG0230f0	asMED4_02331	asRNA	223722..223828	M, 5'R	taaaattttaatA	5/5
IG0232r1		IG of operon PMM0231 (PMED4_02361) and PMM0232 (PMED4_02371)	complement (225780..225804)	M	NT	-	NT	-
IG0272f0	asMED4_02731	asRNA	258538..258669	M, 5'R	tatgataaatagG	4/4	NT	-
IG0272r1		5'UTR of PMM0268 (PMED4_02731)	complement (258570..258772) [complement(258236..258604)]	M, 5'R	taagatatataaA	3/3	NT	-
IG0321f0-1	asMED4_03211	asRNA	302065..302662	M, 5'R	ctacctgttcgaCatgaccagttaaaccatatggatctgaaatccaaatgccgacattcgcgcaatgaaaagctccaaatccaaagcaagtaatacctgataagagaagatgaatcccaaatatccttgggagatcaagagcaggttctccagttctttcatcttcccatagatctaaatcccaatatgtccaatgccagattgaagcaagcattaaaagtccactaaaaacaatgtgagcggctgcaacaccttcgaagctccagaatcctggatcaacccctgtagcaccagtT	3/7, 4/7	NT	-
IG0334f3-12		5'UTR of 16s RNA	312599..313050	M	NT	-	NT	-
IG0335f0-3		IST, operon 16s RNA and 23 s RNA	314526..314639	M	NT	-	NT	-
IG0335r0-2	as_RNA_38	asRNA	complement(314574..314884)	M, 5'R	ataaaataggaaG	6/6	NT	-
IG0337f0-5		IST, operon 16s RNA and 23 s RNA	314810..315058	M	NT	-	NT	-
IG0338f0-3		IG of operon tRNA Gly and tRNA Val	317979..318011	M	NT	-	NT	-
IG0346f10-11	asMED4_03431	asRNA	324060..324207	M, 5'R	tatattagctttcG	3/3	NT	-
IG0346r4-10	PMED4_03431 PMED4_03441	2 orfs in operon	complement(324070..324471) [complement(324090..324233)] [complement(324355..324456)]	M, 5'R, 3'R	gaaaattgaaatActaacgataaagccatgcttacaatttctgaaAttcT	11/13, 1/13, 1/13	AcagtaaTatttattctgGggaaacagaacaactttatttaaaaatgaaagaaggGtggctTtaAtctcCtccactattgaaatA	1/11, 3/11, 1/11, 1/11, 1/11, 2/11, 1/11, 1/11
IG0348f10	PMED4_03462	orf	325997..326110	M	NT	-	NT	-
IG0349f8	PMED4_03491	orf	326727..326924	M	NT	-	NT	-
IG0350f2-3	PMED4_03501, PMM0338	3'UTR + PMM0338 (PMED4_03501)	327102..327469 [327021..327320]	M, 5'R	AgggaaactcgccttcagctagttttaaaagctttattaactattggggatttaccagatcaactgcaagcagcaatggtggtaggggtttgtgccgaaatggataaaagcgattttgaAaatgctgatggtaattccaatactaaagaagagagtaattcCacttccgttgatacttctactggaagaaAagtttttagA	1/7, 1/7, 1/7, 1/7, 3/7	NT	-
IG0350r2-4	PMED4_03511	orf	complement(327340..327543)	M	NT	-	NT	-
IG0354f5		3'UTR + PMM0342 (PMED4_03561)	330553..330881 [330341..330625]	M, 5'R	TgatactaaaagaagcaaatatgaagaatccaaagacgtaattgaTaccgattcaAttcctctagatgattaatattttaagctagtcaaatcccagaaataattctttgtgtactacaagaacatcaaataaagatgttccatgggaaggacttattggaatattatctacatttaatgcctctgcacaaattagatggccatcccatcttgtattatgttcactC	1/4, 1/4, 1/4, 1/4	NT	-
IG0354r3	PMED4_03571	orf	complement(330635..331153)	M	NT	-	NT	-
IG0367f11-17	Yfr8	ncRNA	339952..340249	M, 5'R, N	taatttataaatG	19/19	NT	-
IG0367r2-5	Yfr9	ncRNA (potential orf)	complement(339886..340176)	M, 5'R, N	tataatacatatA	6/6
IG0371f5-6	PMED4_03841	orf	343484..343627	M	NT	-	NT	-
IG0375f11		pseudogene	346124..346398	M, 5'R	tattattatttcCtG	1/2, 1/2	NT	-
IG0375f18-20	Yfr10	ncRNA	346661..346819	M, 5'R, 3'R; N	taatgtaataatA	4/4	ATggCatA	5/11, 2/11, 3/11, 1/11
IG0375f21-22	Yfr2	ncRNA	346828..346921	M	NT	-	NT	-
IG0375r18	PMED4_03891	orf	complement(346297..346425)	M	NT	-	NT	-
IG0380f14-17	PMED4_03965	orf	350288..350523 [350362..350514]	M, 5'R	taaatcctaaaaTaattgtttattaaatatctattagatatgagatcttttatctcgaataactagatcctctataaG	1/6, 5/6	NT	-
IG0380f38	asMED4_04001	asRNA	351488..351591	M, 5'R, (N)	taaagtagtaaaA	6/6	NT	-
IG0380r22	PMED4_03981	orf	complement(350803..350988)	M	NT	-	NT	-
IG0380r26	PMED4_03991	orf	complement(351016..351174)	M	NT	-	NT	-
IG0380r37-44	PMED4_03963 PMED4_03964	5' + 3' UTR + 2 orfs	complement(350167..350524) [complement(350136..350291)] [complement(350325..350426)]	M, 5'R	tataaataaagtG	8/8	NT	-
IG0380r47-51	PMED4_03961 PMED4_03962	2 orfs	complement(349763..350070) [complement(349839..349958)] [complement(349962..350051)]	M, 5'R, 3'R, N	tattaattaAgtagatacttttttttatttaatgccaT	5/8, 3/8	TTttgatcctttagtcatgcaaattagagataaaatttaattctcaaactttaggcttgctgttaaacatagCtgtctGtaTtttggTaT	1/11, 1/11, 3/11, 1/11, 1/11, 3/11, 1/11
IG0389f2	asMED4_04101	asRNA	358027..358183	M, 5'R	gctcataagaatCattgctttatgttcattaactttgattatctccagctcagaacaaaaaacgtatccttgttctttatctactttttT	4/5, 1/5	NT	-
IG0390r20-22	Yfr11	ncRNA	complement(358606..358754)	M, 5'R, 3'R; N	taatttctagttA	4/4	AgttcaAccTctttTtTG	1/8, 2/8, 1/8, 1/8, 2/8, 1/8
IG0390r3-4	PMED4_04151	orf	complement(359485..359610)	M	NT	-	NT	-
IG0392f2	PMED4_04181	orf	360659..360871	M	NT	-	NT	-
IG0398r0		3'UTR of tRNA Thr	complement (368323..368347)	M	NT	-	NT	-
IG0418f17	Yfr4	ncRNA	383389..383483	M	NT	-	NT	-
IG0418r14-17	PMED4_04461	5' UTR + orf	complement(382777..382997) [complement(382777..382919)]	M, 5'R	ataatagatatcA	3/3	NT	-
IG0430f2-6	asMED4_04601	asRNA	395661..395842	M, 5'R, 3'R	cttgaagaagcgTcatccattctattggtgtatA	7/10, 3/10	CTcgaactgcgccttCtaaagA	1/5, 1/5, 1/5 2/5
IG0430r0-7	PMED4_04601	5' UTR + orf	complement(395600..395985) [complement(395600..395797)]	M	NT	-	NT	-
IG0436f3-4	PMED4_04671	orf	401765..401968	M	NT	-	NT	-
IG0466f0-5	PMED4_05001	5'UTR + orf	432366..432614 [432435..432614]	M	NT	-	NT	-
IG0512r1-2		5'UTR of PMM0496 (PMED4_05451)	complement (470232..470559) [complement(469063..470253)]	M, 5'R, 3'R	tagtattggattG	4/4	TtcaaaaattgatctgccagtCtgagaaatcctaagactttttactttaggtaatctataacactatttaaatttttcaacaattaaaaaaaaactttatctaaacacaatttttgtgagttagttcttctaatctttaaggcaaacttttactactaagtgtataaattCgtcttaattaaatttttgCctagttaaattcatcgtagaaaggagtccactatgtgtccagccgcaacagaaT	1/5, 1/5, 1/5, 1/5, 1/5
IG0516r2		5'UTR of PMM0500 (PMED4_05491)	complement(475255..475535) [complement(474834..475364)]	M, 5'R	tataatgagtttG	3/3	acactatttaaatttttcaacaattaaaaaaaaactttatctaaacacaatttttgtgag	-
IG0642r8	PMED4_06761	orf	complement(596195..596371)	M	NT	-	ttagttcttctaatctttaaggcaaacttttactactaagtgtataaattcgtcttaatt	-
IG0668r5	Yfr13	ncRNA	complement(621599..621701)	M, 5'R, 3'R, N	tataaattaattG	9/9	aaatttttgcctagttaaattcatcgtagaaaggagtccactatgtgtccagccgcaaca	2/14, 2/14, 1/14, 1/14, 1/14, 2/14, 4/14, 1/14
IG0668r5	Yfr13 + PMED4_07031 + PMED4_07041	operon containing Yfr13, PMM0653 (PMED4_07031) and PMED4_07041	complement (621582..622025) [complement(621167..621544)] [complement(621890..622279)]	M, 5'R, 3'R	TgacattTgccagggaTtagaagataacggctgtaatgttacgactaaaccaaAaacgatgaaaaacagcacaactgttcttgcatttgttgaagatcctgatggatataagattgaacttattgaaagagattagttatggcaatttctgaattaaatgaagaTacacaggatcaaatatgtgatcttcttgaaaatTtgcagcaaatagagaaacttaaaaataaagatatgcgtattttgttagataaaatagttagacagtatggaggaaaagtagtaaataaataggttggtttctaattattttgctataaattaattGaggccaaacctcaatgagtT	1/18, 1/18, 1/18, 3/18, 1/18, 1/18, 9/18, 1/18	gaat	2/14, 2/14, 1/14, 1/14, 1/14, 2/14, 4/14, 1/14
IG0668r5	PMED4_07031	orf	[complement(621736..621887)]	M, 5'R	gactaaaccaaA	3/3	NT	-
IG0672f5	PMED4_07082	orf	623897..624037	M	NT	-	NT	-
IG0676f16-17		pseudogene	627525..627595	M	NT	-	NT	-
IG0676f22-24	Yfr14	ncRNA	627811..628062	M, 5'R,N	taagttaattctGtatgctgttttttTG	1/7, 1/7, 5/7	NT	-
IG0676f30-32	PMED4_07151	orf	628184..628378	M	NT	-	NT	-
IG0676r2		3' UTR of PMM0660 (PMED4_07161)	complement (628254..628577) [complement(628383..628646)]	M, 5'R	GtgcttaggaaaagaAatacagaagaatcaatattagaatttgaagagaaatttaactctagaaacgaaaaaaatctacatatttatatatgtagatttcttaaaaatagatctatATctcgagctttagcttcTaagtggctaattacaatgattaaC	1/6, 1/6, 1/6, 1/6, 1/6, 1/6	NT	-
IG0676r28-31	PMED4_07131	5'+3' UTR+ orf	complement (626840..627046) [complement(626920..627024)]	M, 5'R	ataatataaactA	6/6	NT	-
IG0676r9-12	Yfr6	ncRNA (potential orf)	complement(627729..627972) [complement(627774..627875)]	M	NT	-	NT	-
IG0700f1-3	Yfr7	ncRNA	652625..652844	M	NT	-	NT	-
IG0701f10-16	PMED4_07431	5'+3' UTR + orf	653649..654005 [653669..653791]	M, 5'R	ttatgcttaaatAtctttAagttctT	1/13, 11/13, 1/13	NT	-
IG0701f3-8	PMED4_07421, PMM0685	orf	653377..653607	M	NT	-	NT	-
IG0701r16	asMED4_07401	asRNA	complement(653119..653401)	M, 5'R, 3'R	taaaatcgaagtA	5/5	TgCTggttctcctA	4/8, 2/8, 1/8, 1/8
IG0701r2-14	PMED4_07432	5'+3' UTR + orf	complement(653397..653981) [complement(653818..653964)]	M, 5'R	tacgtttgaaatAagagttgaactttattatgtttacaaatTatctgcctagtgagatggtgacggtcttagaggtaacaacgatgttttcattcttagttgggacaatattagttatgttgtttacatcagatcaggctaAtAaAaagaatctatatttgaagaaagccaaataactaaacataaagattaggcaaatatattaactaatagaagttgattgagccctagcttcaaatttattttttatgaaattaaaaataaaaataaggActgggaTatgggctagtccaccaataattactttagtttctgaataaggcatttagaatgtaataagaacttaaagatatttaagcataaaatatatttatcaatgctttttgttaagcagcttca…	4/13, 1/13, 1/13, 1/13, 1/13, 1/13, 1/13, 2/13, 1/13	NT	-
IG0702r18-21	Yfr15	ncRNA	complement(654334..654562)	M, 5'R, N	tatagttttactAaaccaagtgtttccttgtttccactgtttcagtaaaacttctcctacacacatatataacatatacaagaTattttttttcgtggatattgatgagtattgttacttAttggttatatgctgaaaaAagtAattcaccaAgtatttactattttttatgtcT	4/11, 1/11, 1/11, 2/11, 1/11, 1/11, 1/11	NT	-
IG0703f2-7	asMED4_07481	asRNA	655649..656062	M, 5'R	taatgtatttagtA	8/8	NT	-
IG0703r7-9	PMED4_07481	orf	complement(655765..655920)	M	NT	-	NT	-
IG0704f25-26	PMED4_07522	orf	657730..657891	M	NT	-	NT	-
IG0704f6	asMED4_07511	asRNA	656732..656919	M, 5'R	agttttaataattGtAaatAtC	4/7, 1/7, 1/7, 1/7	NT	-
IG0704r24-25	Yfr16	ncRNA	complement(657392..657529)	M, 5'R, 3'R, N	atactaactttgaAttA	1/8, 7/8	GGttgattactaaAgtcagTAgtcaatcttttttT	1/8, 1/8, 1/8, 2/8, 1/8, 2/8
IG0704r38	PMED4_07511	orf	complement(656770..656943)	M	NT	-	NT	-
IG0708r4	PMED4_07611	orf	complement(660634..660837)	M	NT	-	NT	-
IG0710f2-3	PMED4_07632	orf	661987..662130	M	NT	-	NT	-
IG0714f13	Yfr17	ncRNA	664667..664930	M, 5'R, N	ctaagatctaggAaaaccaactttgatcttatcgttcctaaaagaattccgcgtgacattttttacaaaaaagcttatatTttatttCG	7/15, 1/15, 1/15, 6/15	NT	-
IG0718f3	PMED4_07751	orf	667052..667189	M	NT	-	NT	-
IG0719f3	PMED4_07771	orf	667745..667876	M	NT	-	NT	-
IG0730r5-7	PMED4_07891	orf	complement(680881..681087)	M	NT	-	NT	-
IG0735f2-5		pseudogene	683786..684008	M, 5'R	ctactattcccactA	4/4	NT	-
IG0735r5-6	PMED4_07951	5'UTR + orf	complement (684060..684243) [complement(684046..684228)]	M, 5'R	gggaatataaagA	4/4	NT	-
IG0741f5-9	PMED4_08021	orf	688794..689078 [688929..689078]	M	NT	-	NT	-
IG0751f9	PMED4_08141	orf	699100..699306	M	NT	-	NT	-
IG0751r12-14	PMED4_08151	orf	complement(699336..699521)	M	NT	-	NT	-
IG0818r4	PMED4_08892	orf	complement(762769..762891)	M	NT	-	NT	-
IG0821f4	PMED4_08922	orf	764600..764791	M	NT	-	NT	-
IG0825r6-7	PMED4_08991	orf	complement(769026..769184)	M	NT	-	NT	-
IG0829r20	PMED4_09041	orf	complement(771996..772190)	M	NT	-	NT	-
IG0829r4-6	PMED4_09061	3'UTR + orf	complement(772757..772966) [complement(772787..772966)]	M	NT	-	NT	-
IG0833r3-5	PMED4_09111	orf	complement(774177..774344)	M	NT	-	NT	-
IG0866f1	PMED4_09461	orf	808860..808937	M	NT	-	NT	-
IG0872f6	PMED4_09541	orf	813844..814002	M	NT	-	NT	-
IG0873r10-14	PMED4_09591	orf	complement (815087..815259) [complement(815085..815243)]	M, 5'R	tataataaaaatA	5/5	NT	-
IG0874f7	PMED4_09621	orf	816334..816450	M	NT	-	NT	-
IG0875f11-16	PMED4_09661	orf	817404..817568	M	NT	-	NT	-
IG0875f23	PMED4_09671	orf	817771..817920	M	NT	-	NT	-
IG0876f2		3'UTR of tRNA	818172..818387	M	NT	-	NT	-
IG0878f4	PMED4_09711	orf	819489..819632	M	NT	-	NT	-
IG0975f1		3'UTR of tRNA	914442..914589	M	NT	-	NT	-
IG0977r2-4	PMED4_10691	orf	complement(916071..916196)	M	NT	-	NT	-
IG0977r7	PMED4_10681	orf	complement(915907..916041)	M	NT	-	NT	-
IG1003f4-6	PMED4_11011	orf	939188..939409	M	NT	-	NT	-
IG1003f9	PMED4_11021	orf	939444..939668	M	NT	-	NT	-
IG1015f5-6	PMED4_11171	3'UTR + orf	947821..948015 [ 947821..947976]	M	NT	-	NT	-
IG1016f5-6	PMED4_11201	orf	948650..948766	M	NT	-	NT	-
IG1016r4		3'UTR + PMM0997 (PMED4_11211)	complement(948575..949034) [complement(948798..949064)]	M, 5'R	TtaattaaaataacttcTctcaaagctactacattttttcttT	1/3, 1/3, 1/3	NT	-
IG1017r4-5	PMED4_11221	orf	complement(949170..949307)	M	NT	-	NT	-
IG1047f13	PMED4_11691	orf	972756..972895	M	NT	-	NT	-
IG1047f9	PMED4_11681	orf	972438..972584	M	NT	-	NT	-
IG1047r16	Yfr5	ncRNA	complement(972088..972176)	M	NT	-	NT	-
IG1054f8-13	PMED4_11782	5'+3'UTR + orf	979896..980215 [979969..980115]	M, 5'R, 3'R, N	taatttgtgattG	5/5	AaagttcaattctagagtctttgccccAGtT	1/5, 2/5, 1/5, 1/5
IG1054r19	PMED4_11781	orf	complement(979511..979684)	M	NT	-	NT	-
IG1137r3	PMED4_12631, PMM1117, psbY	5'UTR + orf	complement (1063576..1063698) [complement(1063576..1063692)]	M	NT	-	NT	-
IG1142r10	PMED4_12681	orf	complement(1070174..1070341)	M	NT	-	NT	-
IG1142r19-25	Yfr21	ncRNA	complement(1069553..1069757)	M, 5'R	taaagtcttaattG	4/4	NT	-
IG1143r0-1144r2-3		3'UTR + PMM1123 (PMED4_12701)	complement(1071387..1071743) [complement(1071671..1072375)]	M, 5'R	GaataaAaatttggtttcgggaattttaattggtattggagcagccttttcAtgggttgcacttattgattaataagagttctaaaattttttgggaacaacctaattgatggaattgtcaataaaaggcactagaaaagtaatccacgaC	1/4, 1/4, 1/4, 1/4	NT	-
IG1144f2		3'UTR of tRNA	1071431..1071613	M	NT	-	NT	-
IG1148f1	PMED4_12742	orf	1077697..1077921	M	NT	-	NT	-
IG1149f1-3	asMED4_12751	asRNA	1078498..1078920	M, 5'R	TgAtcttcttccgaacctTcgaataaatagatttGattatttttcatagtgttgcccctagatttaaaactctT	1/5, 1/5, 1/5, 1/5, 1/5	NT	-
IG1153r5-10	PMED4_12832	5'+3' UTR + orf	complement(1081790..1082064) [complement(1081928..1082041)]	M, 5'R	tttcatagatatA	4/4	NT	-
IG1157f2		3'UTR of PMM1135 (PMED4_12891)	1085656..1085988 [1085656..1085862]	M	NT	-	NT	-
IG1157r3	PMED4_12901	orf	complement(1086220..1086435)	M	NT	-	NT	-
IG1157r8	Yfr19	ncRNA	complement(1086081..1086162)	M, 5'R, N	taagctataaaaG	10/10	NT	-
IG1159f12	PMED4_12951	orf	1087775..1087933	M	NT	-	NT	-
IG1159f7-10	PMED4_12941	orf	1087629..1087772	M	NT	-	NT	-
IG1173r2-4	PMED4_13101	orf	complement(1103247..1103459)	M	NT	-	NT	-
IG1174r1	PMED4_13121, petM	orf	complement(1104533..1104646)	M	NT	-	NT	-
IG1185f8-14	PMED4_13271	5'+3'UTR + orf	[1115529..1115684] 1115464..1115769	M	NT	-	NT	-
IG1279r9		5'UTR of tRNA	complement (1208565..1208692)	M	NT	-	NT	-
IG1299f7		5'UTR + PMM1277 (PMED4_14431)	1229057..1229205 [1229071..1229205]	M	NT	-	NT	-
IG1322f1		3'UTR + PMM1300 (PMED4_14661)	1252450..1252633 [1251103..1252476]	M, 3'R	NT	-	TgccgccgttagtaccgaaagcagtgaaaaT	2/2, 2/2
IG1322r8-10	PMED4_14671	orf	complement(1252499..1252728) [complement (1252592..1252711)]	M, 5'R	tatatttcttagtAatgcttataaaaaattatgtcaggaatcaaaacaaaaaataatactcaaAaattatcatttaggTtaGctccAtatttatttatAgcagtagctattttcactgctttcggtactaacggcggcacatgggtatgaatgatttAaaA	3/12, 1/12, 3/12, 1/12, 1/12, 1/12, 1/12, 1/12
IG1389r2	PMED4_15322	orf	complement(1311169..1311303)	M	NT	-	NT	-
IG1393r3	PMED4_15371	orf	complement(1314269..1314397)	M	NT	-	NT	-
IG1397f8-12	PMED4_15421	3'UTR + orf	1318031..1318252 [1317859..1318095]	M, 5'R	AcgcaaaggccgaaaggagaagaaagttagaaagtttataTcCgaatC	1/4, 1/4, 1/4, 1/4	NT	-
IG1398f2-6	PMED4_15442	5'+3' UTR + orf	1319590..1319831 [1319606..1319722]	M, 5'R	taaaataatcttA	4/4	NT	-
IG1398r3	PMED4_15451	orf	complement(1319724..1319858)	M	NT	-	NT	-
IG1399f16	PMED4_15491	orf	1321009..1321188	M	NT	-	NT	-
IG1399f28-29	PMED4_15511	orf	1321721..1321885	M	NT	-	NT	-
IG1399f3	PMED4_15471	orf	1320346..1320516	M	NT	-	NT	-
IG1399r26	PMED4_15481	orf	complement(1320587..1320769)	M	NT	-	NT	-
IG1405f15-17	PMED4_15621	orf	1327194..1327352	M	NT	-	NT	-
IG1405f20-21	PMED4_15631	orf	1327345..1327494	M	NT	-	NT	-
IG1405f7-10	PMED4_15611	orf	1326778..1326984	M	NT	-	NT	-
IG1405r20-23	PMED4_15601	orf	complement(1326498..1326650)	M	NT	-	NT	-
IG1406f15	PMED4_15652	orf	1329124..1329255	M	NT	-	NT	-
IG1406r13		3'UTR of orf PMED4_15651	complement (1328701..1328928) [complement(1328782..1328928)]	M	NT	-	NT	-
IG1408f2	PMED4_15681	orf	1330836..1330967	M	NT	-	NT	-
IG1409r3-6	asMED4_15701	asRNA	complement(1332438..1332603)	M, 5'R, 3'R	tatattgataactG	8/8	TgtctccgctCataaCtaCaaAaatAgGAtC	1/12, 1/12, 1/12, 4/12, 1/12, 1/12, 1/12, 1/12, 1/12
IG1410f15-22	PMED4_15721	3'UTR + orf	1334314..1334504 [1334314..1334448]	M, 5'R	AcaaaaagtatgcAgatttAttgcatcaagcatctaaggcaaccggtagaaaagaagcggtaggtttattgcataaggcggcaaaacttcaAactaaA	1/5, 1/5, 1/5, 1/5, 1/5	NT	-
IG1410r21	PMED4_15712	orf	complement(1333383..1333547)	M	NT	-	NT	-
IG1410r2-4	asMED4_15721	asRNA	complement(1334333..1334537)	M, 5'R, 3'R	GttgtagattatttagctgcatttctgttacattaatgtcCAaaacGtttctaagcctctatttttgactaggaattA	3/9, 1/9, 3/9, 1/9, 1/9	CgcttcttttctaccggttgccttagatgcTtgAtgcaatAaatcTgcataCT	1/14, 3/14, 4/14, 1/14, 2/14, 1/14, 2/14
IG1412f10-11	PMED4_15762	orf	1335365..1335481	M	NT	-	NT	-
IG1412f13-17	PMED4_15771	3'UTR + orf	1335506..1335706 [1335506..1335655]	M	NT	-	NT	-
IG1412f30-33	PMED4_15791	ncRNA + orf	1336173..1336471 [1336192..1336326]	M, 5'R	AaGaaaTtttggctacaaaatgagagtaAAactTgaacctgaaacagcttttataggtaaaaaattTgcatatatTtttctaggtataAtatttgctcTtaattCAATagT	5/20, 1/20, 2/20 , 1/20 ,1/20 ,1/20 ,1/20, 1/20, 1/20, 1/20, 1/20, 1/20 , 1/20, 1/20, 1/20 , 1/20, 1/20, 1/20, 1/20	NT	-
IG1412f32-33	Yfr20	ncRNA	1336435..1336523	M, 5'R, N	tataataaaagcA	5/5	NT	-
IG1412f40	PMED4_15792	orf	1336734..1336835	M	NT	-	NT	-
IG1412f6	PMED4_15761	orf	1335158..1335271	M	NT	-	NT	-
IG1412r33	asMED4_15771	asRNA	complement(1335589..1335723)	M, 5'R	TttaatttagaataaatctAttaaaaatcaatctgcaaaatT	1/4, 2/4, 1/4	NT	-
IG1413f5-6		pseudogene	1338688..1338765	M	NT	-	NT	-
IG1422r3-6	PMED4_15921	3'UTR + orf	complement (1344631..1344840) [complement(1344661..1344840)]	M	NT	-	NT	-
IG1427r6	PMED4_15981	orf	complement(1346701..1346847)	M	NT	-	NT	-
IG1428f2	PMED4_16001	orf	1347450..1347623	M	NT	-	NT	-
IG1429f21-24	PMED4_16031	orf	1349117..1349317	M	NT	-	NT	-
IG1429f3-4		3'UTR of PMM1402 (PMED4_16011)	1348089..1348386 [1347829..1348188]	M, 5'R, 3'R	AaataagctagaagagaTtgaaaaaaaagcagaagatgtaaaagaaaAagtgaaGaaGAAacagaaagaCaagaaaA	1/9, 1/9, 1/9, 1/9, 1/9, 1/9, 1/9, 1/9, 1/9,	gaggtgcatgaCttGAaG	1/4, 1/4, 1/4, 1/4
IG1429r11-19	PMED4_16021	3'UTR + orf	complement(1348447..1348770) [complement(1348681..1348830)]	M, 5'R	AgatcagaAaAtattttatggctacaggaaaagattaaA	1/4, 1/4, 1/4, 1/4	NT	-
IG1429r4-6	asMED4_16031	asRNA	complement(1349017..1349248)	M, 5'R	taaacttgaaatA	4/4
IG1430r2		3'UTR of orf PMM1404, hli5, PMED4_16051	complement (1350105..1350368) [complement(1350213..1350368)]	M	NT	-	NT	-
IG1437r11-16	PMED4_16131 PMED4_16122 PMED4_16121	orf1 orf2 orf3	complement(1353430..1353606) complement(1353269..1353433) complement(1353048..1353278)	M	NT	-	NT	-
IG1438r5	PMED4_16161	orf	complement(1354331..1354444)	M	NT	-	NT	-
IG1442f4	PMED4_16202	orf	1357119..1357266 [1357133..1357237]	M, 5'R, 3'R	gataataaatttA	3/3	TgcTtcggtaaatcaaA	1/3, 1/3, 1/3
IG1443f7-9	asMED4_16221	asRNA	1360031..1360274	M,5'R	AtaagcatatttgtacattttcctataatcatcatGcaatctttcagttgctaactttctattttccattccatctctaatcaaatccatttcatggaagttttgA	1/5, 3/5, 1/5	NT	-
IG1451f8-15	PMED4_16312	orf	1364631..1364789	M	NT	-	NT	-
IG1451r5-8	PMED4_16321	orf	complement(1364812..1365033)	M	NT	-	NT	-
IG1453f2-10	PMED4_16351, PMM1427	3'UTR + orf	[1367126..1367356] 1367126..1367550	M	NT	-	NT	-
IG1455f2-5	asMED4_16371	asRNA	1368187..1368662	M, 5'R	TatataaagccttgtgagatccctattttgaaatcctttttgcatcaaaaagccagcaattgctgcttgtaagattctatattgatcccaattaggatGttcctcaacaaatttattcatagcttgttgaaggttttcatgaaggtcacatttaA	1/3, 1/3, 1/3	NT	-
IG1463r2		5'UTR of PMM1437 (PMED4_16461]	[complement(1375326..1375637)]complement (1375326..1375765)	M	NT	-	NT	-
IG1526f2-3		5'UTR of PMM1501 (PMED4_17111)	1439728..1440436	M, 5'R, N	CaaCtttcttttttgggatttcaggttgaaacttattttcttcattaatagctaaatatacTaatccttgataagtaccattttgaagtgtttctcctgttctcccagtcatcacattagtatcgacataaacaggataaaccggatcggttacggcaattaaattatcactcccaagaatatctaaaatattgctactatcgcattttgaaccatcagaaacaaatatttcttccgatgagatttgacaccctcttgaaataaaatcatttacagaaattttttccctaagccatccatatccttgctctgggccgtaacctttaaatccgttatttgttcccatttcatttaatgcttcgcccatagctttaacacaagctttaggtagcggctccg…	1/12, 1/12, 1/12, 5/12, 4/12	NT	-
IG1534f1-3	asMED4_17181	asRNA	1447331..1447687	M, 5'R	TccatttgagctgcaccagtgatcatgtttttcacataatcagcgtgacctggacagtcaacgtgtgcataatgtctttcggcTgtttcgtattcaacgtgtgcagtattaattgtaatAccacgctctctttcttctggagcaCcatcgatgtctccatagtcttgagcttgtgcttgaccttttttagctaaaacAttagtAatAgcagcAgtcagggttgtttttcCatgatcaacgtggccaatagtacctatgttgacatG	1/14, 1/14, 2/14, 1/14, 2/14, 2/14, 1/14, 2/14, 1/14, 1/14	NT	-
IG1549f1	asMED4_17331	asRNA	1463785..1464156	M, 5'R	tataagcctgaatA	5/5	NT	-
IG1585r2-5		5'UTR of PMM1558 (PMED4_17681)	[complement(1486962..1487615)] complement (1486962..1487817)	M	NT	-	NT	-
IG1616f1		3'UTR of tRNA	1516866..1517026	M	NT	-	NT	-
IG1616f7	asMED4_17971	asRNA	1517214..1517307	M, 5'R	taagctaaaaaaG	6/6	NT	-
IG1616r2	PMED4_17971, PMM1587	orf	complement(1517250..1517411)	M	NT	-	NT	-
IG1637f1-3	asMED4_18171	asRNA	1537773..1537988	M, 5'R	tcaattatattgAatAAaattaagtAtttaataagaCaT	1/8 , 2/8, 2/8, 1/8, 1/8, 1/8	NT	-
IG1642r1	PMED4_18221, PMM1612	orf	complement(1543322..1543537)	M	NT	-	NT	-
IG1738r2	PMED4_19191	orf	complement(1646199..1646387)	M	NT	-	NT	-
