# Supplementary material for: The Challenge of Regulation in a Minimal Photoautotroph: Non-Coding RNAs in Prochlorococcus
Source: PLoS Genet. 2008 Aug 29;4(8):e1000173. doi: 10.1371/journal.pgen.1000173 (PMC2518516; doi:10.1371/journal.pgen.1000173)
Supplement: Table S3 — Differential expression of asRNAs and their sense transcripts during light, phage and phosphorus stress. asRNAs were named with the prefix “as” according to the gene ID found at www.microbesonline.org for the respective gene they are overlapping with. Microarray ratios are average values ± standard errors of all probes targeting the respective asRNA and its sense transcript for biological triplicates. (0.10 MB XLS) [file pgen.1000173.s006.xls]

## Sheet: summary
light experiment		fold change						± standard error
probes	gene name	HL-dark	WL-dark	Blue-dark	Red-dark	Green-dark	DCMU-WL	HL-dark	WL-dark	Blue-dark	Red-dark	Green-dark	DCMU-WL
MED4_IG_0064r0-4	asMED4_00641	-1.34841	-1.30153	-1.0835	-1.0253	-1.03903	1.25021	1.26901	1.23087	1.32748	1.36019	1.25766	1.32366
MED4_IG_0064f3-5	PMED4_00641, PMM0062, psbX	-1.6533	-1.21709	-1.12056	1.26277	1.2363	1.14365	1.48361	1.48007	1.42797	1.46018	1.36254	1.37363
MED4_IG_0076r0-1	asMED4_00771	1.00724	-1.07164	1.1027	-1.01997	-1.08751	1.07022	1.17114	1.1616	1.23247	1.16184	1.1501	1.17139
MED4_ARR_0074_0-13	PMED4_00771, PMM0075	1.7578	1.50553	2.03851	1.16017	1.23884	-1.17798	2.02458	1.43249	1.76248	1.78051	1.62151	1.4334
MED4_IG_0230f0-2	asMED4_02331	-1.05643	-1.05961	1.01441	-1.01091	-1.02223	-1.03411	1.16981	1.2074	1.29852	1.28771	1.21058	1.17065
MED4_IG_0230r2-4,MED4_ARR_0226_0-10	PMED4_02331, PMM0228, psbO	-1.96982	1.27216	-1.20856	1.13082	1.28073	-1.07204	3.71437	2.06192	2.09744	3.86138	2.05858	1.85779
MED4_IG_0272f0-3	asMED4_02731	1.14092	-1.13352	1.05884	1.20948	-1.18031	1.23538	1.50105	1.33265	1.27096	1.43308	1.29576	1.48313
MED4_IG_0272r1-3,MED4_ARR_0266_0-9	PMED4_02731, PMM0268	1.46233	1.51852	1.2685	1.245	-1.02529	1.02813	2.63631	1.69635	1.85571	2.19832	1.70755	1.87204
MED4_IG_0321f0-1	asMED4_03211	-1.10392	-1.04715	1.01912	-1.08868	1.08132	1.02177	1.30881	1.15146	1.139	1.28007	1.20955	1.11515
MED4_ARR_0313_0-18,MED4_IG_0321r4	PMED4_03211, PMM0315, psbB	-1.77275	1.11982	-1.17417	1.07367	1.2095	1.0059	2.65215	1.88179	1.98118	3.07541	1.85555	2.32157
IG0335r0-2	as_RNA_38	-1.15768	-1.83901	-1.33476	-1.1942	-1.24567	1.8398	1.44781	1.63126	1.57457	1.79086	1.51864	1.50919
RNA0011_0-10,MED4_IG_0335f1-3 ,MED4_ IG_0337f0-1	RNA_38	-1.07233	-1.03175	-1.03707	1.09239	-1.22224	-1.16213	2.36315	1.82154	1.7741	1.85751	1.6564	2.73928
MED4_IG_0346f9-12	asMED4_03431	-1.17372	-1.10608	1.02259	-1.05099	-1.05968	1.08988	1.37674	1.35679	1.35265	1.4989	1.43273	1.22904
MED4_IG_0346r3-10	PMED4_03431	-3.45363	-2.11677	-2.78115	-2.02918	-1.05791	1.8989	2.50395	1.73932	1.88567	2.15477	1.63392	1.74611
MED4_IG_0380f38	asMED4_04001	-1.10182	-1.08039	1.12547	1.17988	1.19577	-1.02822	1.21067	1.17451	1.27359	1.21415	1.19011	1.19982
MED4_IG_0380r12-14	PMED4_04001	-1.12803	-1.19472	-1.2451	-1.1736	-1.08647	1.21119	1.17395	1.18046	1.29059	1.23986	1.17582	1.25297
MED4_IG_0389f0-3	asMED4_04101	-1.00542	-1.0444	1.01672	1.07748	1.04753	1.0061	1.32042	1.19214	1.26095	1.21686	1.22442	1.17601
MED4_IG_0389r0-3,MED4_ARR_0375_0-10	PMED4_04101, PMM0377	-1.08188	1.02636	1.02769	1.03754	1.19025	1.10242	1.96351	1.69451	2.04512	1.9651	2.39269	1.74994
MED4_IG_0430f2-6	asMED4_04601	-1.36975	-1.91142	-1.03253	1.38975	-1.19603	1.96578	1.64863	1.64041	1.71608	2.94584	1.74508	1.75177
MED4_IG_0430r0-8	PMED4_04601	-1.06728	-1.02205	-1.00464	-1.03778	1.08147	1.08819	1.36951	1.33244	1.31966	1.38513	1.32378	1.28493
MED4_IG_0701r15-17	asMED4_07401	-1.06765	-1.19128	-1.06293	1.05672	-1.02993	1.14966	1.33049	1.28274	1.24965	1.27784	1.37014	1.19199
MED4_ARR_0681_0-10,IG0701f0-2	PMED4_07401, PMM0684	-1.26638	-1.13228	-1.22126	-1.42944	-1.04483	1.13763	3.87222	1.96159	2.02627	3.93966	1.99995	2.06003
MED4_IG_0703f0-7	asMED4_07481	-1.12029	-1.19333	-1.09994	1.05429	-1.0426	1.15407	1.47116	1.34022	1.45673	1.5887	1.38055	1.29548
MED4_IG_0703r7-10	PMED4_07481	-1.63978	-1.48223	-1.33551	-1.40386	-1.17049	1.07152	1.49986	1.44075	1.46082	1.66001	1.39025	1.44663
MED4_IG_0704f3-6	asMED4_07511	-1.16714	-1.12749	-1.07968	1.11713	1.01772	1.11118	1.24861	1.16223	1.20928	1.24866	1.20447	1.22674
MED4_IG_0704r35-38	PMED4_07511	-1.8317	-1.30113	-1.4825	-1.54628	-1.15653	1.177	1.34474	1.36132	1.2937	1.39667	1.34122	1.30538
MED4_IG_1149f0-3	asMED4_12751	-1.11272	-1.27701	-1.03742	-1.03031	-1.1618	1.02549	1.58187	1.38585	1.41719	1.53684	1.33089	1.60619
MED4_ARR_1121_0-10	PMED4_12751, PMM1127	-1.06264	-1.07759	-1.10108	-1.02768	-1.0671	1.05165	1.44238	1.38481	1.56926	1.70217	1.42412	1.38658
MED4_IG_1409r3-6	asMED4_15701	-2.14447	-1.41932	-1.40751	1.00563	1.0161	1.03782	1.35766	1.29784	1.35346	1.39546	1.35306	1.26708
MED4_IG_1409f2-5	PMED4_15701	-1.09488	1.01887	-1.11323	-1.05914	-1.03222	-1.05045	1.22433	1.19224	1.22268	1.2549	1.1803	1.24626
MED4_IG_1410r1-4	asMED4_15721	2.00396	1.27616	1.62166	1.40201	1.17422	-1.04488	1.43114	1.45005	1.45812	1.42945	1.43866	1.4578
MED4_IG_1410f18-22	PMED4_15721	3.65899	2.33371	1.73525	1.7646	1.10114	-1.46747	1.54968	1.4351	1.58747	1.66894	1.38495	1.43597
MED4_IG_1412r31-33	asMED4_15771	-1.28251	-1.30533	-1.34003	-1.27531	-1.15169	1.15424	1.17947	1.15547	1.18488	1.19636	1.15617	1.19309
MED4_IG_1412f13-17	PMED4_15771	-4.29414	-3.8624	-4.2263	-3.44688	-1.03617	3.35548	1.54581	1.55292	1.59613	1.55982	1.4942	1.51919
MED4_IG_1429r3-6	asMED4_16031	-1.04497	-1.14326	1.00956	-1.05315	1.00949	1.08858	1.38742	1.20588	1.23699	1.27199	1.33945	1.35132
MED4_IG_1429f21-24	PMED4_16031	-1.01314	1.01675	-1.03764	1.03804	1.03865	1.02492	1.28944	1.19831	1.43084	1.48464	1.29496	1.33579
MED4_IG_1443f4-9	asMED4_16221	1.14837	-1.0731	1.01353	1.18322	-1.00588	1.14291	1.85855	1.41766	1.5108	1.5821	1.45237	1.37285
MED4_IG_1443r5-8	PMED4_16221	-1.50604	-1.35541	-1.14296	-1.28824	1.03509	1.19934	1.57679	1.416	1.37843	1.67936	1.5252	1.78804
MED4_IG_1455f0-5	asMED4_16371	-1.2079	-1.09243	-1.10738	1.03415	-1.02991	1.05626	1.44309	1.36253	1.50091	1.43278	1.4906	1.33651
MED4_ARR_1418_0-10,MED4_IG_1455r0-4	PMED4_16371, PMM1429	1.05259	1.03954	-1.02822	1.01167	1.08927	1.03331	2.08258	1.58244	1.706	2.06908	1.78585	1.55742
MED4_IG_1534f0-3	asMED4_17181	1.02642	-1.28076	1.06425	1.12685	1.01579	1.46499	1.5036	1.5451	1.52855	1.49447	1.48848	1.28467
MED4_ARR_1498_0-14	PMED4_17181, PMM1508	1.30881	1.56708	1.288	1.06591	1.17706	-1.07857	3.77288	1.67312	1.78703	3.54064	1.75027	1.99414
MED4_IG_1549f0-3	asMED4_17331	-1.82185	-1.88273	-1.41686	-1.37789	-1.07147	1.93163	1.67271	1.70017	1.68113	1.73483	1.68959	1.47984
MED4_ARR_1513_0-27,MED4_IG_1549r0-2	PMED4_17331, PMM1523, psaB	-2.75736	-1.00584	-1.50951	1.03255	1.16468	1.1038	4.00159	2.15005	2.65104	3.54325	2.04898	2.27833
MED4_IG_1616f7	asMED4_17971	-1.27751	-1.22326	-1.4297	-1.16502	-1.3711	1.11235	1.07476	1.03108	1.10437	1.08439	1.05652	1.11766
MED4_IG_1616r_0-3	PMED4_17971, PMM1587	1.38176	1.35194	1.23428	1.25197	1.13129	-1.26417	1.38589	1.22512	1.12075	1.38262	1.66093	1.43759
MED4_IG_1637f0-3	asMED4_18171	-1.89933	-1.73	-1.50341	-1.12416	-1.26983	1.44938	1.62065	1.56759	1.4707	1.51621	1.58898	2.20356
MED4_ARR_1596_0-9,MED4_IG_1637r0-3	PMED4_18171, PMM1607, psaC	-2.56053	-1.18645	-1.64657	-1.02326	1.0543	1.09314	2.07614	1.65672	1.7629	1.93597	1.6127	1.90698
phage experiment		fold change phage-infected cells /control cells										± standard error phage-infected cells /control cells
probes	gene name	0 h	1 h	2 h	3 h	4 h	5 h	6 h	7 h	8 h	0 h	1 h	2 h	3 h	4 h	5 h	6 h	7 h	8 h
MED4_IG_0064r0-4	asMED4_00641	1.07464	1.03941	1.13398	1.06984	-1.27407	-1.12007	-1.19446	-1.19732	-1.11056	1.3261	1.30693	1.24511	1.32726	1.23491	1.24083	1.21524	1.23332	1.31696
MED4_IG_0064f3-5	PMED4_00641, PMM0062, psbX	-1.08169	-1.56938	-1.31805	-1.47164	-1.40056	-1.24859	-1.34285	-1.32316	-1.20815	1.19237	1.2771	1.15728	1.24232	1.31693	1.21526	1.25766	1.26129	1.19393
MED4_IG_0076r0-1	asMED4_00771	-1.03193	-1.16049	-1.16685	-1.06837	1.22731	1.13534	1.25975	1.23008	1.26602	1.20201	1.07921	1.16046	1.17893	1.1791	1.10321	1.14932	1.13446	1.16555
MED4_ARR_0074_0-13	PMED4_00771, PMM0075	1.2185	-1.07373	-1.08455	-1.20883	-1.23009	-1.22803	-1.19134	-1.08924	-1.276	1.65774	1.46701	1.43948	1.55499	1.6454	1.52065	1.72444	1.51194	1.77035
MED4_IG_0230f0-2	asMED4_02331	-1.011	-1.45383	-1.30666	-1.16279	-1.00471	-1.00757	1.05253	1.02369	-1.01126	1.27079	1.18046	1.12306	1.15592	1.1735	1.18041	1.12339	1.19174	1.17768
MED4_IG_0230r2-4,MED4_ARR_0226_0-10	PMED4_02331, PMM0228, psbO	1.07914	-1.46886	-1.31951	-1.39679	-1.61085	-1.5011	-1.59392	-1.36811	-1.34622	1.68911	1.68517	1.48797	1.44003	1.57207	1.40018	1.35523	1.52742	1.54574
MED4_IG_0272f0-3	asMED4_02731	-1.0736	1.73826	1.3624	1.4499	-1.15175	-1.05613	-1.18983	1.04296	1.09623	1.27394	1.191	1.35142	1.38985	1.21135	1.21543	1.29633	1.31342	1.4658
MED4_IG_0272r1-3,MED4_ARR_0266_0-9	PMED4_02731, PMM0268	-1.10277	1.13747	1.04668	-1.01316	-1.34711	-1.23761	-1.31308	-1.18481	-1.20691	1.82336	1.50837	1.57985	1.58739	1.56445	1.36792	1.32035	1.65021	1.62622
MED4_IG_0321f0-1	asMED4_03211	1.28124	-1.32016	-1.34642	-1.21441	1.36389	1.45967	1.54412	1.28292	1.38033	1.22176	1.20825	1.19357	1.1794	1.22041	1.1203	1.15971	1.17413	1.14892
MED4_ARR_0313_0-18,MED4_IG_0321r4	PMED4_03211, PMM0315, psbB	1.05518	-1.2282	-1.24262	-1.27068	-1.4463	-1.45475	-1.55176	-1.38143	-1.32577	2.15893	1.85573	1.5325	1.40537	1.31379	1.45269	1.3894	1.58714	1.69171
IG0335r0-2	as_RNA_38	-1.27222	1.9135	2.04531	2.03778	-1.18377	-1.12664	-1.44769	-1.13143	1.03385	1.25222	1.2929	1.19474	1.3083	1.36802	1.29944	1.16008	1.42117	1.40085
RNA0011_0-10,MED4_IG_0335f1-3 ,MED4_ IG_0337f0-1	RNA_38	1.02187	-1.02416	1.00814	1.04401	-1.04728	-1.02914	-1.00199	-1.01675	1.03987	1.56246	1.43661	1.39142	1.49276	1.92456	1.40837	1.44417	1.39896	1.58183
MED4_IG_0346f9-12	asMED4_03431	1.251	1.26583	1.19996	1.16723	1.01058	1.02557	1.21322	1.12358	1.2848	1.43602	1.31816	1.36359	1.3466	1.26316	1.2347	1.19168	1.31559	1.31586
MED4_IG_0346r3-10	PMED4_03431	-1.09298	-1.03441	-1.06805	-1.30505	-1.28501	-1.33494	-1.27476	-1.39613	-1.42615	1.6247	1.42146	1.25336	1.32532	1.53951	1.32549	1.35079	1.60852	1.52435
MED4_IG_0380f38	asMED4_04001	-1.13684	1.33659	1.18574	1.30211	1.47498	1.52679	1.16087	1.22712	1.54174	1.11794	1.10209	1.10739	1.05234	1.20065	1.19308	1.14664	1.22681	1.24775
MED4_IG_0380r12-14	PMED4_04001	1.00202	1.01931	-1.03615	-1.02857	-1.09659	-1.11406	-1.13892	-1.07412	-1.18694	1.11128	1.18206	1.15045	1.098	1.17556	1.13287	1.21325	1.24046	1.19119
MED4_IG_0389f0-3	asMED4_04101	-1.16004	-1.02137	1.09051	1.23184	1.1421	1.07483	1.15272	1.12084	1.05335	1.23294	1.22558	1.19212	1.21035	1.1953	1.1661	1.20876	1.18871	1.27313
MED4_IG_0389r0-3,MED4_ARR_0375_0-10	PMED4_04101, PMM0377	-1.08485	1.03039	-1.01504	1.00089	-1.11963	-1.17585	-1.11412	-1.14666	-1.10599	1.55797	1.47048	1.47954	1.41419	1.49391	1.46247	1.57291	1.73564	1.70782
MED4_IG_0430f2-6	asMED4_04601	-1.16718	2.17027	2.17483	2.39068	-1.08697	1.01442	-1.05712	1.03193	1.07081	1.3404	1.40328	1.302	1.46846	1.56886	1.37373	1.39905	1.50163	1.41512
MED4_IG_0430r0-8	PMED4_04601	-1.09366	1.02916	1.04739	1.0415	-1.05598	-1.07031	-1.10648	-1.04678	-1.15909	1.44471	1.22672	1.1933	1.25465	1.32434	1.21196	1.35161	1.30963	1.37966
MED4_IG_0701r15-17	asMED4_07401	1.00739	1.15807	1.62958	2.23575	1.9241	1.72079	1.60134	1.62658	1.43334	1.21001	1.13493	1.19824	1.15886	1.1973	1.13661	1.09781	1.29227	1.37505
MED4_ARR_0681_0-10,IG0701f0-2	PMED4_07401, PMM0684	-1.08658	1.05503	1.71934	2.58501	2.31806	2.19532	2.10753	2.08512	1.90782	1.63177	1.39633	1.43257	1.42511	1.35596	1.36952	1.31381	1.66358	1.59619
MED4_IG_0703f0-7	asMED4_07481	1.01468	-1.10225	-1.05526	-1.01303	1.03167	1.01804	1.02829	1.00847	1.05568	1.35769	1.23096	1.30084	1.39278	1.34279	1.2321	1.28843	1.19622	1.38388
MED4_IG_0703r7-10	PMED4_07481	-1.0101	-1.22465	-1.17611	-1.33974	-1.25592	-1.281	-1.16811	-1.34271	-1.43404	1.16188	1.21002	1.18375	1.21163	1.31412	1.18977	1.11207	1.21947	1.30492
MED4_IG_0704f3-6	asMED4_07511	1.04735	-1.15296	-1.0769	-1.03794	-1.1142	-1.01536	-1.03638	-1.05969	-1.05289	1.15268	1.2181	1.32541	1.23526	1.2975	1.21582	1.17558	1.18726	1.34586
MED4_IG_0704r35-38	PMED4_07511	1.03495	-1.11941	-1.06469	-1.38328	-1.19781	-1.29418	-1.09926	-1.24917	-1.55333	1.40289	1.44804	1.15352	1.49256	1.54078	1.2441	1.20814	1.25416	1.38875
MED4_IG_1149f0-3	asMED4_12751	1.16886	-1.1803	-1.02811	-1.02544	1.27217	1.32936	1.32574	1.28278	1.13757	1.21313	1.14967	1.20907	1.31239	1.19301	1.18454	1.22196	1.28495	1.24557
MED4_ARR_1121_0-10	PMED4_12751, PMM1127	-1.01345	1.02353	1.00019	1.13144	1.25022	1.145	1.19488	1.17727	1.14551	1.40306	1.3034	1.23302	1.33401	1.39418	1.31434	1.35202	1.31478	1.38239
MED4_IG_1409r3-6	asMED4_15701	1.0304	-1.27704	-1.08657	-1.13974	-1.02394	1.02735	-1.05281	-1.04977	-1.08916	1.15502	1.19845	1.15519	1.19078	1.24037	1.17478	1.22602	1.21057	1.24371
MED4_IG_1409f2-5	PMED4_15701	1.14782	-1.16167	-1.00042	-1.14848	-1.10928	-1.09793	1.01545	-1.10347	-1.27902	1.25865	1.41599	1.27579	1.33538	1.43741	1.23193	1.23859	1.1825	1.38682
MED4_IG_1410r1-4	asMED4_15721	1.06336	1.02474	1.02244	1.1939	1.5734	1.44856	1.58402	1.58038	1.5229	1.33222	1.18296	1.25021	1.23731	1.43766	1.34559	1.46126	1.40561	1.4018
MED4_IG_1410f18-22	PMED4_15721	1.04386	1.06381	1.17765	1.34394	1.3506	1.32926	1.41454	1.57403	1.32417	1.2112	1.17137	1.182	1.15837	1.20016	1.17194	1.25172	1.27139	1.20044
MED4_IG_1412r31-33	asMED4_15771	-1.14303	1.28014	1.31784	1.29533	1.05576	1.03073	1.02885	-1.07182	-1.05904	1.17161	1.14898	1.17481	1.14178	1.18628	1.20149	1.11185	1.15297	1.24824
MED4_IG_1412f13-17	PMED4_15771	-1.514	1.42044	1.22422	1.17939	-1.10267	-1.21388	-1.20424	-1.42952	-1.31566	1.4685	1.15279	1.25542	1.20476	1.19509	1.23208	1.28598	1.35495	1.38125
MED4_IG_1429r3-6	asMED4_16031	1.01251	-1.08238	-1.07119	-1.01506	1.14716	1.2293	1.2582	1.13286	1.26454	1.23437	1.16348	1.13944	1.1941	1.27983	1.2077	1.20024	1.18566	1.20157
MED4_IG_1429f21-24	PMED4_16031	1.001	-1.14534	1.02674	1.28001	1.39135	1.434	1.49	1.49384	1.56288	1.19279	1.15298	1.14115	1.18844	1.09831	1.1451	1.26808	1.18698	1.29832
MED4_IG_1443f4-9	asMED4_16221	-1.09874	1.10443	1.11453	1.01461	-1.1347	-1.16196	-1.18208	-1.08123	-1.09857	1.3238	1.22632	1.26962	1.15992	1.25227	1.30881	1.23843	1.30286	1.25768
MED4_IG_1443r5-8	PMED4_16221	-1.65311	-1.05331	-1.01393	-1.0074	-1.4185	-1.33564	-1.5728	-1.40039	-1.50714	1.32622	1.19246	1.29475	1.23698	1.18421	1.17146	1.28422	1.38306	1.27712
MED4_IG_1455f0-5	asMED4_16371	1.06755	-1.21635	-1.03516	1.16797	1.40644	1.42065	1.3317	1.35743	1.33101	1.25438	1.25456	1.29176	1.33281	1.25125	1.28912	1.20907	1.31204	1.20789
MED4_ARR_1418_0-10,MED4_IG_1455r0-4	PMED4_16371, PMM1429	-1.00607	-1.07629	1.05469	1.21626	1.43097	1.3395	1.28018	1.30715	1.22901	1.40382	1.29209	1.33661	1.46714	1.41985	1.44177	1.45818	1.33205	1.4396
MED4_IG_1534f0-3	asMED4_17181	-1.10901	1.64639	1.50334	1.62939	-1.09824	-1.05546	-1.24704	-1.03283	1.24594	1.46958	1.40677	1.23504	1.38389	1.3342	1.37569	1.38322	1.57967	1.53054
MED4_ARR_1498_0-14	PMED4_17181, PMM1508	-1.04268	-1.03189	-1.14143	-1.17513	-1.1237	-1.22188	-1.30336	-1.1168	-1.03575	1.79027	1.47543	1.35306	1.37957	1.36643	1.40029	1.62852	1.65365	1.48927
MED4_IG_1549f0-3	asMED4_17331	1.11419	1.76174	1.56577	1.49723	-1.26643	-1.16184	-1.75857	-1.44712	-1.0805	1.55671	1.40007	1.28588	1.49212	1.69168	1.41596	1.33238	1.8857	1.70714
MED4_ARR_1513_0-27,MED4_IG_1549r0-2	PMED4_17331, PMM1523, psaB	1.17629	1.24876	1.09335	1.09128	-1.27222	-1.31131	-1.24721	-1.29767	-1.26625	2.65048	2.29458	2.3283	1.65965	1.89192	1.7099	1.56209	1.95696	2.12488
MED4_IG_1616f7	asMED4_17971	1.15589	-1.37171	-1.18357	-1.47577	1.37526	1.30849	1.22647	1.11752	-1.01966	1.08738	1.04877	1.07788	1.11499	1.07621	1.06632	1.04053	1.11194	1.03981
MED4_IG_1616r_0-3	PMED4_17971, PMM1587	1.25475	-1.24497	-1.09284	-1.15772	-1.03089	1.01576	1.02217	-1.00635	-1.14592	1.22518	1.18587	1.14377	1.21303	1.20892	1.16064	1.2195	1.22406	1.2303
MED4_IG_1637f0-3	asMED4_18171	1.06941	1.12757	1.11896	1.22035	-1.20694	-1.12789	-1.09061	-1.02991	-1.08384	1.29703	1.2849	1.36521	1.28693	1.14301	1.19864	1.12914	1.1896	1.35932
MED4_ARR_1596_0-9,MED4_IG_1637r0-3	PMED4_18171, PMM1607, psaC	1.03345	-1.25294	-1.11665	-1.24798	-1.32086	-1.17076	-1.22887	-1.22049	-1.30208	1.81494	1.89067	1.48825	1.50752	1.48571	1.30216	1.273	1.49738	1.48399
phosphorus experiment		fold change phosphate deplete/phosphate replete cells					± standard error phosphate deplete/phosphate replete cells
probes	gene name	0 h	4 h	12 h	24 h	48 h	0 h	4 h	12 h	24 h	48 h
MED4_IG_0064r0-4	asMED4_00641	1.1127	1.14771	-1.22745	1.16234	-1.01483	1.47686	1.58516	1.425	1.30632	1.4433
MED4_IG_0064f3-5	PMED4_00641, PMM0062, psbX	1.36377	1.22872	-1.08382	1.06973	-1.05935	1.38837	1.19323	1.11541	1.37513	1.5864
MED4_IG_0076r0-1	asMED4_00771	-1.38377	1.11178	-1.02406	-1.04243	-1.17239	1.54147	1.80604	1.39977	1.13583	1.67673
MED4_ARR_0074_0-13	PMED4_00771, PMM0075	1.23398	1.13168	1.24791	-1.07588	1.1215	1.84319	1.72875	1.85416	1.54539	2.30478
MED4_IG_0230f0-2	asMED4_02331	-1.3311	1.17907	-1.05457	-1.0587	-1.08957	1.82039	2.15494	1.24324	1.34374	1.42782
MED4_IG_0230r2-4,MED4_ARR_0226_0-10	PMED4_02331, PMM0228, psbO	1.45153	1.32818	1.29678	1.0989	-1.01239	1.92113	2.04944	1.51389	1.49181	2.05425
MED4_IG_0272f0-3	asMED4_02731	1.19211	-1.10318	-1.13593	1.21493	1.09847	1.72695	2.08219	1.69079	1.41972	1.78279
MED4_IG_0272r1-3,MED4_ARR_0266_0-9	PMED4_02731, PMM0268	1.12315	1.14285	1.32721	1.11912	1.25678	2.04498	2.80047	1.99312	1.69106	2.83365
MED4_IG_0321f0-1	asMED4_03211	-2.06298	1.21188	-1.26498	-1.60672	-1.21322	2.60702	3.6478	1.61357	1.85517	1.41506
MED4_ARR_0313_0-18,MED4_IG_0321r4	PMED4_03211, PMM0315, psbB	1.45446	1.0655	1.02881	1.06895	-1.07643	2.23393	2.0409	1.78272	1.5477	3.43985
IG0335r0-2	as_RNA_38	1.06594	-1.14482	-1.62824	1.1415	-1.61188	1.60165	1.92758	1.42844	1.5662	1.85832
RNA0011_0-10,MED4_IG_0335f1-3 ,MED4_ IG_0337f0-1	RNA_38	-1.06169	-1.17437	-1.10056	-1.12615	-1.20603	1.40445	2.10156	3.19827	1.50998	1.69471
MED4_IG_0346f9-12	asMED4_03431	-1.01762	1.23791	-1.27727	1.18646	1.22669	1.42198	1.46779	1.47294	1.38878	1.50696
MED4_IG_0346r3-10	PMED4_03431	-1.16187	1.29816	-1.30094	1.14308	1.31611	1.83193	1.99724	1.87664	1.54338	2.77898
MED4_IG_0380f38	asMED4_04001	-1.034	-1.27202	-1.23386	-1.21917	-1.70392	1.14648	1.41129	1.22126	1.18212	1.22013
MED4_IG_0380r12-14	PMED4_04001	-1.12191	1.06689	-1.08093	-1.00306	1.11191	1.33155	1.17088	1.17502	1.20252	1.51445
MED4_IG_0389f0-3	asMED4_04101	-1.08212	1.23547	-1.03529	1.16761	1.11401	1.51985	2.22574	1.37082	1.2895	1.56082
MED4_IG_0389r0-3,MED4_ARR_0375_0-10	PMED4_04101, PMM0377	1.01746	1.07604	1.04918	1.13491	1.11596	1.94837	1.96509	1.55214	1.88296	2.11884
MED4_IG_0430f2-6	asMED4_04601	1.81725	-1.02309	-1.95692	1.40001	-2.12694	2.45236	5.60829	3.18501	1.86116	2.84374
MED4_IG_0430r0-8	PMED4_04601	-1.01009	1.03924	1.03956	1.09315	1.0599	1.3382	1.4944	1.40808	1.28686	1.71239
MED4_IG_0701r15-17	asMED4_07401	1.10535	-1.00514	-1.00846	1.1558	1.10522	1.37001	1.39278	1.23515	1.3043	1.54482
MED4_ARR_0681_0-10,IG0701f0-2	PMED4_07401, PMM0684	-1.00871	-1.00836	1.00523	1.07668	1.04211	2.16718	2.13193	1.48444	1.45494	1.98741
MED4_IG_0703f0-7	asMED4_07481	1.00235	1.09701	-1.0647	1.0528	-1.03912	1.72376	2.35491	1.53935	1.46102	1.66135
MED4_IG_0703r7-10	PMED4_07481	-1.22251	1.01179	-1.11862	-1.00525	1.10257	1.25101	1.30757	1.30563	1.24978	1.58839
MED4_IG_0704f3-6	asMED4_07511	-1.24776	1.35973	-1.23619	1.20159	1.06915	1.61739	1.68811	1.67766	1.24092	1.6518
MED4_IG_0704r35-38	PMED4_07511	-1.49641	1.34895	-1.05739	-1.09063	1.24932	1.43036	1.42908	1.44825	1.53907	1.56479
MED4_IG_1149f0-3	asMED4_12751	-1.0425	1.13413	-1.0605	-1.01589	-1.22939	1.87537	2.49704	1.2585	1.3165	1.63069
MED4_ARR_1121_0-10	PMED4_12751, PMM1127	-1.09453	1.05596	-1.0581	-1.00204	-1.19419	1.69469	2.43128	1.54449	1.40489	1.72011
MED4_IG_1409r3-6	asMED4_15701	-1.09575	1.11555	-1.05814	1.08428	1.03456	1.624	1.4659	1.27255	1.24387	1.52307
MED4_IG_1409f2-5	PMED4_15701	1.03599	1.17562	1.0502	-1.12598	1.16193	1.23505	1.33746	1.34844	1.37536	1.50975
MED4_IG_1410r1-4	asMED4_15721	-1.15591	1.04285	-1.05819	1.00836	-1.34185	1.49729	1.39934	1.222	1.18	1.63778
MED4_IG_1410f18-22	PMED4_15721	-1.03328	1.09184	1.25223	-1.04803	-1.12057	1.34816	1.41469	1.26295	1.17554	1.47923
MED4_IG_1412r31-33	asMED4_15771	-1.06594	-1.21905	-1.87216	1.1823	-1.46708	1.70629	2.16328	1.48125	1.2495	1.34452
MED4_IG_1412f13-17	PMED4_15771	-1.71366	-1.47205	-2.27528	1.0794	-1.91899	1.77751	2.13555	1.74599	1.43929	2.27236
MED4_IG_1429r3-6	asMED4_16031	-1.1835	1.084	-1.03597	1.11189	1.21327	1.53664	1.55792	1.21477	1.28094	1.70382
MED4_IG_1429f21-24	PMED4_16031	-1.26652	1.027	-1.07878	1.12472	2.67085	1.70039	1.73162	1.30695	1.19663	1.56715
MED4_IG_1443f4-9	asMED4_16221	-1.04801	1.00175	-1.13026	1.04907	1.71151	1.59248	1.25951	1.23823	1.34341	2.09352
MED4_IG_1443r5-8	PMED4_16221	-1.51179	-1.3129	-1.19866	1.07016	-1.34468	1.8942	1.56723	1.33356	1.27241	1.39546
MED4_IG_1455f0-5	asMED4_16371	-1.16718	1.05452	1.05482	-1.0005	-1.07016	2.11144	2.89534	1.53555	1.25851	1.33608
MED4_ARR_1418_0-10,MED4_IG_1455r0-4	PMED4_16371, PMM1429	-1.11925	1.11172	-1.04357	-1.01561	-1.02669	1.9794	3.38711	1.4948	1.53632	2.01663
MED4_IG_1534f0-3	asMED4_17181	1.16612	-1.10448	-1.06355	1.14703	-1.24544	1.58538	1.44739	1.34277	1.44928	1.39922
MED4_ARR_1498_0-14	PMED4_17181, PMM1508	-1.12862	1.1652	1.13357	1.08597	-1.01897	1.69657	1.62467	1.44487	1.47975	1.66182
MED4_IG_1549f0-3	asMED4_17331	-1.02824	-1.01267	-1.71385	1.10932	-1.76887	1.90814	3.08839	2.03733	1.57787	1.58421
MED4_ARR_1513_0-27,MED4_IG_1549r0-2	PMED4_17331, PMM1523, psaB	-1.04997	-1.04241	-1.04776	1.02831	-1.29164	2.94515	1.82301	1.75022	1.58389	2.39714
MED4_IG_1616f7	asMED4_17971	-1.70619	1.21622	1.0619	-1.00287	1.03519	1.65112	1.7614	1.06443	1.06062	1.07334
MED4_IG_1616r_0-3	PMED4_17971, PMM1587	1.09646	1.28613	1.41801	1.0253	1.25738	1.38913	1.50489	1.37688	1.17967	1.46083
MED4_IG_1637f0-3	asMED4_18171	1.07988	1.25254	-1.10659	1.33311	1.27983	1.38269	1.38649	1.64507	1.30058	1.99676
MED4_ARR_1596_0-9,MED4_IG_1637r0-3	PMED4_18171, PMM1607, psaC	-1.12958	1.11552	1.01068	-1.05005	1.04174	1.75095	2.05956	1.40346	1.39759	1.75942

## Sheet: summary log2
light experiment		fold change						± standard error
probes	gene name	HL-dark	WL-dark	Blue-dark	Red-dark	Green-dark	DCMU-WL	HL-dark	WL-dark	Blue-dark	Red-dark	Green-dark	DCMU-WL
MED4_IG_0064r0-4	asMED4_00641	-0.431264	-0.380207	-0.1157	-0.0360473	-0.0552331	0.322167	0.343702	0.29968	0.408689	0.44381	0.33074	0.404529
MED4_IG_0064f3-5	PMED4_00641, PMM0062, psbX	-0.725345	-0.283442	-0.164225	0.336588	0.306028	0.193642	0.569116	0.565663	0.513966	0.546142	0.446298	0.457995
MED4_IG_0076r0-1	asMED4_00771	0.0104009	-0.0998153	0.14104	-0.028523	-0.121024	0.0979133	0.227911	0.216111	0.301547	0.216406	0.201762	0.228224
MED4_ARR_0074_0-13	PMED4_00771, PMM0075	0.813774	0.59027	1.02751	0.214334	0.308995	-0.236317	1.01762	0.518528	0.817605	0.832289	0.697339	0.519443
MED4_IG_0230f0-2	asMED4_02331	-0.0791954	-0.0835271	0.0206453	-0.0156615	-0.0317155	-0.0483872	0.226268	0.271899	0.376873	0.364808	0.275703	0.227311
MED4_IG_0230r2-4,MED4_ARR_0226_0-10	PMED4_02331, PMM0228, psbO	-0.978062	0.347279	-0.273291	0.17737	0.356963	-0.100356	1.89312	1.04399	1.06863	1.94912	1.04165	0.893584
MED4_IG_0272f0-3	asMED4_02731	0.190194	-0.180808	0.0824835	0.274389	-0.239164	0.304954	0.585973	0.414301	0.345919	0.519124	0.373799	0.568641
MED4_IG_0272r1-3,MED4_ARR_0266_0-9	PMED4_02731, PMM0268	0.548271	0.602667	0.343121	0.316142	-0.0360279	0.0400292	1.39852	0.762433	0.891972	1.1364	0.771931	0.904611
MED4_IG_0321f0-1	asMED4_03211	-0.142641	-0.06647	0.0273306	-0.122585	0.112793	0.0310648	0.388259	0.203463	0.187767	0.356218	0.274469	0.157235
MED4_ARR_0313_0-18,MED4_IG_0321r4	PMED4_03211, PMM0315, psbB	-0.825989	0.163269	-0.231643	0.102555	0.274406	0.00848093	1.40716	0.912108	0.986357	1.62078	0.891843	1.2151
IG0335r0-2	as_RNA_38	-0.211242	-0.878931	-0.416583	-0.256041	-0.316924	0.879547	0.533872	0.70599	0.654955	0.84065	0.602777	0.593776
RNA0011_0-10,MED4_IG_0335f1-3 ,MED4_ IG_0337f0-1	RNA_38	-0.100742	-0.0450968	-0.0525191	0.127491	-0.289526	-0.216767	1.24071	0.865156	0.82709	0.893366	0.728048	1.4538
MED4_IG_0346f9-12	asMED4_03431	-0.23109	-0.14545	0.0322233	-0.0717421	-0.083633	0.124173	0.461258	0.440196	0.435787	0.583907	0.518765	0.297527
MED4_IG_0346r3-10	PMED4_03431	-1.78811	-1.08187	-1.47568	-1.0209	-0.0812213	0.925163	1.3242	0.798527	0.915075	1.10754	0.708335	0.804144
MED4_IG_0380f38	asMED4_04001	-0.139887	-0.111552	0.17053	0.238643	0.257939	-0.0401481	0.27581	0.232063	0.3489	0.279943	0.251093	0.262824
MED4_IG_0380r12-14	PMED4_04001	-0.173808	-0.256675	-0.316258	-0.230936	-0.119644	0.276428	0.231366	0.239349	0.368033	0.310178	0.233665	0.325354
MED4_IG_0389f0-3	asMED4_04101	-0.00779612	-0.0626797	0.0239248	0.107657	0.0669848	0.00878037	0.400994	0.253548	0.334513	0.283164	0.292098	0.233897
MED4_IG_0389r0-3,MED4_ARR_0375_0-10	PMED4_04101, PMM0377	-0.113534	0.0375404	0.0394081	0.0531628	0.25126	0.140678	0.973437	0.760865	1.03219	0.974602	1.25863	0.807305
MED4_IG_0430f2-6	asMED4_04601	-0.453918	-0.934642	-0.0461772	0.474828	-0.258248	0.975104	0.721269	0.714059	0.779116	1.55868	0.803297	0.808812
MED4_IG_0430r0-8	PMED4_04601	-0.0939323	-0.0314633	-0.00667809	-0.0535001	0.112988	0.121931	0.453657	0.414069	0.400164	0.470019	0.404666	0.361688
MED4_IG_0701r15-17	asMED4_07401	-0.0944406	-0.252512	-0.0880508	0.0795867	-0.0425415	0.201206	0.411953	0.359228	0.321519	0.353706	0.454328	0.25337
MED4_ARR_0681_0-10,IG0701f0-2	PMED4_07401, PMM0684	-0.340706	-0.179235	-0.288365	-0.515448	-0.063266	0.186035	1.95316	0.972027	1.01883	1.97807	0.999967	1.04266
MED4_IG_0703f0-7	asMED4_07481	-0.163868	-0.254995	-0.137426	0.0762652	-0.0601796	0.206735	0.556958	0.422466	0.542736	0.667843	0.465248	0.373485
MED4_IG_0703r7-10	PMED4_07481	-0.713499	-0.567765	-0.417388	-0.489402	-0.22711	0.099657	0.584825	0.526825	0.546774	0.731192	0.475345	0.532695
MED4_IG_0704f3-6	asMED4_07511	-0.222984	-0.173112	-0.1106	0.159801	0.0253446	0.152098	0.320323	0.216893	0.27415	0.320379	0.2684	0.294828
MED4_IG_0704r35-38	PMED4_07511	-0.873186	-0.37977	-0.568029	-0.628802	-0.209798	0.235116	0.427331	0.445002	0.371503	0.481988	0.423543	0.384469
MED4_IG_1149f0-3	asMED4_12751	-0.154095	-0.352775	-0.0529943	-0.0430765	-0.216368	0.0363108	0.661635	0.470775	0.503037	0.619968	0.412392	0.683646
MED4_ARR_1121_0-10	PMED4_12751, PMM1127	-0.0876467	-0.10781	-0.138914	-0.0393928	-0.0936947	0.0726492	0.528447	0.469684	0.65008	0.767373	0.510066	0.471536
MED4_IG_1409r3-6	asMED4_15701	-1.10062	-0.505204	-0.493149	0.00809957	0.0230393	0.0535616	0.441119	0.376117	0.436653	0.480738	0.436228	0.341507
MED4_IG_1409f2-5	PMED4_15701	-0.130773	0.0269692	-0.154748	-0.0828882	-0.0457473	-0.0710029	0.291993	0.253674	0.290043	0.32757	0.239148	0.317603
MED4_IG_1410r1-4	asMED4_15721	1.00285	0.351809	0.697475	0.487494	0.2317	-0.0633431	0.517169	0.536103	0.544105	0.515457	0.524726	0.54379
MED4_IG_1410f18-22	PMED4_15721	1.87145	1.22262	0.79514	0.81934	0.138999	-0.553327	0.63197	0.521153	0.666728	0.738936	0.469831	0.522029
MED4_IG_1412r31-33	asMED4_15771	-0.358972	-0.384417	-0.422267	-0.350843	-0.203748	0.206943	0.238141	0.208482	0.244746	0.258657	0.209357	0.254703
MED4_IG_1412f13-17	PMED4_15771	-2.10237	-1.9495	-2.07939	-1.78529	-0.051261	1.74652	0.62836	0.63498	0.674582	0.641382	0.579376	0.603304
MED4_IG_1429r3-6	asMED4_16031	-0.063467	-0.193148	0.0137288	-0.0747162	0.0136313	0.122447	0.472405	0.270092	0.30683	0.347088	0.421644	0.434368
MED4_IG_1429f21-24	PMED4_16031	-0.018833	0.0239627	-0.0533093	0.0538676	0.0547072	0.0355141	0.366741	0.261	0.516862	0.57011	0.372905	0.417689
MED4_IG_1443f4-9	asMED4_16221	0.199591	-0.101779	0.0193929	0.242715	-0.00846022	0.192711	0.894177	0.503508	0.595316	0.661842	0.538412	0.457173
MED4_IG_1443r5-8	PMED4_16221	-0.590758	-0.43873	-0.19277	-0.365398	0.049756	0.262241	0.656987	0.501816	0.463025	0.747908	0.609002	0.838381
MED4_IG_1455f0-5	asMED4_16371	-0.272496	-0.127537	-0.147146	0.0484495	-0.0425238	0.0789607	0.529162	0.44629	0.585836	0.518821	0.575891	0.418473
MED4_ARR_1418_0-10,MED4_IG_1455r0-4	PMED4_16371, PMM1429	0.0739433	0.055946	-0.0401431	0.0167363	0.123363	0.0472701	1.05837	0.662148	0.77062	1.04899	0.836611	0.639155
MED4_IG_1534f0-3	asMED4_17181	0.0376251	-0.357002	0.0898422	0.1723	0.0225966	0.550894	0.588416	0.627696	0.612163	0.579632	0.573844	0.361393
MED4_ARR_1498_0-14	PMED4_17181, PMM1508	0.388253	0.648083	0.365128	0.0920896	0.235189	-0.10912	1.91566	0.742537	0.837564	1.82401	0.807574	0.995766
MED4_IG_1549f0-3	asMED4_17331	-0.865402	-0.91283	-0.502698	-0.462465	-0.0995879	0.949819	0.742191	0.765681	0.749429	0.79479	0.756675	0.565445
MED4_ARR_1513_0-27,MED4_IG_1549r0-2	PMED4_17331, PMM1523, psaB	-1.46329	-0.0084046	-0.594079	0.0462119	0.219928	0.142478	2.00058	1.10437	1.40656	1.82507	1.0349	1.18797
MED4_IG_1616f7	asMED4_17971	-0.353331	-0.290736	-0.515712	-0.22036	-0.455334	0.153615	0.104011	0.0441595	0.14322	0.116886	0.079321	0.160476
MED4_IG_1616r_0-3	PMED4_17971, PMM1587	0.466512	0.435032	0.303671	0.324195	0.177963	-0.338194	0.470814	0.292919	0.164467	0.467405	0.731992	0.523654
MED4_IG_1637f0-3	asMED4_18171	-0.92549	-0.790769	-0.588236	-0.168851	-0.344632	0.535438	0.696569	0.648551	0.556499	0.600474	0.668103	1.13984
MED4_ARR_1596_0-9,MED4_IG_1637r0-3	PMED4_18171, PMM1607, psaC	-1.35644	-0.246654	-0.719466	-0.0331671	0.076286	0.128479	1.0539	0.728332	0.817948	0.953053	0.689477	0.93129
phage experiment		fold change phage-infected cells /control cells										± standard error phage-infected cells /control cells
probes	gene name	0 h	1 h	2 h	3 h	4 h	5 h	6 h	7 h	8 h	0 h	1 h	2 h	3 h	4 h	5 h	6 h	7 h	8 h
MED4_IG_0064r0-4	asMED4_00641	0.103854	0.0557613	0.181399	0.097389	-0.349447	-0.163593	-0.256364	-0.259807	-0.151288	0.407191	0.386178	0.316268	0.408455	0.304406	0.311306	0.281245	0.302551	0.397213
MED4_IG_0064f3-5	PMED4_00641, PMM0062, psbX	-0.113289	-0.650191	-0.3984	-0.55742	-0.486004	-0.320301	-0.425293	-0.403987	-0.2728	0.253833	0.352871	0.210732	0.313038	0.397183	0.281263	0.330747	0.334899	0.255723
MED4_IG_0076r0-1	asMED4_00771	-0.045348	-0.214734	-0.222621	-0.0954136	0.295503	0.183121	0.333139	0.298753	0.340302	0.265445	0.10997	0.214692	0.237481	0.237683	0.14171	0.200785	0.182	0.221005
MED4_ARR_0074_0-13	PMED4_00771, PMM0075	0.285103	-0.102632	-0.117097	-0.273612	-0.298765	-0.296343	-0.252581	-0.123318	-0.351623	0.729215	0.552877	0.52555	0.636908	0.718435	0.604684	0.786126	0.596402	0.824034
MED4_IG_0230f0-2	asMED4_02331	-0.0157774	-0.539861	-0.385888	-0.217589	-0.00678383	-0.0108795	0.0738591	0.0337724	-0.0161588	0.345721	0.239345	0.167437	0.209039	0.230816	0.239287	0.167862	0.253075	0.23595
MED4_IG_0230r2-4,MED4_ARR_0226_0-10	PMED4_02331, PMM0228, psbO	0.109878	-0.554695	-0.399999	-0.482114	-0.687821	-0.58602	-0.672579	-0.452181	-0.428911	0.756265	0.752898	0.573344	0.526102	0.652668	0.485616	0.438536	0.611099	0.628297
MED4_IG_0272f0-3	asMED4_02731	-0.102454	0.797646	0.446148	0.535952	-0.203827	-0.0787901	-0.25076	0.0606804	0.132547	0.349297	0.252171	0.434473	0.474931	0.276613	0.281471	0.374428	0.393326	0.551692
MED4_IG_0272r1-3,MED4_ARR_0266_0-9	PMED4_02731, PMM0268	-0.141138	0.18583	0.0658269	-0.0188565	-0.429864	-0.307551	-0.39295	-0.244658	-0.271323	0.866596	0.592989	0.659784	0.666655	0.645652	0.451983	0.400916	0.722652	0.701527
MED4_IG_0321f0-1	asMED4_03211	0.357536	-0.400708	-0.429126	-0.280251	0.44773	0.545642	0.626781	0.359436	0.465012	0.288961	0.272921	0.255279	0.238054	0.287367	0.163886	0.213768	0.231589	0.20028
MED4_ARR_0313_0-18,MED4_IG_0321r4	PMED4_03211, PMM0315, psbB	0.0774838	-0.296551	-0.313386	-0.345605	-0.532363	-0.540772	-0.633907	-0.466163	-0.406832	1.11032	0.891985	0.615883	0.49095	0.393739	0.538723	0.474462	0.666431	0.758485
IG0335r0-2	as_RNA_38	-0.347344	0.936211	1.03232	1.027	-0.243391	-0.172025	-0.533755	-0.178147	0.048026	0.324487	0.370612	0.256692	0.38769	0.452086	0.377887	0.214229	0.507081	0.486299
RNA0011_0-10,MED4_IG_0335f1-3 ,MED4_ IG_0337f0-1	RNA_38	0.0312097	-0.034442	0.0116991	0.0621302	-0.0666421	-0.0414366	-0.00286922	-0.0239688	0.0564032	0.643817	0.522672	0.476554	0.577978	0.944526	0.494028	0.53024	0.484358	0.661598
MED4_IG_0346f9-12	asMED4_03431	0.323079	0.340085	0.262984	0.22309	0.015183	0.0364278	0.278837	0.168109	0.361544	0.522072	0.398525	0.447414	0.429324	0.33704	0.304157	0.253003	0.395707	0.396005
MED4_IG_0346r3-10	PMED4_03431	-0.128271	-0.0488012	-0.0949805	-0.384101	-0.361776	-0.41677	-0.350228	-0.481437	-0.512127	0.700176	0.507373	0.3258	0.406342	0.622467	0.406523	0.433803	0.685732	0.608199
MED4_IG_0380f38	asMED4_04001	-0.185029	0.418556	0.245787	0.380857	0.560693	0.610506	0.215203	0.295271	0.624561	0.160837	0.140236	0.14716	0.0736002	0.263819	0.254692	0.197411	0.294913	0.319325
MED4_IG_0380r12-14	PMED4_04001	0.00290838	0.0275966	-0.0512296	-0.0406434	-0.133024	-0.155821	-0.187672	-0.103157	-0.247252	0.152218	0.2413	0.202194	0.134877	0.233348	0.179978	0.278873	0.310877	0.252403
MED4_IG_0389f0-3	asMED4_04101	-0.214178	-0.0305111	0.125002	0.300818	0.19169	0.104103	0.205048	0.164576	0.0749864	0.302102	0.29347	0.253525	0.275424	0.257368	0.221688	0.273525	0.249397	0.348375
MED4_IG_0389r0-3,MED4_ARR_0375_0-10	PMED4_04101, PMM0377	-0.117494	0.0431968	-0.0215322	0.00127906	-0.163023	-0.233706	-0.155899	-0.197439	-0.145341	0.639669	0.556289	0.565149	0.499974	0.57909	0.548406	0.653439	0.795467	0.772158
MED4_IG_0430f2-6	asMED4_04601	-0.223023	1.11787	1.1209	1.25742	-0.120312	0.020653	-0.080141	0.0453473	0.0986978	0.422663	0.488799	0.380735	0.554303	0.649714	0.458095	0.484452	0.586525	0.500928
MED4_IG_0430r0-8	PMED4_04601	-0.129161	0.0414653	0.0668047	0.0586574	-0.0785772	-0.0980287	-0.145976	-0.0659548	-0.212989	0.530783	0.294806	0.254959	0.327288	0.405276	0.277337	0.434681	0.389155	0.464314
MED4_IG_0701r15-17	asMED4_07401	0.0106256	0.211726	0.704504	1.16076	0.944181	0.783067	0.679277	0.701841	0.519379	0.275015	0.182599	0.260921	0.212707	0.259785	0.184741	0.134622	0.369903	0.459489
MED4_ARR_0681_0-10,IG0701f0-2	PMED4_07401, PMM0684	-0.119801	0.0772888	0.781857	1.37017	1.21292	1.13443	1.07556	1.06013	0.931926	0.706433	0.481644	0.518608	0.511072	0.43931	0.453672	0.393759	0.734287	0.674633
MED4_IG_0703f0-7	asMED4_07481	0.0210314	-0.140457	-0.077593	-0.0186804	0.0449775	0.0257984	0.0402463	0.0121644	0.078169	0.441155	0.299779	0.379439	0.477963	0.42523	0.301115	0.36562	0.258486	0.468716
MED4_IG_0703r7-10	PMED4_07481	-0.0144935	-0.292374	-0.234021	-0.421957	-0.328741	-0.357274	-0.224178	-0.425151	-0.520086	0.216458	0.275034	0.24336	0.276946	0.394095	0.25068	0.153246	0.286257	0.383957
MED4_IG_0704f3-6	asMED4_07511	0.0667459	-0.20534	-0.106881	-0.053723	-0.156005	-0.0219896	-0.0515495	-0.0836382	-0.0743547	0.204997	0.284635	0.40644	0.304815	0.375736	0.281932	0.233374	0.247636	0.428534
MED4_IG_0704r35-38	PMED4_07511	0.049565	-0.162743	-0.0904303	-0.468098	-0.260399	-0.372041	-0.13653	-0.320974	-0.635368	0.488405	0.534102	0.206042	0.57779	0.623657	0.3151	0.272792	0.326724	0.473791
MED4_IG_1149f0-3	asMED4_12751	0.225108	-0.239148	-0.0399967	-0.0362406	0.347297	0.410727	0.406801	0.359273	0.185951	0.278737	0.201226	0.273899	0.392196	0.254609	0.244328	0.289201	0.36171	0.316807
MED4_ARR_1121_0-10	PMED4_12751, PMM1127	-0.0192747	0.0335558	0.000268564	0.178154	0.322187	0.195348	0.256864	0.235447	0.195988	0.488579	0.382281	0.302202	0.415767	0.479418	0.394339	0.435115	0.394823	0.467162
MED4_IG_1409r3-6	asMED4_15701	0.0432054	-0.352801	-0.11978	-0.188708	-0.0341306	0.0389267	-0.0742406	-0.070071	-0.123212	0.207918	0.261165	0.208127	0.251908	0.310772	0.232392	0.293979	0.275692	0.314649
MED4_IG_1409f2-5	PMED4_15701	0.1989	-0.216197	-0.000607848	-0.199731	-0.149618	-0.134792	0.0221241	-0.142049	-0.355038	0.331881	0.501813	0.351395	0.417251	0.523473	0.300917	0.308704	0.241841	0.47178
MED4_IG_1410r1-4	asMED4_15721	0.088631	0.0352537	0.0320092	0.255683	0.653882	0.534621	0.663593	0.660274	0.606818	0.41383	0.242404	0.322169	0.307213	0.523724	0.428243	0.54721	0.491196	0.487284
MED4_IG_1410f18-22	PMED4_15721	0.0619223	0.0892383	0.235917	0.426471	0.433597	0.410619	0.500328	0.654465	0.405087	0.276437	0.228199	0.241234	0.212099	0.263221	0.228893	0.323913	0.346404	0.263562
MED4_IG_1412r31-33	asMED4_15771	-0.19286	0.356304	0.398177	0.373317	0.0782772	0.0436647	0.0410284	-0.100062	-0.0827516	0.228488	0.200351	0.232431	0.191286	0.246441	0.264823	0.152956	0.205354	0.319894
MED4_IG_1412f13-17	PMED4_15771	-0.598364	0.506334	0.291863	0.23804	-0.140996	-0.279623	-0.268123	-0.51553	-0.395782	0.554343	0.205129	0.328172	0.268752	0.257122	0.301099	0.362863	0.438235	0.465977
MED4_IG_1429r3-6	asMED4_16031	0.01793	-0.114211	-0.0992081	-0.0215602	0.198069	0.297839	0.331365	0.179971	0.338618	0.303774	0.218449	0.18832	0.255922	0.355951	0.272257	0.263321	0.245694	0.264922
MED4_IG_1429f21-24	PMED4_16031	0.00144374	-0.195776	0.038077	0.356151	0.476486	0.520048	0.575314	0.579028	0.644208	0.254341	0.205364	0.190488	0.249063	0.135284	0.195477	0.342643	0.247299	0.37665
MED4_IG_1443f4-9	asMED4_16221	-0.135846	0.143302	0.156431	0.0209193	-0.182315	-0.216563	-0.241322	-0.112678	-0.135629	0.404681	0.294336	0.344399	0.21402	0.324549	0.388261	0.30851	0.381684	0.330763
MED4_IG_1443r5-8	PMED4_16221	-0.725184	-0.0749277	-0.01996	-0.010641	-0.504365	-0.417535	-0.653335	-0.485831	-0.591814	0.407323	0.253945	0.372679	0.306817	0.24393	0.228313	0.36089	0.467861	0.352893
MED4_IG_1455f0-5	asMED4_16371	0.0943051	-0.28256	-0.0498503	0.224004	0.492045	0.506553	0.413274	0.44088	0.412519	0.326971	0.327181	0.369341	0.41447	0.323367	0.366382	0.273892	0.391816	0.272493
MED4_ARR_1418_0-10,MED4_IG_1455r0-4	PMED4_16371, PMM1429	-0.00872645	-0.106065	0.0768239	0.282451	0.516989	0.421694	0.356344	0.386428	0.297492	0.489359	0.369707	0.418578	0.553002	0.505739	0.527841	0.544173	0.413647	0.525669
MED4_IG_1534f0-3	asMED4_17181	-0.149279	0.719303	0.588169	0.704333	-0.135198	-0.0778678	-0.318509	-0.0466078	0.317233	0.555404	0.492388	0.304555	0.468726	0.415977	0.460159	0.468032	0.659619	0.614036
MED4_ARR_1498_0-14	PMED4_17181, PMM1508	-0.0603012	-0.0452917	-0.190844	-0.232822	-0.168263	-0.289103	-0.382234	-0.159367	-0.050672	0.840179	0.561139	0.436224	0.464223	0.450414	0.485727	0.703565	0.725653	0.57461
MED4_IG_1549f0-3	asMED4_17331	0.155999	0.817001	0.646871	0.582294	-0.340766	-0.21641	-0.814401	-0.533183	-0.111705	0.638505	0.485501	0.36276	0.57736	0.758456	0.50178	0.414003	0.915097	0.771582
MED4_ARR_1513_0-27,MED4_IG_1549r0-2	PMED4_17331, PMM1523, psaB	0.234249	0.320499	0.128754	0.126022	-0.347345	-0.391011	-0.318708	-0.375924	-0.340564	1.40625	1.19823	1.21927	0.730882	0.919848	0.773909	0.643476	0.968614	1.08738
MED4_IG_1616f7	asMED4_17971	0.209001	-0.455972	-0.243147	-0.561468	0.459701	0.387907	0.294518	0.160299	-0.0280923	0.12086	0.0686953	0.10819	0.157036	0.105965	0.0926361	0.0573122	0.15308	0.0563195
MED4_IG_1616r_0-3	PMED4_17971, PMM1587	0.327405	-0.316116	-0.128077	-0.211283	-0.0438841	0.0225639	0.0316391	-0.00912774	-0.196501	0.292993	0.24594	0.1938	0.278612	0.273723	0.214921	0.286288	0.291679	0.299014
MED4_IG_1637f0-3	asMED4_18171	0.0968174	0.17322	0.162162	0.287289	-0.271349	-0.173626	-0.125142	-0.0425139	-0.116148	0.375214	0.361658	0.44912	0.363934	0.192841	0.261404	0.175223	0.250476	0.442882
MED4_ARR_1596_0-9,MED4_IG_1637r0-3	PMED4_18171, PMM1607, psaC	0.0474751	-0.325316	-0.159179	-0.319593	-0.401479	-0.22745	-0.297337	-0.287463	-0.380819	0.859923	0.918898	0.573614	0.592177	0.571155	0.38091	0.348227	0.582438	0.569479
phosphorus experiment		fold change phosphate deplete/phosphate replete cells					± standard error phosphate deplete/phosphate replete cells
probes	gene name	0 h	4 h	12 h	24 h	48 h	0 h	4 h	12 h	24 h	48 h
MED4_IG_0064r0-4	asMED4_00641	0.154067	0.198764	-0.295668	0.217035	-0.0212441	0.562534	0.664629	0.510967	0.385511	0.529369
MED4_IG_0064f3-5	PMED4_00641, PMM0062, psbX	0.447603	0.297151	-0.116119	0.0972407	-0.0831857	0.473395	0.254866	0.15758	0.459568	0.665758
MED4_IG_0076r0-1	asMED4_00771	-0.468609	0.152875	-0.0343029	-0.059953	-0.229454	0.624303	0.85283	0.485185	0.183753	0.745654
MED4_ARR_0074_0-13	PMED4_00771, PMM0075	0.303319	0.178463	0.319519	-0.105519	0.165423	0.882207	0.789726	0.890768	0.627972	1.20463
MED4_IG_0230f0-2	asMED4_02331	-0.412619	0.237651	-0.0766565	-0.0822883	-0.123761	0.864248	1.10764	0.314106	0.426249	0.513815
MED4_IG_0230r2-4,MED4_ARR_0226_0-10	PMED4_02331, PMM0228, psbO	0.537579	0.409454	0.374939	0.136057	-0.0177675	0.941952	1.03523	0.598261	0.577067	1.03861
MED4_IG_0272f0-3	asMED4_02731	0.253515	-0.141667	-0.18388	0.280875	0.135489	0.788227	1.0581	0.757696	0.505605	0.834141
MED4_IG_0272r1-3,MED4_ARR_0266_0-9	PMED4_02731, PMM0268	0.167549	0.19264	0.408397	0.162364	0.329732	1.03209	1.48567	0.99503	0.757926	1.50266
MED4_IG_0321f0-1	asMED4_03211	-1.04473	0.277247	-0.33911	-0.684116	-0.278838	1.3824	1.86703	0.69026	0.891555	0.500866
MED4_ARR_0313_0-18,MED4_IG_0321r4	PMED4_03211, PMM0315, psbB	0.540484	0.0915305	0.0409714	0.0961988	-0.106254	1.15958	1.0292	0.834083	0.630128	1.78234
IG0335r0-2	as_RNA_38	0.0921205	-0.195119	-0.703312	0.190936	-0.68874	0.679558	0.946793	0.514441	0.647266	0.893998
RNA0011_0-10,MED4_IG_0335f1-3 ,MED4_ IG_0337f0-1	RNA_38	-0.0863658	-0.231891	-0.138238	-0.171398	-0.270267	0.490002	1.07146	1.67729	0.594527	0.761041
MED4_IG_0346f9-12	asMED4_03431	-0.0252033	0.307907	-0.353061	0.246663	0.294765	0.507904	0.553646	0.558699	0.473819	0.591645
MED4_IG_0346r3-10	PMED4_03431	-0.216453	0.376464	-0.379557	0.192932	0.396284	0.873367	0.99801	0.908148	0.62609	1.47456
MED4_IG_0380f38	asMED4_04001	-0.0482299	-0.34712	-0.303179	-0.285901	-0.768856	0.197214	0.497017	0.288372	0.241372	0.287033
MED4_IG_0380r12-14	PMED4_04001	-0.165954	0.0934049	-0.112274	-0.00441046	0.153043	0.413108	0.227591	0.232686	0.266055	0.598789
MED4_IG_0389f0-3	asMED4_04101	-0.113866	0.305058	-0.0500365	0.223563	0.155759	0.603931	1.15429	0.455037	0.366817	0.6423
MED4_IG_0389r0-3,MED4_ARR_0375_0-10	PMED4_04101, PMM0377	0.0249663	0.105738	0.0692688	0.182584	0.158282	0.962266	0.974598	0.634262	0.913002	1.08327
MED4_IG_0430f2-6	asMED4_04601	0.861759	-0.032933	-0.968584	0.485436	-1.08878	1.29417	2.48756	1.6713	0.896203	1.50779
MED4_IG_0430r0-8	PMED4_04601	-0.0144868	0.0555252	0.0559711	0.128493	0.083925	0.420298	0.579571	0.493727	0.36386	0.776013
MED4_IG_0701r15-17	asMED4_07401	0.144508	-0.00739248	-0.0121576	0.208887	0.144334	0.454184	0.477962	0.304688	0.383272	0.62744
MED4_ARR_0681_0-10,IG0701f0-2	PMED4_07401, PMM0684	-0.0125136	-0.0120129	0.00751933	0.106593	0.0595012	1.11582	1.09216	0.56992	0.540958	0.990887
MED4_IG_0703f0-7	asMED4_07481	0.00338039	0.133577	-0.0904441	0.074231	-0.055362	0.78556	1.23567	0.622322	0.546976	0.73236
MED4_IG_0703r7-10	PMED4_07481	-0.289844	0.016909	-0.161714	-0.00755531	0.140864	0.32309	0.386889	0.384746	0.321674	0.667568
MED4_IG_0704f3-6	asMED4_07511	-0.319335	0.443317	-0.305902	0.264942	0.0964702	0.693671	0.755407	0.746453	0.311408	0.724036
MED4_IG_0704r35-38	PMED4_07511	-0.581503	0.431834	-0.0805022	-0.125161	0.32114	0.516382	0.51509	0.534314	0.62206	0.645966
MED4_IG_1149f0-3	asMED4_12751	-0.0600407	0.181586	-0.0847432	-0.0227508	-0.297938	0.907173	1.32022	0.331706	0.396709	0.705484
MED4_ARR_1121_0-10	PMED4_12751, PMM1127	-0.130311	0.07856	-0.0814791	-0.00294408	-0.256037	0.761023	1.28172	0.627129	0.490458	0.7825
MED4_IG_1409r3-6	asMED4_15701	-0.13192	0.15775	-0.0815368	0.116736	0.0490177	0.699548	0.551787	0.347724	0.314832	0.606986
MED4_IG_1409f2-5	PMED4_15701	0.0510108	0.233427	0.0706627	-0.171177	0.216528	0.304574	0.419496	0.431295	0.459806	0.594305
MED4_IG_1410r1-4	asMED4_15721	-0.209032	0.0605351	-0.0815935	0.0120165	-0.424228	0.582358	0.484744	0.289243	0.238785	0.711745
MED4_IG_1410f18-22	PMED4_15721	-0.0472333	0.12676	0.324501	-0.0676801	-0.164229	0.430989	0.500481	0.336798	0.233318	0.564842
MED4_IG_1412r31-33	asMED4_15771	-0.0921319	-0.285761	-0.904706	0.241595	-0.552944	0.770867	1.11322	0.566816	0.321346	0.427093
MED4_IG_1412f13-17	PMED4_15771	-0.777077	-0.557825	-1.18605	0.110225	-0.940345	0.829859	1.09461	0.804043	0.525356	1.18419
MED4_IG_1429r3-6	asMED4_16031	-0.243057	0.11637	-0.0509883	0.153012	0.278898	0.619779	0.639619	0.280678	0.357205	0.768776
MED4_IG_1429f21-24	PMED4_16031	-0.340865	0.0384411	-0.109406	0.169566	1.4173	0.765868	0.792123	0.386205	0.25898	0.648139
MED4_IG_1443f4-9	asMED4_16221	-0.0676577	0.00252113	-0.17666	0.0691142	0.775266	0.671271	0.332865	0.308275	0.425902	1.06593
MED4_IG_1443r5-8	PMED4_16221	-0.596256	-0.392754	-0.261421	0.0978248	-0.427266	0.921585	0.648216	0.41528	0.347566	0.480742
MED4_IG_1455f0-5	asMED4_16371	-0.223026	0.0765844	0.0769997	-0.000726116	-0.0978208	1.07823	1.53374	0.618757	0.331718	0.418007
MED4_ARR_1418_0-10,MED4_IG_1455r0-4	PMED4_16371, PMM1429	-0.162531	0.15279	-0.0615248	-0.0223443	-0.0380005	0.985063	1.76005	0.579952	0.619475	1.01194
MED4_IG_1534f0-3	asMED4_17181	0.221713	-0.143374	-0.0888903	0.197905	-0.316655	0.664832	0.533455	0.425209	0.53534	0.484621
MED4_ARR_1498_0-14	PMED4_17181, PMM1508	-0.174559	0.220581	0.180876	0.118979	-0.0271124	0.762623	0.700144	0.530941	0.565353	0.732761
MED4_IG_1549f0-3	asMED4_17331	-0.0401702	-0.018168	-0.777239	0.149677	-0.822827	0.932165	1.62685	1.02668	0.657982	0.663763
MED4_ARR_1513_0-27,MED4_IG_1549r0-2	PMED4_17331, PMM1523, psaB	-0.0703524	-0.0599258	-0.0673103	0.04028	-0.3692	1.55834	0.866325	0.807537	0.663476	1.26131
MED4_IG_1616f7	asMED4_17971	-0.770776	0.282402	0.0866472	-0.00413001	0.0499005	0.723446	0.816726	0.0900748	0.0849143	0.102106
MED4_IG_1616r_0-3	PMED4_17971, PMM1587	0.132856	0.363036	0.50387	0.0360502	0.330417	0.474179	0.589659	0.461408	0.238388	0.546793
MED4_IG_1637f0-3	asMED4_18171	0.11087	0.324858	-0.146117	0.414794	0.355947	0.467478	0.471439	0.718148	0.379157	0.997662
MED4_ARR_1596_0-9,MED4_IG_1637r0-3	PMED4_18171, PMM1607, psaC	-0.17578	0.157719	0.0153322	-0.0704639	0.0589971	0.80814	1.04234	0.488983	0.482945	0.815096
