# Supplementary material for: The Challenge of Regulation in a Minimal Photoautotroph: Non-Coding RNAs in Prochlorococcus
Source: PLoS Genet. 2008 Aug 29;4(8):e1000173. doi: 10.1371/journal.pgen.1000173 (PMC2518516; doi:10.1371/journal.pgen.1000173)
Supplement: Table S5 — BlastP results for new protein-coding genes against the non-redundant NCBI database. Blast search criteria were set to a cut-off E-value below 0.05 using default algorithm parameters except for compositional adjustment that was disabled. Blasts were performed in February 2008 against the NCBI non-redundant database. (0.20 MB XLS) [file pgen.1000173.s008.xls]

## Sheet: Tabelle1
probe name	new name	genomic island	GenBank entry	organism	E-value	GenBank entry	organism	E-value	GenBank entry	organism	E-value	GenBank entry	organism	E-value	GenBank entry	organism	E-value	GenBank entry	organism	E-value	GenBank entry	organism	E-value	GenBank entry	organism	E-value	GenBank entry	organism	E-value	GenBank entry	organism	E-value	GenBank entry	organism	E-value	GenBank entry	organism	E-value	GenBank entry	organism	E-value	GenBank entry	organism	E-value	GenBank entry	organism	E-value	GenBank entry	organism
IG0051r3	PMED4_00502		NO HIT
IG0057f3-5	PMED4_00571		emb|CAP16304.1|	Conserved hypothetical protein [Prochlorococcus marinus subsp. pastoris str. CCMP1986]	1e-16	ref|YP_001008462.1|	hypothetical protein A9601_00671 [Prochlorococcus marinus str. AS9601] gb|ABM69355.1| Predicted protein [Prochlorococcus marinus str. AS9601]	4e-16	ref|YP_001090290.1|	hypothetical protein P9301_00661 [Prochlorococcus marinus str. MIT 9301] ref|YP_001483272.1| hypothetical protein P9215_00671 [Prochlorococcus marinus str. MIT 9215] gb|ABO16689.1| Conserved hypothetical protein [Prochlorococcus marinus str. MIT 9301] gb|ABV49686.1| Conserved hypothetical protein [Prochlorococcus marinus str. MIT 9215]	2e-15	ref|YP_001010380.1|	hypothetical protein P9515_00641 [Prochlorococcus marinus str. MIT 9515] gb|ABM71273.1| Conserved hypothetical protein [Prochlorococcus marinus str. MIT 9515]	2e-15	ref|YP_396554.1|	hypothetical protein PMT9312_0057 [Prochlorococcus marinus str. MIT 9312] gb|ABB49118.1| conserved hypothetical protein [Prochlorococcus marinus str. MIT 9312]	2e-15	ref|YP_292609.1|	hypothetical protein PMN2A_1418 [Prochlorococcus marinus str. NATL2A] ref|YP_001013948.1| hypothetical protein NATL1_01191 [Prochlorococcus marinus str. NATL1A] gb|AAZ58906.1| conserved hypothetical protein [Prochlorococcus marinus str. NATL2A] gb|ABM74683.1| Conserved hypothetical protein [Prochlorococcus marinus str. NATL1A]	2e-09	ref|NP_874462.1|	hypothetical protein Pro0068 [Prochlorococcus marinus subsp. marinus str. CCMP1375] gb|AAP99114.1| Predicted protein [Prochlorococcus marinus subsp. marinus str. CCMP1375]	4e-09	ref|YP_001549947.1|	hypothetical protein P9211_00621 [Prochlorococcus marinus str. MIT 9211] gb|ABX07993.1| Conserved hypothetical protein [Prochlorococcus marinus str. MIT 9211]	1e-08
IG0090r2-3	PMED4_00921		emb|CAP16306.1|	Conserved hypothetical protein [Prochlorococcus marinus subsp. pastoris str. CCMP1986]	4e-27	ref|YP_001010415.1|	hypothetical protein P9515_00991 [Prochlorococcus marinus str. MIT 9515] gb|ABM71308.1| Conserved hypothetical protein [Prochlorococcus marinus str. MIT 9515]	6e-18	ref|YP_001090325.1|	hypothetical protein P9301_01011 [Prochlorococcus marinus str. MIT 9301] gb|ABO16724.1| Conserved hypothetical protein [Prochlorococcus marinus str. MIT 9301]	2e-14	ref|YP_001008497.1|	hypothetical protein A9601_01021 [Prochlorococcus marinus str. AS9601] gb|ABM69390.1| Conserved hypothetical protein [Prochlorococcus marinus str. AS9601]	2e-14	ref|YP_396589.1|	hypothetical protein PMT9312_0092 [Prochlorococcus marinus str. MIT 9312] gb|ABB49153.1| hypothetical protein PMT9312_0092 [Prochlorococcus marinus str. MIT 9312]	2e-14	ref|YP_001483307.1|	hypothetical protein P9215_01021 [Prochlorococcus marinus str. MIT 9215] gb|ABV49721.1| Hypothetical protein P9215_01021 [Prochlorococcus marinus str. MIT 9215]	4e-14	ref|YP_001549984.1|	hypothetical protein P9211_00991 [Prochlorococcus marinus str. MIT 9211] gb|ABX08030.1| Hypothetical protein P9211_00991 [Prochlorococcus marinus str. MIT 9211]	3e-10	ref|YP_001013985.1|	hypothetical protein NATL1_01561 [Prochlorococcus marinus str. NATL1A] gb|ABM74720.1| Hypothetical protein NATL1_01561 [Prochlorococcus marinus str. NATL1A]	2e-09	ref|YP_292645.1|	hypothetical protein PMN2A_1454 [Prochlorococcus marinus str. NATL2A] gb|AAZ58942.1| hypothetical protein PMN2A_1454 [Prochlorococcus marinus str. NATL2A]	2e-09	ref|NP_874498.1|	Predicted membrane protein [Prochlorococcus marinus subsp. marinus str. CCMP1375] gb|AAP99150.1| Predicted membrane protein [Prochlorococcus marinus subsp. marinus str. CCMP1375]	8e-09	ref|YP_001016269.1|	hypothetical protein P9303_02491 [Prochlorococcus marinus str. MIT 9303] gb|ABM77004.1| Hypothetical protein P9303_02491 [Prochlorococcus marinus str. MIT 9303]	2e-08	ref|NP_895461.1|	hypothetical protein PMT1634 [Prochlorococcus marinus str. MIT 9313] emb|CAE21809.1| conserved hypothetical protein [Prochlorococcus marinus str. MIT 9313]	2e-08	ref|ZP_01471125.1|	hypothetical protein RS9916_35472 [Synechococcus sp. RS9916] gb|EAU74920.1| hypothetical protein RS9916_35472 [Synechococcus sp. RS9916]	3e-05	ref|YP_731715.1|	hypothetical protein sync_2521 [Synechococcus sp. CC9311] gb|ABI47803.1| conserved hypothetical protein [Synechococcus sp. CC9311]	7e-05	ref|YP_001225907.1|	hypothetical protein SynWH7803_2184 [Synechococcus sp. WH 7803] emb|CAK24610.1| Uncharacterized conserved membrane protein [Synechococcus sp. WH 7803]	0.0004	ref|ZP_01122682.1|	hypothetical protein WH7805_11503 [Synechococcus sp. WH 7805] gb|EAR19539.1| hypothetical protein WH7805_11503 [Synechococcus sp. WH 7805]
IG0091f4-5	PMED4_00941		emb|CAP16307.1|	Conserved hypothetical protein [Prochlorococcus marinus subsp. pastoris str. CCMP1986]	2e-20	ref|YP_001010417.1|	hypothetical protein P9515_01011 [Prochlorococcus marinus str. MIT 9515] gb|ABM71310.1| Conserved hypothetical protein [Prochlorococcus marinus str. MIT 9515]	3e-17	ref|YP_001483309.1|	hypothetical protein P9215_01041 [Prochlorococcus marinus str. MIT 9215] gb|ABV49723.1| Conserved hypothetical protein [Prochlorococcus marinus str. MIT 9215]	7e-11	ref|YP_001008500.1|	hypothetical protein A9601_01051 [Prochlorococcus marinus str. AS9601] gb|ABM69393.1| Conserved hypothetical protein [Prochlorococcus marinus str. AS9601]	1e-10	gb|ABS83089.1|	Conserved hypothetical protein [Prochlorococcus marinus str. MIT 9312]	1e-10	ref|YP_001090327.1|	hypothetical protein P9301_01031 [Prochlorococcus marinus str. MIT 9301] gb|ABO16726.1| Conserved hypothetical protein [Prochlorococcus marinus str. MIT 9301]	7e-10	ref|ZP_01081093.1|	hypothetical protein RS9917_07515 [Synechococcus sp. RS9917] gb|EAQ68277.1| hypothetical protein RS9917_07515 [Synechococcus sp. RS9917]	1e-05	ref|YP_001016267.1|	hypothetical protein P9303_02471 [Prochlorococcus marinus str. MIT 9303] gb|ABM77002.1| Conserved hypothetical protein [Prochlorococcus marinus str. MIT 9303]	1e-05	ref|YP_001225909.1|	hypothetical protein SynWH7803_2186 [Synechococcus sp. WH 7803] emb|CAK24612.1| Conserved hypothetical protein [Synechococcus sp. WH 7803]	2e-05	ref|ZP_01122680.1|	hypothetical protein WH7805_11493 [Synechococcus sp. WH 7805] gb|EAR19537.1| hypothetical protein WH7805_11493 [Synechococcus sp. WH 7805]	2e-05	ref|ZP_01471127.1|	hypothetical protein RS9916_35482 [Synechococcus sp. RS9916] gb|EAU74922.1| hypothetical protein RS9916_35482 [Synechococcus sp. RS9916]	3e-05	ref|ZP_01468701.1|	hypothetical protein BL107_17340 [Synechococcus sp. BL107] gb|EAU72594.1| hypothetical protein BL107_17340 [Synechococcus sp. BL107]	4e-05	ref|YP_001017926.1|	hypothetical protein P9303_19191 [Prochlorococcus marinus str. MIT 9303] gb|ABM78661.1| Hypothetical protein P9303_19191 [Prochlorococcus marinus str. MIT 9303]	7e-05	ref|ZP_01084254.1|	hypothetical protein WH5701_16046 [Synechococcus sp. WH 5701] gb|EAQ76334.1| hypothetical protein WH5701_16046 [Synechococcus sp. WH 5701]	7e-05	ref|ZP_01472511.1|	hypothetical protein RS9916_26864 [Synechococcus sp. RS9916] gb|EAU73202.1| hypothetical protein RS9916_26864 [Synechococcus sp. RS9916]	0.0002	ref|ZP_01472499.1|	hypothetical protein RS9916_26804 [Synechococcus sp. RS9916] gb|EAU73190.1| hypothetical protein RS9916_26804 [Synechococcus sp. RS9916]
IG0346r4-10_1	PMED4_03431		emb|CAP16314.1|	Conserved hypothetical protein [Prochlorococcus marinus subsp. pastoris str. CCMP1986]	2e-19	ref|YP_001010683.1|	hypothetical protein P9515_03671 [Prochlorococcus marinus str. MIT 9515] gb|ABM71576.1| Conserved hypothetical protein [Prochlorococcus marinus str. MIT 9515]	6e-10	ref|YP_001483563.1|	hypothetical protein P9215_03611 [Prochlorococcus marinus str. MIT 9215] gb|ABS83096.1| Conserved hypothetical protein [Prochlorococcus marinus str. MIT 9312] gb|ABV49977.1| Conserved hypothetical protein [Prochlorococcus marinus str. MIT 9215]	6e-09	ref|YP_001008757.1|	hypothetical protein A9601_03621 [Prochlorococcus marinus str. AS9601] gb|ABM69650.1| Conserved hypothetical protein [Prochlorococcus marinus str. AS9601]	2e-08	ref|YP_001090586.1|	hypothetical protein P9301_03621 [Prochlorococcus marinus str. MIT 9301] gb|ABO16985.1| Conserved hypothetical protein [Prochlorococcus marinus str. MIT 9301]	7e-08	ref|XP_001458211.1|	hypothetical protein GSPATT00003679001 [Paramecium tetraurelia strain d4-2] emb|CAK90814.1| unnamed protein product [Paramecium tetraurelia]	0.007
IG0346r4-10_2	PMED4_03441		emb|CAP16315.1|	Conserved hypothetical protein [Prochlorococcus marinus subsp. pastoris str. CCMP1986]	6e-10	ref|YP_001010684.1|	hypothetical protein P9515_03681 [Prochlorococcus marinus str. MIT 9515] gb|ABM71577.1| Conserved hypothetical protein [Prochlorococcus marinus str. MIT 9515]	2e-09	ref|YP_001008758.1|	hypothetical protein A9601_03631 [Prochlorococcus marinus str. AS9601] ref|YP_001483564.1| hypothetical protein P9215_03621 [Prochlorococcus marinus str. MIT 9215] gb|ABM69651.1| Conserved hypothetical protein [Prochlorococcus marinus str. AS9601] gb|ABV49978.1| Conserved hypothetical protein [Prochlorococcus marinus str. MIT 9215]	3e-07
IG0348f10	PMED4_03462		NO HIT
IG0349f8	PMED4_03491		emb|CAP16317.1|	Conserved hypothetical protein [Prochlorococcus marinus subsp. pastoris str. CCMP1986]	2e-30	gb|ABS83098.1|	Conserved hypothetical protein [Prochlorococcus marinus str. MIT 9312]	1e-13	ref|YP_001090591.1|	hypothetical protein P9301_03671 [Prochlorococcus marinus str. MIT 9301] gb|ABO16990.1| Conserved hypothetical protein [Prochlorococcus marinus str. MIT 9301]	3e-13	ref|YP_001008763.1|	hypothetical protein A9601_03681 [Prochlorococcus marinus str. AS9601] gb|ABM69656.1| Conserved hypothetical protein [Prochlorococcus marinus str. AS9601]	3e-12	ref|YP_001483569.1|	hypothetical protein P9215_03671 [Prochlorococcus marinus str. MIT 9215] gb|ABV49983.1| Conserved hypothetical protein [Prochlorococcus marinus str. MIT 9215]	3e-10
IG0350r2-4	PMED4_03511		emb|CAP16318.1|	Conserved hypothetical protein [Prochlorococcus marinus subsp. pastoris str. CCMP1986]	3e-31	ref|YP_001010689.1|	hypothetical protein P9515_03731 [Prochlorococcus marinus str. MIT 9515] gb|ABM71582.1| Conserved hypothetical protein [Prochlorococcus marinus str. MIT 9515]	1e-29	ref|YP_001483571.1|	hypothetical protein P9215_03691 [Prochlorococcus marinus str. MIT 9215] gb|ABV49985.1| Conserved hypothetical protein [Prochlorococcus marinus str. MIT 9215]	2e-27	ref|YP_001090593.1|	hypothetical protein P9301_03691 [Prochlorococcus marinus str. MIT 9301] gb|ABO16992.1| Conserved hypothetical protein [Prochlorococcus marinus str. MIT 9301]	2e-27	ref|YP_001008765.1|	hypothetical protein A9601_03701 [Prochlorococcus marinus str. AS9601] gb|ABM69658.1| Conserved hypothetical protein [Prochlorococcus marinus str. AS9601]	3e-27	gb|ABS83099.1|	Conserved hypothetical protein [Prochlorococcus marinus str. MIT 9312]	2e-25
IG0354r3	PMED4_03571		emb|CAP16320.1|	Conserved hypothetical protein [Prochlorococcus marinus subsp. pastoris str. CCMP1986]	6e-71	ref|YP_001010694.1|	hypothetical protein P9515_03781 [Prochlorococcus marinus str. MIT 9515] gb|ABM71587.1| Conserved hypothetical protein [Prochlorococcus marinus str. MIT 9515]	2e-66	ref|YP_001483577.1|	hypothetical protein P9215_03751 [Prochlorococcus marinus str. MIT 9215] gb|ABV49991.1| Conserved hypothetical protein [Prochlorococcus marinus str. MIT 9215]	6e-60	ref|YP_001008771.1|	hypothetical protein A9601_03761 [Prochlorococcus marinus str. AS9601] gb|ABM69664.1| Hypothetical protein A9601_03761 [Prochlorococcus marinus str. AS9601]	1e-59	gb|ABE11012.1|	putative protein [uncultured Prochlorococcus marinus clone ASNC729]	5e-59	ref|YP_001090599.1|	hypothetical protein P9301_03751 [Prochlorococcus marinus str. MIT 9301] gb|ABO16998.1| Conserved hypothetical protein [Prochlorococcus marinus str. MIT 9301]	1e-58	ref|YP_396846.1|	hypothetical protein PMT9312_0349 [Prochlorococcus marinus str. MIT 9312] gb|ABB49410.1| conserved hypothetical protein [Prochlorococcus marinus str. MIT 9312]	2e-57	ref|YP_001550255.1|	hypothetical protein P9211_03701 [Prochlorococcus marinus str. MIT 9211] gb|ABX08301.1| Hypothetical protein P9211_03701 [Prochlorococcus marinus str. MIT 9211]	2e-41	ref|YP_001014896.1|	hypothetical protein NATL1_10731 [Prochlorococcus marinus str. NATL1A] gb|ABM75631.1| Hypothetical protein NATL1_10731 [Prochlorococcus marinus str. NATL1A]	2e-38	ref|YP_291584.1|	hypothetical protein PMN2A_0389 [Prochlorococcus marinus str. NATL2A] gb|AAZ57881.1| conserved hypothetical protein [Prochlorococcus marinus str. NATL2A]	8e-38	ref|NP_875615.1|	hypothetical protein Pro1223 [Prochlorococcus marinus subsp. marinus str. CCMP1375] gb|AAQ00268.1| Predicted protein [Prochlorococcus marinus subsp. marinus str. CCMP1375]	2e-32	ref|ZP_01467891.1|	hypothetical protein BL107_13290 [Synechococcus sp. BL107] gb|EAU71784.1| hypothetical protein BL107_13290 [Synechococcus sp. BL107]	6e-30	ref|YP_377183.1|	hypothetical protein Syncc9902_1175 [Synechococcus sp. CC9902] gb|ABB26139.1| conserved hypothetical protein [Synechococcus sp. CC9902]	3e-26	ref|YP_729845.1|	hypothetical protein sync_0627 [Synechococcus sp. CC9311] gb|ABI47219.1| conserved hypothetical protein [Synechococcus sp. CC9311]	2e-24
IG0371f5-6	PMED4_03841	GI 1	emb|CAP16330.1|	Conserved hypothetical protein [Prochlorococcus marinus subsp. pastoris str. CCMP1986]	2e-19	ref|YP_001010720.1|	hypothetical protein P9515_04041 [Prochlorococcus marinus str. MIT 9515] gb|ABM71613.1| Conserved hypothetical protein [Prochlorococcus marinus str. MIT 9515]	2e-15	ref|YP_001090620.1|	hypothetical protein P9301_03961 [Prochlorococcus marinus str. MIT 9301] gb|ABO17019.1| Conserved hypothetical protein [Prochlorococcus marinus str. MIT 9301]	1e-13	ref|YP_001483604.1|	hypothetical protein P9215_04021 [Prochlorococcus marinus str. MIT 9215] gb|ABV50018.1| Conserved hypothetical protein [Prochlorococcus marinus str. MIT 9215]	1e-13	ref|YP_001008792.1|	hypothetical protein A9601_03971 [Prochlorococcus marinus str. AS9601] gb|ABM69685.1| Conserved hypothetical protein [Prochlorococcus marinus str. AS9601]	2e-13	gb|ABS83108.1|	Conserved hypothetical protein [Prochlorococcus marinus str. MIT 9312]	1e-12
IG0375r18	PMED4_03891	GI 1	emb|CAP16331.1|	Conserved hypothetical protein [Prochlorococcus marinus subsp. pastoris str. CCMP1986]	3e-18	ref|YP_001011573.1|	hypothetical protein P9515_12591 [Prochlorococcus marinus str. MIT 9515] gb|ABM72466.1| Hypothetical protein P9515_12591 [Prochlorococcus marinus str. MIT 9515] emb|CAP16331.1| Hypothetical protein [Prochlorococcus marinus subsp. pastoris str. CCMP1986]	1e-14
IG0380r47-51_2	PMED4_03961	GI 1	emb|CAP16333.1|	Conserved hypothetical protein [Prochlorococcus marinus subsp. pastoris str. CCMP1986]	1e-14	gb|ABS83181.1|	Conserved hypothetical protein [Prochlorococcus marinus str. MIT 9312]	2e-11	ref|YP_001483622.1|	hypothetical protein P9215_04201 [Prochlorococcus marinus str. MIT 9215] gb|ABV50036.1| Conserved hypothetical protein [Prochlorococcus marinus str. MIT 9215]	1e-08
IG0380r47-51_1	PMED4_03962	GI 1	NO HIT
IG0380r37-44_1	PMED4_03963	GI 1	NO HIT
IG0380r37-44_2	PMED4_03964	GI 1	NO HIT
IG0380f14-17	PMED4_03965	GI 1	NO HIT
IG0380r22	PMED4_03981	GI 1	emb|CAP16335.1|	Conserved hypothetical protein [Prochlorococcus marinus subsp. pastoris str. CCMP1986]	9e-27	ref|YP_001090628.1|	hypothetical protein P9301_04041 [Prochlorococcus marinus str. MIT 9301] gb|ABO17027.1| Conserved hypothetical protein [Prochlorococcus marinus str. MIT 9301]	4e-21	gb|ABE10755.1|	hypothetical protein ASNC1092_0013 [uncultured Prochlorococcus marinus clone ASNC1092]	6e-21	ref|YP_001008798.1|	hypothetical protein A9601_04031 [Prochlorococcus marinus str. AS9601] gb|ABM69691.1| Conserved hypothetical protein [Prochlorococcus marinus str. AS9601]	2e-20	ref|YP_001483623.1|	hypothetical protein P9215_04211 [Prochlorococcus marinus str. MIT 9215] gb|ABV50037.1| Conserved hypothetical protein [Prochlorococcus marinus str. MIT 9215]	2e-19	ref|YP_001011894.1|	hypothetical protein P9515_15801 [Prochlorococcus marinus str. MIT 9515] gb|ABM72787.1| Hypothetical protein P9515_15801 [Prochlorococcus marinus str. MIT 9515]	6e-13	gb|ABS83188.1|	Hypothetical protein PMT9312_1916 [Prochlorococcus marinus str. MIT 9312]	1e-08
IG0380r26	PMED4_03991	GI 1	emb|CAP16336.1|	Conserved hypothetical protein [Prochlorococcus marinus subsp. pastoris str. CCMP1986]	3e-23	ref|YP_001090629.1|	hypothetical protein P9301_04051 [Prochlorococcus marinus str. MIT 9301] gb|ABO17028.1| Conserved hypothetical protein [Prochlorococcus marinus str. MIT 9301]	7e-11	gb|ABE10756.1|	hypothetical protein ASNC1092_0014 [uncultured Prochlorococcus marinus clone ASNC1092]	2e-09	ref|YP_001008799.1|	hypothetical protein A9601_04041 [Prochlorococcus marinus str. AS9601] gb|ABM69692.1| Conserved hypothetical protein [Prochlorococcus marinus str. AS9601]	2e-08	ref|YP_001483624.1|	hypothetical protein P9215_04221 [Prochlorococcus marinus str. MIT 9215] gb|ABV50038.1| Conserved hypothetical protein [Prochlorococcus marinus str. MIT 9215]	5e-08
IG0390r3-4	PMED4_04151	GI 1	emb|CAP16342.1|	Hypothetical protein [Prochlorococcus marinus subsp. pastoris str. CCMP1986]	2e-16	ref|YP_001484832.1|	hypothetical protein P9215_16331 [Prochlorococcus marinus str. MIT 9215] gb|ABV51246.1| Hypothetical protein P9215_16331 [Prochlorococcus marinus str. MIT 9215]	4e-15	ref|YP_001010745.1|	hypothetical protein P9515_04291 [Prochlorococcus marinus str. MIT 9515] gb|ABM71638.1| Hypothetical protein P9515_04291 [Prochlorococcus marinus str. MIT 9515]	8e-15	ref|YP_397985.1|	hypothetical protein PMT9312_1489 [Prochlorococcus marinus str. MIT 9312] gb|ABB50549.1| conserved hypothetical protein [Prochlorococcus marinus str. MIT 9312]	3e-14	ref|YP_396864.1|	hypothetical protein PMT9312_0367 [Prochlorococcus marinus str. MIT 9312] gb|ABB49428.1| conserved hypothetical protein [Prochlorococcus marinus str. MIT 9312]	6e-13	ref|YP_001010006.1|	hypothetical protein A9601_16161 [Prochlorococcus marinus str. AS9601] gb|ABM70899.1| Hypothetical protein A9601_16161 [Prochlorococcus marinus str. AS9601]	7e-13	ref|YP_001017191.1|	hypothetical protein P9303_11771 [Prochlorococcus marinus str. MIT 9303] gb|ABM77926.1| Hypothetical protein P9303_11771 [Prochlorococcus marinus str. MIT 9303]	5e-11	ref|NP_875029.1|	hypothetical protein Pro0637 [Prochlorococcus marinus subsp. marinus str. CCMP1375] gb|AAP99681.1| Predicted protein [Prochlorococcus marinus subsp. marinus str. CCMP1375]	5e-08	ref|YP_001621656.1|	hypothetical protein PMN2A_2084 [Prochlorococcus marinus str. NATL2A] gb|ABU24009.1| Hypothetical protein PMN2A_2084 [Prochlorococcus marinus str. NATL2A]	4e-07	ref|YP_001011911.1|	hypothetical protein P9515_15971 [Prochlorococcus marinus str. MIT 9515] gb|ABM72804.1| Hypothetical protein P9515_15971 [Prochlorococcus marinus str. MIT 9515]	0.0001
IG0392f2	PMED4_04181	GI 1	emb|CAP16343.1|	Hypothetical protein [Prochlorococcus marinus subsp. pastoris str. CCMP1986]	2e-30	ref|YP_001091485.1|	hypothetical protein P9301_12611 [Prochlorococcus marinus str. MIT 9301] gb|ABO17884.1| Hypothetical protein P9301_12611 [Prochlorococcus marinus str. MIT 9301]	9e-19	ref|YP_001009648.1|	hypothetical protein A9601_12571 [Prochlorococcus marinus str. AS9601] gb|ABM70541.1| Hypothetical protein A9601_12571 [Prochlorococcus marinus str. AS9601]	2e-15	gb|ABS83184.1|	Conserved hypothetical protein [Prochlorococcus marinus str. MIT 9312]	1e-08
IG0418r14-17	PMED4_04461		emb|CAP16348.1|	Conserved hypothetical protein [Prochlorococcus marinus subsp. pastoris str. CCMP1986]	6e-10	ref|YP_001091580.1|	hypothetical protein P9301_13561 [Prochlorococcus marinus str. MIT 9301] gb|ABO17979.1| Conserved hypothetical protein [Prochlorococcus marinus str. MIT 9301]	2e-07	ref|YP_001010359.1|	hypothetical protein P9515_00431 [Prochlorococcus marinus str. MIT 9515] gb|ABM71252.1| Hypothetical protein P9515_00431 [Prochlorococcus marinus str. MIT 9515]	6e-07	gb|ABE10867.1|	hypothetical protein ASNC2259_0023 [uncultured Prochlorococcus marinus clone ASNC2259]	3e-05	ref|YP_001483617.1|	hypothetical protein P9215_04151 [Prochlorococcus marinus str. MIT 9215] gb|ABV50031.1| Hypothetical protein P9215_04151 [Prochlorococcus marinus str. MIT 9215]	0.0001
IG0430r0-7	PMED4_04601		emb|CAP16350.1|	Conserved hypothetical protein [Prochlorococcus marinus subsp. pastoris str. CCMP1986]	3e-30	gb|ABE11239.1|	putative protein [uncultured Prochlorococcus marinus clone HF10-88F10]	1e-27	ref|YP_396909.1|	hypothetical protein PMT9312_0412 [Prochlorococcus marinus str. MIT 9312] ref|YP_001008862.1| hypothetical protein A9601_04671 [Prochlorococcus marinus str. AS9601] ref|YP_001090660.1| hypothetical protein P9301_04361 [Prochlorococcus marinus str. MIT 9301] gb|ABB49473.1| conserved hypothetical protein [Prochlorococcus marinus str. MIT 9312] gb|ABM69755.1| Predicted protein [Prochlorococcus marin…	3e-26	ref|YP_001483695.1|	hypothetical protein P9215_04931 [Prochlorococcus marinus str. MIT 9215] gb|ABV50109.1| Conserved hypothetical protein [Prochlorococcus marinus str. MIT 9215]	3e-22	ref|NP_874809.1|	hypothetical protein Pro0415 [Prochlorococcus marinus subsp. marinus str. CCMP1375] gb|AAP99461.1| Predicted protein [Prochlorococcus marinus subsp. marinus str. CCMP1375]	2e-11	ref|NP_898041.1|	hypothetical protein SYNW1950 [Synechococcus sp. WH 8102] emb|CAE08465.1| hypothetical [Synechococcus sp. WH 8102]	8e-10	ref|YP_001550300.1|	hypothetical protein P9211_04151 [Prochlorococcus marinus str. MIT 9211] gb|ABX08346.1| Conserved hypothetical protein [Prochlorococcus marinus str. MIT 9211]	3e-09	ref|YP_001015051.1|	hypothetical protein NATL1_12281 [Prochlorococcus marinus str. NATL1A] gb|ABM75786.1| Hypothetical protein NATL1_12281 [Prochlorococcus marinus str. NATL1A]	2e-08	ref|YP_291695.1|	hypothetical protein PMN2A_0501 [Prochlorococcus marinus str. NATL2A] gb|AAZ57992.1| conserved hypothetical protein [Prochlorococcus marinus str. NATL2A]	2e-08	ref|YP_001017721.1|	hypothetical protein P9303_17121 [Prochlorococcus marinus str. MIT 9303] gb|ABM78456.1| Conserved hypothetical protein [Prochlorococcus marinus str. MIT 9303]	4e-07	ref|NP_898539.1|	hypothetical protein SYNW2450 [Synechococcus sp. WH 8102] emb|CAE08965.1| hypothetical [Synechococcus sp. WH 8102]	1e-06	ref|ZP_01471467.1|	hypothetical protein RS9916_37182 [Synechococcus sp. RS9916] gb|EAU75262.1| hypothetical protein RS9916_37182 [Synechococcus sp. RS9916]	0.0002	ref|YP_001090935.1|	hypothetical protein P9301_07111 [Prochlorococcus marinus str. MIT 9301] gb|ABO17334.1| Hypothetical protein P9301_07111 [Prochlorococcus marinus str. MIT 9301]	0.0004	ref|YP_382909.1|	hypothetical protein Syncc9605_2629 [Synechococcus sp. CC9605] gb|ABB36354.1| conserved hypothetical protein [Synechococcus sp. CC9605]	0.0006	ref|YP_377214.1|	hypothetical protein Syncc9902_1206 [Synechococcus sp. CC9902] gb|ABB26170.1| hypothetical protein Syncc9902_1206 [Synechococcus sp. CC9902]	0.0008	ref|YP_378269.1|	hypothetical protein Syncc9902_2268 [Synechococcus sp. CC9902] gb|ABB27226.1| conserved hypothetical protein [Synechococcus sp. CC9902]
IG0436f3-4	PMED4_04671		emb|CAP16351.1|	Conserved hypothetical protein [Prochlorococcus marinus subsp. pastoris str. CCMP1986]	4e-34	ref|YP_396916.1|	hypothetical protein PMT9312_0419 [Prochlorococcus marinus str. MIT 9312] gb|ABB49480.1| hypothetical protein PMT9312_0419 [Prochlorococcus marinus str. MIT 9312]	1e-29	ref|YP_001008869.1|	hypothetical protein A9601_04741 [Prochlorococcus marinus str. AS9601] gb|ABM69762.1| Conserved hypothetical protein [Prochlorococcus marinus str. AS9601]	2e-29	ref|YP_001010800.1|	hypothetical protein P9515_04841 [Prochlorococcus marinus str. MIT 9515] gb|ABM71693.1| Conserved hypothetical protein [Prochlorococcus marinus str. MIT 9515]	4e-29	ref|YP_001483702.1|	hypothetical protein P9215_05001 [Prochlorococcus marinus str. MIT 9215] gb|ABV50116.1| Conserved hypothetical protein [Prochlorococcus marinus str. MIT 9215]	7e-29	ref|YP_001090667.1|	hypothetical protein P9301_04431 [Prochlorococcus marinus str. MIT 9301] gb|ABO17066.1| Conserved hypothetical protein [Prochlorococcus marinus str. MIT 9301]	1e-28
IG0466f0-5	PMED4_05001		emb|CAP16354.1|	Conserved hypothetical protein [Prochlorococcus marinus subsp. pastoris str. CCMP1986]	8e-25	ref|YP_001010831.1|	hypothetical protein P9515_05151 [Prochlorococcus marinus str. MIT 9515] gb|ABM71724.1| Conserved hypothetical protein [Prochlorococcus marinus str. MIT 9515]	1e-21	ref|YP_396949.1|	hypothetical protein PMT9312_0452 [Prochlorococcus marinus str. MIT 9312] ref|YP_001483734.1| hypothetical protein P9215_05321 [Prochlorococcus marinus str. MIT 9215] gb|ABB49513.1| conserved hypothetical protein [Prochlorococcus marinus str. MIT 9312] gb|ABV50148.1| Conserved hypothetical protein [Prochlorococcus marinus str. MIT 9215]	1e-21	ref|YP_001090701.1|	hypothetical protein P9301_04771 [Prochlorococcus marinus str. MIT 9301] gb|ABE11331.1| putative protein [uncultured Prochlorococcus marinus clone HOT0M-10D2] gb|ABO17100.1| Conserved hypothetical protein [Prochlorococcus marinus str. MIT 9301]	4e-21	ref|YP_001008903.1|	hypothetical protein A9601_05081 [Prochlorococcus marinus str. AS9601] gb|ABM69796.1| Predicted protein [Prochlorococcus marinus str. AS9601]	9e-21	ref|NP_874843.1|	hypothetical protein Pro0449 [Prochlorococcus marinus subsp. marinus str. CCMP1375] gb|AAP99495.1| Predicted protein [Prochlorococcus marinus subsp. marinus str. CCMP1375]	4e-14	ref|YP_001014334.1|	hypothetical protein NATL1_05071 [Prochlorococcus marinus str. NATL1A] gb|ABM75069.1| Conserved hypothetical protein [Prochlorococcus marinus str. NATL1A]	6e-14	ref|ZP_01079594.1|	hypothetical protein RS9917_09051 [Synechococcus sp. RS9917] gb|EAQ69570.1| hypothetical protein RS9917_09051 [Synechococcus sp. RS9917]	8e-14	ref|YP_001550336.1|	hypothetical protein P9211_04511 [Prochlorococcus marinus str. MIT 9211] gb|ABX08382.1| Conserved hypothetical protein [Prochlorococcus marinus str. MIT 9211]	8e-14	ref|YP_292975.1|	hypothetical protein PMN2A_1784 [Prochlorococcus marinus str. NATL2A] gb|AAZ59272.1| conserved hypothetical protein [Prochlorococcus marinus str. NATL2A]	1e-13	ref|YP_001016668.1|	hypothetical protein P9303_06511 [Prochlorococcus marinus str. MIT 9303] gb|ABM77403.1| Conserved hypothetical protein [Prochlorococcus marinus str. MIT 9303]	5e-13	ref|YP_380945.1|	hypothetical protein Syncc9605_0616 [Synechococcus sp. CC9605] gb|ABB34390.1| conserved hypothetical protein [Synechococcus sp. CC9605]	5e-13	ref|YP_731338.1|	hypothetical protein sync_2136 [Synechococcus sp. CC9311] gb|ABI46422.1| hypothetical protein sync_2136 [Synechococcus sp. CC9311]	6e-12	ref|NP_897944.1|	hypothetical protein SYNW1853 [Synechococcus sp. WH 8102] emb|CAE08368.1| hypothetical [Synechococcus sp. WH 8102]	6e-12	ref|YP_377747.1|	hypothetical protein Syncc9902_1746 [Synechococcus sp. CC9902] gb|ABB26703.1| conserved hypothetical protein [Synechococcus sp. CC9902]	8e-12	ref|ZP_01123101.1|	hypothetical protein WH7805_13598 [Synechococcus sp. WH 7805] gb|EAR19958.1| hypothetical protein WH7805_13598 [Synechococcus sp. WH 7805]
IG0642r8	PMED4_06761		emb|CAP16356.1|	Conserved hypothetical protein [Prochlorococcus marinus subsp. pastoris str. CCMP1986]	2e-25	ref|YP_001011008.1|	hypothetical protein P9515_06921 [Prochlorococcus marinus str. MIT 9515] gb|ABM71901.1| Conserved hypothetical protein [Prochlorococcus marinus str. MIT 9515]	1e-22	gb|ABS83112.1|	Conserved hypothetical protein [Prochlorococcus marinus str. MIT 9312]	2e-19	ref|YP_001483910.1|	hypothetical protein P9215_07091 [Prochlorococcus marinus str. MIT 9215] gb|ABV50324.1| Conserved hypothetical protein [Prochlorococcus marinus str. MIT 9215]	3e-19	ref|YP_001090877.1|	hypothetical protein P9301_06531 [Prochlorococcus marinus str. MIT 9301] gb|ABO17276.1| Conserved hypothetical protein [Prochlorococcus marinus str. MIT 9301]	5e-19	ref|YP_001550617.1|	hypothetical protein P9211_07321 [Prochlorococcus marinus str. MIT 9211] gb|ABX08663.1| Hypothetical protein P9211_07321 [Prochlorococcus marinus str. MIT 9211]	7e-06	ref|YP_001621519.1|	hypothetical protein PMN2A_1937 [Prochlorococcus marinus str. NATL2A] gb|ABU23872.1| Conserved hypothetical protein [Prochlorococcus marinus str. NATL2A]	4e-05	ref|YP_001014512.1|	hypothetical protein NATL1_06871 [Prochlorococcus marinus str. NATL1A] gb|ABM75247.1| Hypothetical protein NATL1_06871 [Prochlorococcus marinus str. NATL1A]	4e-05
IG0668r5	PMED4_07031		emb|CAP16357.1|	Hypothetical protein [Prochlorococcus marinus subsp. pastoris str. CCMP1986]	2e-20	ref|YP_001009396.1|	hypothetical protein A9601_10051 [Prochlorococcus marinus str. AS9601] gb|ABM70289.1| Hypothetical protein A9601_10051 [Prochlorococcus marinus str. AS9601]	3e-19	ref|YP_001484235.1|	hypothetical protein P9215_10341 [Prochlorococcus marinus str. MIT 9215] gb|ABV50649.1| Hypothetical protein P9215_10341 [Prochlorococcus marinus str. MIT 9215]	4e-17	emb|CAP16416.1|	Hypothetical protein [Prochlorococcus marinus subsp. pastoris str. CCMP1986]	3e-05	ref|YP_001011560.1|	hypothetical protein P9515_12461 [Prochlorococcus marinus str. MIT 9515] gb|ABM72453.1| Hypothetical protein P9515_12461 [Prochlorococcus marinus str. MIT 9515]	0.0006	gb|ABS83232.1|	Conserved hypothetical protein [Prochlorococcus marinus str. MIT 9312]	0.012
IG0672f5	PMED4_07082		ref|YP_397153.1|	hypothetical protein PMT9312_1811 [Prochlorococcus marinus str. MIT 9312] gb|ABB49717.1| hypothetical protein PMT9312_1811 [Prochlorococcus marinus str. MIT 9312]	6e-05
IG0676r28-31	PMED4_07131		emb|CAP16360.1|	Hypothetical protein [Prochlorococcus marinus subsp. pastoris str. CCMP1986]	1e-11	ref|YP_001010012.1|	hypothetical protein A9601_16221 [Prochlorococcus marinus str. AS9601] gb|ABM70905.1| Hypothetical protein A9601_16221 [Prochlorococcus marinus str. AS9601]	7e-06	ref|YP_001484850.1|	hypothetical protein P9215_16511 [Prochlorococcus marinus str. MIT 9215] gb|ABV51264.1| Hypothetical protein P9215_16511 [Prochlorococcus marinus str. MIT 9215]	0.002
IG0676f30-32	PMED4_07151		emb|CAP16363.1|	Conserved hypothetical protein [Prochlorococcus marinus subsp. pastoris str. CCMP1986]	7e-29	ref|YP_001011048.1|	hypothetical protein P9515_07321 [Prochlorococcus marinus str. MIT 9515] gb|ABM71941.1| Conserved hypothetical protein [Prochlorococcus marinus str. MIT 9515]	7e-27	ref|YP_001483945.1|	hypothetical protein P9215_07441 [Prochlorococcus marinus str. MIT 9215] gb|ABV50359.1| Conserved hypothetical protein [Prochlorococcus marinus str. MIT 9215]	1e-19	ref|YP_001009107.1|	hypothetical protein A9601_07141 [Prochlorococcus marinus str. AS9601] ref|YP_001090936.1| hypothetical protein P9301_07121 [Prochlorococcus marinus str. MIT 9301] gb|ABM70000.1| Conserved hypothetical protein [Prochlorococcus marinus str. AS9601] gb|ABO17335.1| Conserved hypothetical protein [Prochlorococcus marinus str. MIT 9301]	7e-19	gb|ABS83116.1|	Conserved hypothetical protein [Prochlorococcus marinus str. MIT 9312]	6e-15
IG0701f10-16	PMED4_07431	GI 2	emb|CAP16365.1|	Hypothetical protein [Prochlorococcus marinus subsp. pastoris str. CCMP1986]	2e-14	ref|YP_001011562.1|	hypothetical protein P9515_12481 [Prochlorococcus marinus str. MIT 9515] gb|ABM72455.1| Hypothetical protein P9515_12481 [Prochlorococcus marinus str. MIT 9515]	4e-07	ref|YP_397998.1|	hypothetical protein PMT9312_1502 [Prochlorococcus marinus str. MIT 9312] gb|ABB50562.1| conserved hypothetical protein [Prochlorococcus marinus str. MIT 9312]	4e-07	ref|YP_001090627.1|	hypothetical protein P9301_04031 [Prochlorococcus marinus str. MIT 9301] gb|ABO17026.1| Hypothetical protein P9301_04031 [Prochlorococcus marinus str. MIT 9301]	1e-06	gb|ABE10732.1|	conserved hypothetical protein [uncultured Prochlorococcus marinus clone ASNC1092]	1e-06	ref|YP_001008797.1|	hypothetical protein A9601_04021 [Prochlorococcus marinus str. AS9601] gb|ABM69690.1| Hypothetical protein A9601_04021 [Prochlorococcus marinus str. AS9601]	4e-06	ref|YP_397673.1|	hypothetical protein PMT9312_1178 [Prochlorococcus marinus str. MIT 9312] gb|ABB50237.1| conserved hypothetical protein [Prochlorococcus marinus str. MIT 9312]	9e-06	ref|YP_001550998.1|	ferredoxin-NADP oxidoreductase (FNR) [Prochlorococcus marinus str. MIT 9211] gb|ABX09044.1| ferredoxin-NADP oxidoreductase (FNR) [Prochlorococcus marinus str. MIT 9211]	0.003	ref|NP_893519.1|	hypothetical protein PMM1402 [Prochlorococcus marinus subsp. pastoris str. CCMP1986] emb|CAE19861.1| unnamed protein product [Prochlorococcus marinus subsp. pastoris str. CCMP1986]	0.005	ref|YP_001011479.1|	ferredoxin-NADP oxidoreductase (FNR) [Prochlorococcus marinus str. MIT 9515] gb|ABM72372.1| ferredoxin-NADP oxidoreductase (FNR) [Prochlorococcus marinus str. MIT 9515]	0.007	ref|YP_001015330.1|	ferredoxin-NADP oxidoreductase (FNR) [Prochlorococcus marinus str. NATL1A] gb|ABM76065.1| ferredoxin-NADP oxidoreductase (FNR) [Prochlorococcus marinus str. NATL1A]	0.009	ref|YP_291869.1|	ferredoxin-NADP oxidoreductase, PetH [Prochlorococcus marinus str. NATL2A] gb|AAZ58166.1| ferredoxin-NADP oxidoreductase, PetH [Prochlorococcus marinus str. NATL2A]	0.009	ref|YP_397581.1|	ferredoxin-NADP oxidoreductase (FNR) [Prochlorococcus marinus str. MIT 9312] gb|ABB50145.1| ferredoxin-NADP oxidoreductase (FNR) [Prochlorococcus marinus str. MIT 9312]	0.026	ref|NP_893192.1|	ferredoxin-NADP oxidoreductase (FNR) [Prochlorococcus marinus subsp. pastoris str. CCMP1986] emb|CAE19534.1| ferredoxin-NADP oxidoreductase (FNR) [Prochlorococcus marinus subsp. pastoris str. CCMP1986]	0.026
IG0701r2-14	PMED4_07432	GI 2	gb|ABS83192.1|	Conserved hypothetical protein [Prochlorococcus marinus str. MIT 9312]	1e-13	ref|YP_001009671.1|	hypothetical protein A9601_12801 [Prochlorococcus marinus str. AS9601] ref|YP_001091511.1| hypothetical protein P9301_12871 [Prochlorococcus marinus str. MIT 9301] gb|ABM70564.1| Hypothetical protein A9601_12801 [Prochlorococcus marinus str. AS9601] gb|ABO17910.1| Hypothetical protein P9301_12871 [Prochlorococcus marinus str. MIT 9301]	1e-13	gb|ABE10940.1|	hypothetical protein ASNC3046_0021 [uncultured Prochlorococcus marinus clone ASNC3046]	1e-13	ref|YP_001484515.1|	hypothetical protein P9215_13141 [Prochlorococcus marinus str. MIT 9215] gb|ABV50929.1| Hypothetical protein P9215_13141 [Prochlorococcus marinus str. MIT 9215]	3e-13
IG0703r7-9	PMED4_07481	GI 2	emb|CAP16368.1|	Conserved hypothetical protein [Prochlorococcus marinus subsp. pastoris str. CCMP1986]	7e-21	ref|YP_001091819.1|	hypothetical protein P9301_15951 [Prochlorococcus marinus str. MIT 9301] gb|ABO18218.1| Conserved hypothetical protein [Prochlorococcus marinus str. MIT 9301]	1e-14	ref|YP_001010003.1|	hypothetical protein A9601_16131 [Prochlorococcus marinus str. AS9601] gb|ABM70896.1| Conserved hypothetical protein [Prochlorococcus marinus str. AS9601]	2e-13	ref|YP_001015228.1|	hypothetical protein NATL1_14051 [Prochlorococcus marinus str. NATL1A] gb|ABM75963.1| Hypothetical protein NATL1_14051 [Prochlorococcus marinus str. NATL1A]	4e-12	gb|ABS83225.1|	Conserved hypothetical protein [Prochlorococcus marinus str. MIT 9312]	8e-12	ref|YP_001484877.1|	hypothetical protein P9215_16781 [Prochlorococcus marinus str. MIT 9215] gb|ABV51291.1| Conserved hypothetical protein [Prochlorococcus marinus str. MIT 9215]	2e-10
IG0704r38	PMED4_07511	GI 2	emb|CAP16370.1|	Hypothetical protein [Prochlorococcus marinus subsp. pastoris str. CCMP1986]	3e-26	ref|YP_001011899.1|	hypothetical protein P9515_15851 [Prochlorococcus marinus str. MIT 9515] gb|ABM72792.1| Hypothetical protein P9515_15851 [Prochlorococcus marinus str. MIT 9515]	3e-16	ref|YP_001009399.1|	hypothetical protein A9601_10081 [Prochlorococcus marinus str. AS9601] ref|YP_001091230.1| hypothetical protein P9301_10061 [Prochlorococcus marinus str. MIT 9301] gb|ABM70292.1| Hypothetical protein A9601_10081 [Prochlorococcus marinus str. AS9601] gb|ABO17629.1| Conserved hypothetical protein [Prochlorococcus marinus str. MIT 9301]	0.0001	ref|YP_001484238.1|	hypothetical protein P9215_10371 [Prochlorococcus marinus str. MIT 9215] gb|ABV50652.1| Hypothetical protein P9215_10371 [Prochlorococcus marinus str. MIT 9215]	0.0002	gb|ABS83146.1|	Conserved hypothetical protein [Prochlorococcus marinus str. MIT 9312]	0.0002	ref|YP_001015074.1|	hypothetical protein NATL1_12511 [Prochlorococcus marinus str. NATL1A] ref|YP_001621608.1| hypothetical protein PMN2A_2029 [Prochlorococcus marinus str. NATL2A] gb|ABM75809.1| Hypothetical protein NATL1_12511 [Prochlorococcus marinus str. NATL1A] gb|ABU23961.1| Conserved hypothetical protein [Prochlorococcus marinus str. NATL2A]	0.001	ref|YP_001011875.1|	hypothetical protein P9515_15611 [Prochlorococcus marinus str. MIT 9515] gb|ABM72768.1| Conserved hypothetical protein [Prochlorococcus marinus str. MIT 9515]	0.02
IG0704f25-26	PMED4_07522	GI 2	ref|YP_001011916.1|	hypothetical protein P9515_16021 [Prochlorococcus marinus str. MIT 9515] gb|ABM72809.1| Hypothetical protein P9515_16021 [Prochlorococcus marinus str. MIT 9515]	5e-08
IG0708r4	PMED4_07611	GI 2	emb|CAP16376.1|	Conserved hypothetical protein [Prochlorococcus marinus subsp. pastoris str. CCMP1986]	8e-31	ref|YP_001011195.1|	hypothetical protein P9515_08811 [Prochlorococcus marinus str. MIT 9515] gb|ABM72088.1| Conserved hypothetical protein [Prochlorococcus marinus str. MIT 9515]	3e-23	ref|YP_001009149.1|	hypothetical protein A9601_07561 [Prochlorococcus marinus str. AS9601] gb|ABM70042.1| Conserved hypothetical protein [Prochlorococcus marinus str. AS9601]	1e-19	ref|YP_001090978.1|	hypothetical protein P9301_07541 [Prochlorococcus marinus str. MIT 9301] gb|ABO17377.1| Conserved hypothetical protein [Prochlorococcus marinus str. MIT 9301]	2e-19	ref|YP_001483991.1|	hypothetical protein P9215_07901 [Prochlorococcus marinus str. MIT 9215] gb|ABV50405.1| Conserved hypothetical protein [Prochlorococcus marinus str. MIT 9215]	4e-19	gb|ABS83126.1|	Conserved hypothetical protein [Prochlorococcus marinus str. MIT 9312]	5e-19	ref|YP_001550695.1|	hypothetical protein P9211_08101 [Prochlorococcus marinus str. MIT 9211] gb|ABX08741.1| Hypothetical protein P9211_08101 [Prochlorococcus marinus str. MIT 9211]	7e-05	ref|YP_001621690.1|	hypothetical protein PMN2A_2120 [Prochlorococcus marinus str. NATL2A] gb|ABU24043.1| Conserved hypothetical protein [Prochlorococcus marinus str. NATL2A]	0.0001	ref|YP_001015280.1|	hypothetical protein NATL1_14571 [Prochlorococcus marinus str. NATL1A] gb|ABM76015.1| Hypothetical protein NATL1_14571 [Prochlorococcus marinus str. NATL1A]	0.0008
IG0710f2-3	PMED4_07632	GI 2	NO HIT
IG0718f3	PMED4_07751		emb|CAP16380.1|	Conserved hypothetical protein [Prochlorococcus marinus subsp. pastoris str. CCMP1986]	2e-17	ref|YP_001011184.1|	hypothetical protein P9515_08701 [Prochlorococcus marinus str. MIT 9515] gb|ABM72077.1| Conserved hypothetical protein [Prochlorococcus marinus str. MIT 9515]	2e-11	ref|YP_001009163.1|	hypothetical protein A9601_07701 [Prochlorococcus marinus str. AS9601] gb|ABM70056.1| Conserved hypothetical protein [Prochlorococcus marinus str. AS9601]	1e-09	ref|YP_001090992.1|	hypothetical protein P9301_07681 [Prochlorococcus marinus str. MIT 9301] gb|ABO17391.1| Conserved hypothetical protein [Prochlorococcus marinus str. MIT 9301]	3e-09	ref|YP_001484005.1|	hypothetical protein P9215_08041 [Prochlorococcus marinus str. MIT 9215] gb|ABV50419.1| Conserved hypothetical protein [Prochlorococcus marinus str. MIT 9215]	4e-08	gb|ABS83130.1|	Conserved hypothetical protein [Prochlorococcus marinus str. MIT 9312]	3e-07
IG0719f3	PMED4_07771		emb|CAP16381.1|	Conserved hypothetical protein [Prochlorococcus marinus subsp. pastoris str. CCMP1986]	6e-15	ref|YP_001011182.1|	hypothetical protein P9515_08681 [Prochlorococcus marinus str. MIT 9515] gb|ABM72075.1| Conserved hypothetical protein [Prochlorococcus marinus str. MIT 9515]	8e-15	ref|YP_001009165.1|	hypothetical protein A9601_07721 [Prochlorococcus marinus str. AS9601] ref|YP_001090994.1| hypothetical protein P9301_07701 [Prochlorococcus marinus str. MIT 9301] ref|YP_001484007.1| hypothetical protein P9215_08061 [Prochlorococcus marinus str. MIT 9215] gb|ABM70058.1| Conserved hypothetical protein [Prochlorococcus marinus str. AS9601] gb|ABO17393.1| Conserved hypothetical protein [Prochloroco…	9e-13	gb|ABS83131.1|	Conserved hypothetical protein [Prochlorococcus marinus str. MIT 9312]	2e-12
IG0730r5-7	PMED4_07891		ref|YP_001091458.1|	hypothetical protein P9301_12341 [Prochlorococcus marinus str. MIT 9301] gb|ABO17857.1| Conserved hypothetical protein [Prochlorococcus marinus str. MIT 9301]	1e-32	gb|ABS83133.1|	Conserved hypothetical protein [Prochlorococcus marinus str. MIT 9312]	1e-31	emb|CAP16382.1|	Hypothetical protein [Prochlorococcus marinus subsp. pastoris str. CCMP1986]	6e-15	ref|YP_001014976.1|	hypothetical protein NATL1_11531 [Prochlorococcus marinus str. NATL1A] gb|ABM75711.1| Hypothetical protein NATL1_11531 [Prochlorococcus marinus str. NATL1A]	3e-14	ref|YP_001621576.1|	hypothetical protein PMN2A_1997 [Prochlorococcus marinus str. NATL2A] gb|ABU23929.1| Conserved hypothetical protein [Prochlorococcus marinus str. NATL2A]	7e-13
IG0735r5-6	PMED4_07951	genomic islet 1	emb|CAP16384.1|	Hypothetical protein [Prochlorococcus marinus subsp. pastoris str. CCMP1986]	2e-24	emb|CAP16515.1|	Hypothetical protein [Prochlorococcus marinus subsp. pastoris str. CCMP1986]	1e-17	ref|YP_001091457.1|	hypothetical protein P9301_12331 [Prochlorococcus marinus str. MIT 9301] gb|ABO17856.1| Hypothetical protein P9301_12331 [Prochlorococcus marinus str. MIT 9301]	9e-08
IG0741f5-9	PMED4_08021		emb|CAP16385.1|	Conserved hypothetical protein [Prochlorococcus marinus subsp. pastoris str. CCMP1986]	5e-22	ref|YP_001011177.1|	hypothetical protein P9515_08631 [Prochlorococcus marinus str. MIT 9515] gb|ABM72070.1| Conserved hypothetical protein [Prochlorococcus marinus str. MIT 9515] emb|CAP16385.1| Conserved hypothetical protein [Prochlorococcus marinus subsp. pastoris str. CCMP1986]	2e-18	ref|YP_001009172.1|	hypothetical protein A9601_07791 [Prochlorococcus marinus str. AS9601] ref|YP_001091003.1| hypothetical protein P9301_07791 [Prochlorococcus marinus str. MIT 9301] ref|YP_001484014.1| hypothetical protein P9215_08131 [Prochlorococcus marinus str. MIT 9215] gb|ABM70065.1| Conserved hypothetical protein [Prochlorococcus marinus str. AS9601] gb|ABO17402.1| Conserved hypothetical protein [Prochloroco…	4e-13	ref|YP_001621543.1|	hypothetical protein PMN2A_1962 [Prochlorococcus marinus str. NATL2A] gb|ABU23896.1| Conserved hypothetical protein [Prochlorococcus marinus str. NATL2A]	3e-06	ref|YP_001014849.1|	hypothetical protein NATL1_10261 [Prochlorococcus marinus str. NATL1A] gb|ABM75584.1| Hypothetical protein NATL1_10261 [Prochlorococcus marinus str. NATL1A]	3e-06	ref|YP_001621544.1|	hypothetical protein PMN2A_1963 [Prochlorococcus marinus str. NATL2A] gb|ABU23897.1| Conserved hypothetical protein [Prochlorococcus marinus str. NATL2A]	0.002	ref|YP_001014850.1|	hypothetical protein NATL1_10271 [Prochlorococcus marinus str. NATL1A] gb|ABM75585.1| Hypothetical protein NATL1_10271 [Prochlorococcus marinus str. NATL1A]	0.015
IG0751f9	PMED4_08141		emb|CAP16387.1|	Conserved hypothetical protein [Prochlorococcus marinus subsp. pastoris str. CCMP1986]	1e-30	ref|YP_001011165.1|	hypothetical protein P9515_08511 [Prochlorococcus marinus str. MIT 9515] gb|ABM72058.1| Conserved hypothetical protein [Prochlorococcus marinus str. MIT 9515]	1e-28	ref|YP_001091015.1|	hypothetical protein P9301_07911 [Prochlorococcus marinus str. MIT 9301] gb|ABO17414.1| Conserved hypothetical protein [Prochlorococcus marinus str. MIT 9301]	2e-22	ref|YP_397236.1|	hypothetical protein PMT9312_0740 [Prochlorococcus marinus str. MIT 9312] gb|ABB49800.1| conserved hypothetical protein [Prochlorococcus marinus str. MIT 9312]	5e-22	ref|YP_001484026.1|	hypothetical protein P9215_08251 [Prochlorococcus marinus str. MIT 9215] gb|ABV50440.1| Conserved hypothetical protein [Prochlorococcus marinus str. MIT 9215]	9e-21	ref|YP_001009184.1|	hypothetical protein A9601_07911 [Prochlorococcus marinus str. AS9601] gb|ABM70077.1| Conserved hypothetical protein [Prochlorococcus marinus str. AS9601]	1e-20	ref|YP_291328.1|	protein family PM-1 [Prochlorococcus marinus str. NATL2A] ref|YP_001014588.1| hypothetical protein NATL1_07651 [Prochlorococcus marinus str. NATL1A] gb|AAZ57625.1| protein family PM-1 [Prochlorococcus marinus str. NATL2A] gb|ABM75323.1| Hypothetical protein NATL1_07651 [Prochlorococcus marinus str. NATL1A]	2e-15	ref|YP_001551040.1|	hypothetical protein P9211_11551 [Prochlorococcus marinus str. MIT 9211] gb|ABX09086.1| Hypothetical protein P9211_11551 [Prochlorococcus marinus str. MIT 9211]	2e-15	ref|NP_875555.1|	Predicted protein family PM-1 [Prochlorococcus marinus subsp. marinus str. CCMP1375] gb|AAQ00208.1| Predicted protein family PM-1 [Prochlorococcus marinus subsp. marinus str. CCMP1375]	2e-15	ref|YP_378049.1|	hypothetical protein Syncc9902_2048 [Synechococcus sp. CC9902] ref|ZP_01469368.1| hypothetical protein BL107_08109 [Synechococcus sp. BL107] gb|ABB27006.1| conserved hypothetical protein [Synechococcus sp. CC9902] gb|EAU71481.1| hypothetical protein BL107_08109 [Synechococcus sp. BL107]	2e-12	ref|YP_380626.1|	hypothetical protein Syncc9605_0295 [Synechococcus sp. CC9605] gb|ABB34071.1| conserved hypothetical protein [Synechococcus sp. CC9605]	2e-12	ref|NP_895631.1|	hypothetical protein PMT1804 [Prochlorococcus marinus str. MIT 9313] ref|YP_001018388.1| hypothetical protein P9303_23901 [Prochlorococcus marinus str. MIT 9303] emb|CAE21979.1| conserved hypothetical protein [Prochlorococcus marinus str. MIT 9313] gb|ABM79123.1| conserved hypothetical protein [Prochlorococcus marinus str. MIT 9303]	2e-12	ref|ZP_01123487.1|	hypothetical protein WH7805_07436 [Synechococcus sp. WH 7805] ref|YP_001224070.1| Conserved hpothetical protein [Synechococcus sp. WH 7803] gb|EAR19171.1| hypothetical protein WH7805_07436 [Synechococcus sp. WH 7805] emb|CAK22773.1| Conserved hpothetical protein [Synechococcus sp. WH 7803]	2e-12	ref|ZP_01472929.1|	hypothetical protein RS9916_39431 [Synechococcus sp. RS9916] gb|EAU72740.1| hypothetical protein RS9916_39431 [Synechococcus sp. RS9916]	3e-12	ref|NP_896394.1|	hypothetical protein SYNW0299 [Synechococcus sp. WH 8102] emb|CAE06814.1| conserved hypothetical protein [Synechococcus sp. WH 8102]	3e-12	ref|ZP_01080906.1|	hypothetical protein RS9917_03618 [Synechococcus sp. RS9917] gb|EAQ68639.1| hypothetical protein RS9917_03618 [Synechococcus sp. RS9917]
IG0751r12-14	PMED4_08151		emb|CAP16388.1|	Conserved hypothetical protein [Prochlorococcus marinus subsp. pastoris str. CCMP1986]	4e-26	ref|YP_001484027.1|	hypothetical protein P9215_08261 [Prochlorococcus marinus str. MIT 9215] gb|ABV50441.1| Conserved hypothetical protein [Prochlorococcus marinus str. MIT 9215]	4e-20	ref|YP_001091016.1|	hypothetical protein P9301_07921 [Prochlorococcus marinus str. MIT 9301] gb|ABO17415.1| Conserved hypothetical protein [Prochlorococcus marinus str. MIT 9301]	4e-20	ref|YP_397237.1|	hypothetical protein PMT9312_0741 [Prochlorococcus marinus str. MIT 9312] gb|ABB49801.1| conserved hypothetical protein [Prochlorococcus marinus str. MIT 9312]	8e-20	ref|YP_001009185.1|	hypothetical protein A9601_07921 [Prochlorococcus marinus str. AS9601] gb|ABM70078.1| Conserved hypothetical protein [Prochlorococcus marinus str. AS9601]	2e-19	ref|YP_001550715.1|	hypothetical protein P9211_08301 [Prochlorococcus marinus str. MIT 9211] gb|ABX08761.1| Hypothetical protein P9211_08301 [Prochlorococcus marinus str. MIT 9211]	3e-11	ref|NP_875580.1|	hypothetical protein Pro1188 [Prochlorococcus marinus subsp. marinus str. CCMP1375] gb|AAQ00233.1| Predicted protein [Prochlorococcus marinus subsp. marinus str. CCMP1375]	2e-09	ref|YP_001014575.1|	hypothetical protein NATL1_07521 [Prochlorococcus marinus str. NATL1A] gb|ABM75310.1| Hypothetical protein NATL1_07521 [Prochlorococcus marinus str. NATL1A]	3e-09	ref|YP_291317.1|	hypothetical protein PMN2A_0122 [Prochlorococcus marinus str. NATL2A] gb|AAZ57614.1| conserved hypothetical protein [Prochlorococcus marinus str. NATL2A]	3e-09	ref|NP_897528.1|	hypothetical protein SYNW1435 [Synechococcus sp. WH 8102] emb|CAE07950.1| hypothetical [Synechococcus sp. WH 8102]	3e-07	ref|ZP_01472238.1|	hypothetical protein RS9916_30624 [Synechococcus sp. RS9916] gb|EAU73952.1| hypothetical protein RS9916_30624 [Synechococcus sp. RS9916]	4e-07	ref|ZP_01124350.1|	hypothetical protein WH7805_04096 [Synechococcus sp. WH 7805] gb|EAR17941.1| hypothetical protein WH7805_04096 [Synechococcus sp. WH 7805]	5e-07	ref|ZP_01085760.1|	hypothetical protein WH5701_07276 [Synechococcus sp. WH 5701] gb|EAQ74411.1| hypothetical protein WH5701_07276 [Synechococcus sp. WH 5701]	1e-06	ref|YP_376979.1|	hypothetical protein Syncc9902_0969 [Synechococcus sp. CC9902] gb|ABB25935.1| conserved hypothetical protein [Synechococcus sp. CC9902]	2e-06	ref|YP_001225178.1|	hypothetical protein SynWH7803_1455 [Synechococcus sp. WH 7803] emb|CAK23881.1| Conserved hypothetical protein [Synechococcus sp. WH 7803]	5e-06	ref|ZP_01081548.1|	hypothetical protein RS9917_13723 [Synechococcus sp. RS9917] gb|EAQ67943.1| hypothetical protein RS9917_13723 [Synechococcus sp. RS9917]
IG0818r4	PMED4_08892		NO HIT
IG0821f4	PMED4_08922		ref|YP_001011090.1|	hypothetical protein P9515_07741 [Prochlorococcus marinus str. MIT 9515] gb|ABM71983.1| Hypothetical protein P9515_07741 [Prochlorococcus marinus str. MIT 9515]	1e-21	ref|YP_397311.1|	Zn-ribbon protein [Prochlorococcus marinus str. MIT 9312] gb|ABB49875.1| Zn-ribbon protein [Prochlorococcus marinus str. MIT 9312]	8e-15	ref|NP_875279.1|	Zn-ribbon protein [Prochlorococcus marinus subsp. marinus str. CCMP1375] gb|AAP99931.1| Zn-ribbon protein [Prochlorococcus marinus subsp. marinus str. CCMP1375]	1e-08	ref|YP_730942.1|	hypothetical protein sync_1738 [Synechococcus sp. CC9311] gb|ABI45215.1| conserved hypothetical protein [Synechococcus sp. CC9311]	3e-05	ref|YP_382207.1|	hypothetical protein Syncc9605_1911 [Synechococcus sp. CC9605] gb|ABB35652.1| conserved hypothetical protein [Synechococcus sp. CC9605]	0.0002	ref|YP_001550835.1|	hypothetical protein P9211_09501 [Prochlorococcus marinus str. MIT 9211] gb|ABX08881.1| Hypothetical protein P9211_09501 [Prochlorococcus marinus str. MIT 9211]	0.0006	ref|YP_376767.1|	hypothetical protein Syncc9902_0755 [Synechococcus sp. CC9902] gb|ABB25723.1| hypothetical protein Syncc9902_0755 [Synechococcus sp. CC9902]	0.001	ref|ZP_01080233.1|	hypothetical protein RS9917_12260 [Synechococcus sp. RS9917] gb|EAQ69214.1| hypothetical protein RS9917_12260 [Synechococcus sp. RS9917]	0.001	ref|ZP_01468289.1|	hypothetical protein BL107_15280 [Synechococcus sp. BL107] gb|EAU72182.1| hypothetical protein BL107_15280 [Synechococcus sp. BL107]	0.003	ref|NP_896850.1|	hypothetical protein SYNW0757 [Synechococcus sp. WH 8102] emb|CAE07272.1| hypothetical [Synechococcus sp. WH 8102]	0.005	ref|YP_001224903.1|	Zn-ribbon protein [Synechococcus sp. WH 7803] emb|CAK23606.1| Zn-ribbon protein [Synechococcus sp. WH 7803]	0.02	ref|ZP_01124147.1|	hypothetical protein WH7805_03067 [Synechococcus sp. WH 7805] gb|EAR18782.1| hypothetical protein WH7805_03067 [Synechococcus sp. WH 7805]	0.034
IG0825r6-7	PMED4_08991	genomic islet 2	emb|CAP16397.1|	Conserved hypothetical protein [Prochlorococcus marinus subsp. pastoris str. CCMP1986]	5e-22	gb|ABS83142.1|	Conserved hypothetical protein [Prochlorococcus marinus str. MIT 9312]	4e-09	ref|YP_001009270.1|	hypothetical protein A9601_08791 [Prochlorococcus marinus str. AS9601] gb|ABM70163.1| Conserved hypothetical protein [Prochlorococcus marinus str. AS9601]	8e-09	ref|YP_001091100.1|	hypothetical protein P9301_08761 [Prochlorococcus marinus str. MIT 9301] gb|ABO17499.1| Conserved hypothetical protein [Prochlorococcus marinus str. MIT 9301]	2e-08	ref|YP_001484110.1|	hypothetical protein P9215_09091 [Prochlorococcus marinus str. MIT 9215] gb|ABV50524.1| Conserved hypothetical protein [Prochlorococcus marinus str. MIT 9215]	3e-07
IG0829r20	PMED4_09041	genomic islet 2	emb|CAP16398.1|	Conserved hypothetical protein [Prochlorococcus marinus subsp. pastoris str. CCMP1986]	3e-31	ref|YP_001484882.1|	hypothetical protein P9215_16831 [Prochlorococcus marinus str. MIT 9215] gb|ABV51296.1| Hypothetical protein P9215_16831 [Prochlorococcus marinus str. MIT 9215]	2e-22	ref|YP_001011080.1|	hypothetical protein P9515_07641 [Prochlorococcus marinus str. MIT 9515] gb|ABM71973.1| Conserved hypothetical protein [Prochlorococcus marinus str. MIT 9515]	6e-12	ref|YP_001013909.1|	hypothetical protein NATL1_00801 [Prochlorococcus marinus str. NATL1A] gb|ABM74644.1| Hypothetical protein NATL1_00801 [Prochlorococcus marinus str. NATL1A]	0.0005
IG0829r4-6	PMED4_09061	genomic islet 2	emb|CAP16400.1|	Hypothetical protein [Prochlorococcus marinus subsp. pastoris str. CCMP1986] emb|CAP16509.1| Conserved hypothetical protein [Prochlorococcus marinus subsp. pastoris str. CCMP1986]	3e-26	ref|YP_398003.1|	protein family PM-15 [Prochlorococcus marinus str. MIT 9312] gb|ABB50567.1| protein family PM-15 [Prochlorococcus marinus str. MIT 9312]	3e-24	ref|YP_001011202.1|	hypothetical protein P9515_08881 [Prochlorococcus marinus str. MIT 9515] gb|ABM72095.1| Hypothetical protein P9515_08881 [Prochlorococcus marinus str. MIT 9515]	4e-24	ref|YP_397726.1|	protein family PM-15 [Prochlorococcus marinus str. MIT 9312] gb|ABB50290.1| protein family PM-15 [Prochlorococcus marinus str. MIT 9312]	1e-21	ref|YP_001009698.1|	hypothetical protein A9601_13071 [Prochlorococcus marinus str. AS9601] ref|YP_001091545.1| hypothetical protein P9301_13211 [Prochlorococcus marinus str. MIT 9301] ref|YP_001484537.1| hypothetical protein P9215_13361 [Prochlorococcus marinus str. MIT 9215] gb|ABE10926.1| putative protein family PM-15 [uncultured Prochlorococcus marinus clone ASNC3046] gb|ABM70591.1| Conserved hypothetical protein…	2e-21	ref|YP_396921.1|	protein family PM-15 [Prochlorococcus marinus str. MIT 9312] gb|ABB49485.1| protein family PM-15 [Prochlorococcus marinus str. MIT 9312]	2e-15	ref|YP_001008874.1|	hypothetical protein A9601_04791 [Prochlorococcus marinus str. AS9601] gb|ABM69767.1| Hypothetical protein A9601_04791 [Prochlorococcus marinus str. AS9601]	1e-13	ref|ZP_01472243.1|	hypothetical protein RS9916_30649 [Synechococcus sp. RS9916] gb|EAU73957.1| hypothetical protein RS9916_30649 [Synechococcus sp. RS9916]	1e-12	ref|YP_001090672.1|	protein family PM-15 [Prochlorococcus marinus str. MIT 9301] gb|ABO17071.1| protein family PM-15 [Prochlorococcus marinus str. MIT 9301]	2e-12	ref|NP_875863.1|	Predicted protein family PM-15 [Prochlorococcus marinus subsp. marinus str. CCMP1375] gb|AAQ00516.1| Predicted protein family PM-15 [Prochlorococcus marinus subsp. marinus str. CCMP1375]	2e-12	ref|YP_291785.1|	hypothetical protein PMN2A_0591 [Prochlorococcus marinus str. NATL2A] ref|YP_001015202.1| hypothetical protein NATL1_13791 [Prochlorococcus marinus str. NATL1A] gb|AAZ58082.1| hypothetical protein PMN2A_0591 [Prochlorococcus marinus str. NATL2A] gb|ABM75937.1| Hypothetical protein NATL1_13791 [Prochlorococcus marinus str. NATL1A]	1e-11	ref|YP_001551327.1|	hypothetical protein P9211_14421 [Prochlorococcus marinus str. MIT 9211] gb|ABX09373.1| Hypothetical protein P9211_14421 [Prochlorococcus marinus str. MIT 9211]	1e-11	ref|NP_897556.1|	hypothetical protein SYNW1463 [Synechococcus sp. WH 8102] emb|CAE07978.1| hypothetical [Synechococcus sp. WH 8102]	2e-11	ref|ZP_01086393.1|	hypothetical protein WH5701_10714 [Synechococcus sp. WH 5701] gb|EAQ73802.1| hypothetical protein WH5701_10714 [Synechococcus sp. WH 5701]	1e-09	ref|YP_381834.1|	hypothetical protein Syncc9605_1530 [Synechococcus sp. CC9605] gb|ABB35279.1| hypothetical protein Syncc9605_1530 [Synechococcus sp. CC9605]	2e-09	ref|ZP_01083975.1|	hypothetical protein WH5701_14651 [Synechococcus sp. WH 5701] gb|EAQ76055.1| hypothetical protein WH5701_14651 [Synechococcus sp. WH 5701]
IG0833r3-5	PMED4_09111	genomic islet 2	emb|CAP16401.1|	Conserved hypothetical protein [Prochlorococcus marinus subsp. pastoris str. CCMP1986]	3e-20	ref|YP_001483977.1|	hypothetical protein P9215_07761 [Prochlorococcus marinus str. MIT 9215] gb|ABV50391.1| Conserved hypothetical protein [Prochlorococcus marinus str. MIT 9215]	4e-15	gb|ABS83121.1|	Conserved hypothetical protein [Prochlorococcus marinus str. MIT 9312]	5e-15	ref|YP_001090963.1|	hypothetical protein P9301_07391 [Prochlorococcus marinus str. MIT 9301] gb|ABO17362.1| Conserved hypothetical protein [Prochlorococcus marinus str. MIT 9301]	2e-14	ref|YP_001009134.1|	hypothetical protein A9601_07411 [Prochlorococcus marinus str. AS9601] gb|ABM70027.1| Conserved hypothetical protein [Prochlorococcus marinus str. AS9601]	2e-14	ref|YP_001011878.1|	hypothetical protein P9515_15641 [Prochlorococcus marinus str. MIT 9515] gb|ABM72771.1| Hypothetical protein P9515_15641 [Prochlorococcus marinus str. MIT 9515]	3e-13
IG0866f1	PMED4_09461		emb|CAP16404.1|	Conserved hypothetical protein [Prochlorococcus marinus subsp. pastoris str. CCMP1986]	2e-08	ref|YP_001011241.1|	hypothetical protein P9515_09271 [Prochlorococcus marinus str. MIT 9515] gb|ABM72134.1| Conserved hypothetical protein [Prochlorococcus marinus str. MIT 9515] emb|CAP16404.1| Conserved hypothetical protein [Prochlorococcus marinus subsp. pastoris str. CCMP1986]	7e-05	ref|YP_001484251.1|	hypothetical protein P9215_10501 [Prochlorococcus marinus str. MIT 9215] gb|ABV50665.1| Conserved hypothetical protein [Prochlorococcus marinus str. MIT 9215]	0.0002
IG0872f6	PMED4_09541		emb|CAP16406.1|	Conserved hypothetical protein [Prochlorococcus marinus subsp. pastoris str. CCMP1986]	2e-23	ref|YP_001011249.1|	hypothetical protein P9515_09351 [Prochlorococcus marinus str. MIT 9515] gb|ABM72142.1| Conserved hypothetical protein [Prochlorococcus marinus str. MIT 9515]	4e-17	gb|ABS83149.1|	Conserved hypothetical protein [Prochlorococcus marinus str. MIT 9312]	1e-15	ref|YP_001009403.1|	hypothetical protein A9601_10121 [Prochlorococcus marinus str. AS9601] gb|ABM70296.1| Conserved hypothetical protein [Prochlorococcus marinus str. AS9601]	2e-15	ref|YP_001091235.1|	hypothetical protein P9301_10111 [Prochlorococcus marinus str. MIT 9301] gb|ABO17634.1| Conserved hypothetical protein [Prochlorococcus marinus str. MIT 9301]	1e-14	ref|YP_001484243.1|	hypothetical protein P9215_10421 [Prochlorococcus marinus str. MIT 9215] gb|ABV50657.1| Conserved hypothetical protein [Prochlorococcus marinus str. MIT 9215]	2e-14	ref|NP_875097.1|	hypothetical protein Pro0705 [Prochlorococcus marinus subsp. marinus str. CCMP1375] gb|AAP99749.1| Predicted protein [Prochlorococcus marinus subsp. marinus str. CCMP1375]	0.015
IG0873r10-14	PMED4_09591	genomic islet 3	emb|CAP16410.1|	Conserved hypothetical protein [Prochlorococcus marinus subsp. pastoris str. CCMP1986]	2e-20	ref|YP_001011254.1|	hypothetical protein P9515_09401 [Prochlorococcus marinus str. MIT 9515] gb|ABM72147.1| Conserved hypothetical protein [Prochlorococcus marinus str. MIT 9515]	1e-06	ref|YP_397438.1|	hypothetical protein PMT9312_0942 [Prochlorococcus marinus str. MIT 9312] gb|ABB50002.1| hypothetical protein PMT9312_0942 [Prochlorococcus marinus str. MIT 9312]	0.001	ref|YP_001484239.1|	hypothetical protein P9215_10381 [Prochlorococcus marinus str. MIT 9215] gb|ABV50653.1| Hypothetical protein P9215_10381 [Prochlorococcus marinus str. MIT 9215]	0.002	ref|YP_001091231.1|	hypothetical protein P9301_10071 [Prochlorococcus marinus str. MIT 9301] gb|ABO17630.1| Hypothetical protein P9301_10071 [Prochlorococcus marinus str. MIT 9301]	0.012
IG0874f7	PMED4_09621	genomic islet 3	emb|CAP16412.1|	Conserved hypothetical protein [Prochlorococcus marinus subsp. pastoris str. CCMP1986]	2e-12	gb|ABS83226.1|	Conserved hypothetical protein [Prochlorococcus marinus str. MIT 9312]	1e-09	ref|YP_001091820.1|	hypothetical protein P9301_15961 [Prochlorococcus marinus str. MIT 9301] gb|ABO18219.1| Conserved hypothetical protein [Prochlorococcus marinus str. MIT 9301]	2e-09	ref|YP_001484831.1|	hypothetical protein P9215_16321 [Prochlorococcus marinus str. MIT 9215] gb|ABV51245.1| Hypothetical protein P9215_16321 [Prochlorococcus marinus str. MIT 9215]	5e-09	ref|YP_001010004.1|	hypothetical protein A9601_16141 [Prochlorococcus marinus str. AS9601] gb|ABM70897.1| Conserved hypothetical protein [Prochlorococcus marinus str. AS9601]	3e-08
IG0875f11-16	PMED4_09661	genomic islet 3	emb|CAP16415.1|	Hypothetical protein [Prochlorococcus marinus subsp. pastoris str. CCMP1986]	1e-22	ref|YP_001010738.1|	hypothetical protein P9515_04221 [Prochlorococcus marinus str. MIT 9515] gb|ABM71631.1| Hypothetical protein P9515_04221 [Prochlorococcus marinus str. MIT 9515]	9e-11	ref|YP_001009673.1|	hypothetical protein A9601_12821 [Prochlorococcus marinus str. AS9601] gb|ABM70566.1| Hypothetical protein A9601_12821 [Prochlorococcus marinus str. AS9601]	3e-09	ref|YP_001484517.1|	hypothetical protein P9215_13161 [Prochlorococcus marinus str. MIT 9215] gb|ABV50931.1| Hypothetical protein P9215_13161 [Prochlorococcus marinus str. MIT 9215]	8e-09	gb|ABS83193.1|	Conserved hypothetical protein [Prochlorococcus marinus str. MIT 9312]	8e-09	ref|YP_001091513.1|	hypothetical protein P9301_12891 [Prochlorococcus marinus str. MIT 9301] gb|ABO17912.1| Conserved hypothetical protein [Prochlorococcus marinus str. MIT 9301]	8e-09	gb|ABE10941.1|	hypothetical protein ASNC3046_0022 [uncultured Prochlorococcus marinus clone ASNC3046]	2e-08	ref|YP_001091471.1|	hypothetical protein P9301_12471 [Prochlorococcus marinus str. MIT 9301] gb|ABO17870.1| Hypothetical protein P9301_12471 [Prochlorococcus marinus str. MIT 9301]	2e-07	ref|YP_001621660.1|	hypothetical protein PMN2A_2088 [Prochlorococcus marinus str. NATL2A] gb|ABU24013.1| Conserved hypothetical protein [Prochlorococcus marinus str. NATL2A]	1e-05	ref|YP_001015201.1|	hypothetical protein NATL1_13781 [Prochlorococcus marinus str. NATL1A] gb|ABM75936.1| Hypothetical protein NATL1_13781 [Prochlorococcus marinus str. NATL1A]	6e-05
IG0875f23	PMED4_09671	genomic islet 3	emb|CAP16416.1|	Hypothetical protein [Prochlorococcus marinus subsp. pastoris str. CCMP1986]	6e-20	gb|ABS83232.1|	Conserved hypothetical protein [Prochlorococcus marinus str. MIT 9312]	8e-17	ref|YP_001011560.1|	hypothetical protein P9515_12461 [Prochlorococcus marinus str. MIT 9515] gb|ABM72453.1| Hypothetical protein P9515_12461 [Prochlorococcus marinus str. MIT 9515]	4e-16	ref|YP_001009396.1|	hypothetical protein A9601_10051 [Prochlorococcus marinus str. AS9601] gb|ABM70289.1| Hypothetical protein A9601_10051 [Prochlorococcus marinus str. AS9601]	3e-05	emb|CAP16357.1|	Hypothetical protein [Prochlorococcus marinus subsp. pastoris str. CCMP1986]	4e-05	ref|YP_001484235.1|	hypothetical protein P9215_10341 [Prochlorococcus marinus str. MIT 9215] gb|ABV50649.1| Hypothetical protein P9215_10341 [Prochlorococcus marinus str. MIT 9215]	0.0001
IG0878f4	PMED4_09711	genomic islet 3	emb|CAP16418.1|	Hypothetical protein [Prochlorococcus marinus subsp. pastoris str. CCMP1986]	1e-19	gb|ABS83189.1|	Conserved hypothetical protein [Prochlorococcus marinus str. MIT 9312]	1e-13	ref|YP_001009663.1|	hypothetical protein A9601_12721 [Prochlorococcus marinus str. AS9601] gb|ABM70556.1| Hypothetical protein A9601_12721 [Prochlorococcus marinus str. AS9601]	9e-13	gb|ABE10911.1|	hypothetical protein ASNC3046_0015 [uncultured Prochlorococcus marinus clone ASNC3046]	2e-12	emb|CAP16334.1|	Hypothetical protein [Prochlorococcus marinus subsp. pastoris str. CCMP1986]	3e-12	ref|YP_001091503.1|	hypothetical protein P9301_12791 [Prochlorococcus marinus str. MIT 9301] gb|ABO17902.1| Conserved hypothetical protein [Prochlorococcus marinus str. MIT 9301]	1e-11	ref|YP_001484513.1|	hypothetical protein P9215_13121 [Prochlorococcus marinus str. MIT 9215] gb|ABV50927.1| Hypothetical protein P9215_13121 [Prochlorococcus marinus str. MIT 9215]	1e-10	emb|CAP16512.1|	Hypothetical protein [Prochlorococcus marinus subsp. pastoris str. CCMP1986]	1e-07
IG0977r7	PMED4_10681		emb|CAP16422.1|	Conserved hypothetical protein [Prochlorococcus marinus subsp. pastoris str. CCMP1986]	2e-18	ref|YP_001011354.1|	hypothetical protein P9515_10401 [Prochlorococcus marinus str. MIT 9515] gb|ABM72247.1| Conserved hypothetical protein [Prochlorococcus marinus str. MIT 9515]	1e-17	ref|YP_001009293.1|	hypothetical protein A9601_09021 [Prochlorococcus marinus str. AS9601] gb|ABM70186.1| Predicted protein [Prochlorococcus marinus str. AS9601]	6e-17	ref|YP_397338.1|	hypothetical protein PMT9312_0842 [Prochlorococcus marinus str. MIT 9312] gb|ABB49902.1| conserved hypothetical protein [Prochlorococcus marinus str. MIT 9312]	8e-17	ref|YP_001484133.1|	hypothetical protein P9215_09321 [Prochlorococcus marinus str. MIT 9215] gb|ABV50547.1| Conserved hypothetical protein [Prochlorococcus marinus str. MIT 9215]	2e-16	ref|YP_001091124.1|	hypothetical protein P9301_09001 [Prochlorococcus marinus str. MIT 9301] gb|ABO17523.1| Conserved hypothetical protein [Prochlorococcus marinus str. MIT 9301]	3e-16	ref|YP_001550565.1|	hypothetical protein P9211_06801 [Prochlorococcus marinus str. MIT 9211] gb|ABX08611.1| Conserved hypothetical protein [Prochlorococcus marinus str. MIT 9211]	5e-11	ref|YP_001014741.1|	hypothetical protein NATL1_09181 [Prochlorococcus marinus str. NATL1A] gb|ABM75476.1| Conserved hypothetical protein [Prochlorococcus marinus str. NATL1A]	1e-08	ref|NP_875125.1|	hypothetical protein Pro0733 [Prochlorococcus marinus subsp. marinus str. CCMP1375] gb|AAP99777.1| Predicted protein [Prochlorococcus marinus subsp. marinus str. CCMP1375]	2e-08	ref|YP_214484.1|	hypothetical protein PSSM2_253 [Cyanophage P-SSM2] gb|AAX44630.1| hypothetical protein PSSM2_253 [Cyanophage P-SSM2]	3e-08	ref|YP_291445.1|	hypothetical protein PMN2A_0250 [Prochlorococcus marinus str. NATL2A] gb|AAZ57742.1| conserved hypothetical protein [Prochlorococcus marinus str. NATL2A]	5e-08	ref|YP_399687.1|	hypothetical protein Synpcc7942_0668 [Synechococcus elongatus PCC 7942] gb|ABB56700.1| conserved hypothetical protein [Synechococcus elongatus PCC 7942]	3e-06	ref|ZP_01728807.1|	hypothetical protein CY0110_07674 [Cyanothece sp. CCY0110] gb|EAZ91822.1| hypothetical protein CY0110_07674 [Cyanothece sp. CCY0110]	0.0003	gb|ABB88925.1|	TcpA [Fremyella diplosiphon]	0.0003	ref|YP_001517003.1|	hypothetical protein AM1_2685 [Acaryochloris marina MBIC11017] gb|ABW27687.1| conserved domain protein [Acaryochloris marina MBIC11017]	0.0006	ref|YP_474154.1|	hypothetical protein CYA_0679 [Synechococcus sp. JA-3-3Ab] gb|ABC98891.1| conserved hypothetical protein [Synechococcus sp. JA-3-3Ab]
IG0977r2-4	PMED4_10691		emb|CAP16423.1|	Conserved hypothetical protein [Prochlorococcus marinus subsp. pastoris str. CCMP1986]	3e-15	ref|YP_001011355.1|	hypothetical protein P9515_10411 [Prochlorococcus marinus str. MIT 9515] gb|ABM72248.1| Conserved hypothetical protein [Prochlorococcus marinus str. MIT 9515]	1e-13	ref|YP_001009292.1|	hypothetical protein A9601_09011 [Prochlorococcus marinus str. AS9601] gb|ABM70185.1| Conserved hypothetical protein [Prochlorococcus marinus str. AS9601]	3e-13	ref|YP_001484132.1|	hypothetical protein P9215_09311 [Prochlorococcus marinus str. MIT 9215] gb|ABV50546.1| Conserved hypothetical protein [Prochlorococcus marinus str. MIT 9215]	4e-13	ref|YP_001091123.1|	hypothetical protein P9301_08991 [Prochlorococcus marinus str. MIT 9301] gb|ABO17522.1| Conserved hypothetical protein [Prochlorococcus marinus str. MIT 9301]	4e-13
IG1003f4-6	PMED4_11011		emb|CAP16429.1|	Conserved hypothetical protein [Prochlorococcus marinus subsp. pastoris str. CCMP1986]	7e-37	ref|YP_001011374.1|	hypothetical protein P9515_10601 [Prochlorococcus marinus str. MIT 9515] gb|ABM72267.1| Conserved hypothetical protein [Prochlorococcus marinus str. MIT 9515]	5e-32	ref|YP_001091285.1|	hypothetical protein P9301_10611 [Prochlorococcus marinus str. MIT 9301] gb|ABO17684.1| Conserved hypothetical protein [Prochlorococcus marinus str. MIT 9301]	4e-28	ref|YP_001009452.1|	hypothetical protein A9601_10611 [Prochlorococcus marinus str. AS9601] gb|ABM70345.1| Conserved hypothetical protein [Prochlorococcus marinus str. AS9601]	4e-28	ref|YP_001484293.1|	hypothetical protein P9215_10921 [Prochlorococcus marinus str. MIT 9215] gb|ABV50707.1| Conserved hypothetical protein [Prochlorococcus marinus str. MIT 9215]	5e-28	gb|ABS83154.1|	Conserved hypothetical protein [Prochlorococcus marinus str. MIT 9312]	2e-27	ref|YP_001014845.1|	hypothetical protein NATL1_10221 [Prochlorococcus marinus str. NATL1A] gb|ABM75580.1| Hypothetical protein NATL1_10221 [Prochlorococcus marinus str. NATL1A]	0.0008	ref|YP_001621541.1|	hypothetical protein PMN2A_1960 [Prochlorococcus marinus str. NATL2A] gb|ABU23894.1| Conserved hypothetical protein [Prochlorococcus marinus str. NATL2A]	0.007	ref|YP_001551057.1|	hypothetical protein P9211_11721 [Prochlorococcus marinus str. MIT 9211] gb|ABX09103.1| Hypothetical protein P9211_11721 [Prochlorococcus marinus str. MIT 9211]	0.026	ref|YP_001015282.1|	hypothetical protein NATL1_14591 [Prochlorococcus marinus str. NATL1A] gb|ABM76017.1| Hypothetical protein NATL1_14591 [Prochlorococcus marinus str. NATL1A]	0.045	ref|YP_291823.1|	hypothetical protein PMN2A_0629 [Prochlorococcus marinus str. NATL2A] gb|AAZ58120.1| hypothetical protein PMN2A_0629 [Prochlorococcus marinus str. NATL2A]	0.045
IG1003f9	PMED4_11021		emb|CAP16430.1|	Conserved hypothetical protein [Prochlorococcus marinus subsp. pastoris str. CCMP1986]	1e-33	ref|YP_001011375.1|	hypothetical protein P9515_10611 [Prochlorococcus marinus str. MIT 9515] gb|ABM72268.1| Conserved hypothetical protein [Prochlorococcus marinus str. MIT 9515]	4e-28	ref|YP_001484294.1|	hypothetical protein P9215_10931 [Prochlorococcus marinus str. MIT 9215] gb|ABV50708.1| Conserved hypothetical protein [Prochlorococcus marinus str. MIT 9215]	7e-27	ref|YP_001091286.1|	hypothetical protein P9301_10621 [Prochlorococcus marinus str. MIT 9301] gb|ABO17685.1| Conserved hypothetical protein [Prochlorococcus marinus str. MIT 9301]	5e-25	ref|YP_397485.1|	hypothetical protein PMT9312_0989 [Prochlorococcus marinus str. MIT 9312] gb|ABB50049.1| conserved hypothetical protein [Prochlorococcus marinus str. MIT 9312]	2e-24	ref|YP_001009453.1|	hypothetical protein A9601_10621 [Prochlorococcus marinus str. AS9601] gb|ABM70346.1| Hypothetical protein A9601_10621 [Prochlorococcus marinus str. AS9601]	4e-12	ref|YP_001551086.1|	hypothetical protein P9211_12011 [Prochlorococcus marinus str. MIT 9211] gb|ABX09132.1| Hypothetical protein P9211_12011 [Prochlorococcus marinus str. MIT 9211]	3e-08	ref|NP_875043.1|	hypothetical protein Pro0651 [Prochlorococcus marinus subsp. marinus str. CCMP1375] gb|AAP99695.1| Predicted protein [Prochlorococcus marinus subsp. marinus str. CCMP1375]	2e-06	ref|YP_291314.1|	hypothetical protein PMN2A_0119 [Prochlorococcus marinus str. NATL2A] gb|AAZ57611.1| conserved hypothetical protein [Prochlorococcus marinus str. NATL2A]	0.001	ref|YP_001014568.1|	hypothetical protein NATL1_07451 [Prochlorococcus marinus str. NATL1A] gb|ABM75303.1| Hypothetical protein NATL1_07451 [Prochlorococcus marinus str. NATL1A]	0.002
IG1015f5-6	PMED4_11171		emb|CAP16433.1|	Conserved hypothetical protein [Prochlorococcus marinus subsp. pastoris str. CCMP1986]	9e-22	ref|YP_001011389.1|	hypothetical protein P9515_10751 [Prochlorococcus marinus str. MIT 9515] gb|ABM72282.1| Conserved hypothetical protein [Prochlorococcus marinus str. MIT 9515]	2e-18	ref|YP_001009469.1|	hypothetical protein A9601_10781 [Prochlorococcus marinus str. AS9601] gb|ABM70362.1| Conserved hypothetical protein [Prochlorococcus marinus str. AS9601]	9e-14	ref|YP_001091302.1|	hypothetical protein P9301_10781 [Prochlorococcus marinus str. MIT 9301] gb|ABO17701.1| Conserved hypothetical protein [Prochlorococcus marinus str. MIT 9301]	2e-13	ref|YP_001484309.1|	hypothetical protein P9215_11081 [Prochlorococcus marinus str. MIT 9215] gb|ABV50723.1| Conserved hypothetical protein [Prochlorococcus marinus str. MIT 9215]	6e-13	gb|ABS83156.1|	Conserved hypothetical protein [Prochlorococcus marinus str. MIT 9312]	6e-13
IG1016f5-6	PMED4_11201		emb|CAP16435.1|	Conserved hypothetical protein [Prochlorococcus marinus subsp. pastoris str. CCMP1986]	1e-13	ref|YP_001009472.1|	hypothetical protein A9601_10811 [Prochlorococcus marinus str. AS9601] ref|YP_001091305.1| hypothetical protein P9301_10811 [Prochlorococcus marinus str. MIT 9301] gb|ABM70365.1| Conserved hypothetical protein [Prochlorococcus marinus str. AS9601] gb|ABO17704.1| Conserved hypothetical protein [Prochlorococcus marinus str. MIT 9301]	1e-12	ref|YP_001011392.1|	hypothetical protein P9515_10781 [Prochlorococcus marinus str. MIT 9515] gb|ABM72285.1| Conserved hypothetical protein [Prochlorococcus marinus str. MIT 9515]	4e-12	ref|NP_875578.1|	hypothetical protein Pro1186 [Prochlorococcus marinus subsp. marinus str. CCMP1375] gb|AAQ00231.1| Predicted protein [Prochlorococcus marinus subsp. marinus str. CCMP1375]	1e-05	ref|YP_001551059.1|	hypothetical protein P9211_11741 [Prochlorococcus marinus str. MIT 9211] gb|ABX09105.1| Hypothetical protein P9211_11741 [Prochlorococcus marinus str. MIT 9211]	1e-05
IG1017r4-5	PMED4_11221		emb|CAP16436.1|	Conserved hypothetical protein [Prochlorococcus marinus subsp. pastoris str. CCMP1986]	3e-18	ref|YP_001011394.1|	hypothetical protein P9515_10801 [Prochlorococcus marinus str. MIT 9515] gb|ABM72287.1| Conserved hypothetical protein [Prochlorococcus marinus str. MIT 9515]	8e-17	ref|YP_001484314.1|	hypothetical protein P9215_11131 [Prochlorococcus marinus str. MIT 9215] gb|ABV50728.1| Hypothetical protein P9215_11131 [Prochlorococcus marinus str. MIT 9215]	4e-14	ref|YP_001091308.1|	hypothetical protein P9301_10841 [Prochlorococcus marinus str. MIT 9301] gb|ABO17707.1| Hypothetical protein P9301_10841 [Prochlorococcus marinus str. MIT 9301]	4e-14	ref|YP_001009475.1|	hypothetical protein A9601_10841 [Prochlorococcus marinus str. AS9601] gb|ABM70368.1| Hypothetical protein A9601_10841 [Prochlorococcus marinus str. AS9601]	4e-14	ref|YP_397501.1|	hypothetical protein PMT9312_1005 [Prochlorococcus marinus str. MIT 9312] gb|ABB50065.1| conserved hypothetical protein [Prochlorococcus marinus str. MIT 9312]	1e-11	ref|NP_875084.1|	hypothetical protein Pro0692 [Prochlorococcus marinus subsp. marinus str. CCMP1375] gb|AAP99736.1| Predicted protein [Prochlorococcus marinus subsp. marinus str. CCMP1375]	4e-09	ref|YP_001550529.1|	hypothetical protein P9211_06441 [Prochlorococcus marinus str. MIT 9211] gb|ABX08575.1| Hypothetical protein P9211_06441 [Prochlorococcus marinus str. MIT 9211]	2e-08	ref|YP_291824.1|	hypothetical protein PMN2A_0630 [Prochlorococcus marinus str. NATL2A] ref|YP_001015283.1| hypothetical protein NATL1_14601 [Prochlorococcus marinus str. NATL1A] gb|AAZ58121.1| conserved hypothetical protein [Prochlorococcus marinus str. NATL2A] gb|ABM76018.1| Hypothetical protein NATL1_14601 [Prochlorococcus marinus str. NATL1A]	2e-06	gb|ABS83183.1|	Hypothetical protein PMT9312_1909 [Prochlorococcus marinus str. MIT 9312]	1e-05
IG1047f9	PMED4_11681		emb|CAP16453.1|	Conserved hypothetical protein [Prochlorococcus marinus subsp. pastoris str. CCMP1986]	2e-19	ref|YP_001091351.1|	hypothetical protein P9301_11271 [Prochlorococcus marinus str. MIT 9301] gb|ABO17750.1| Conserved hypothetical protein [Prochlorococcus marinus str. MIT 9301]	6e-08	gb|ABS83167.1|	Conserved hypothetical protein [Prochlorococcus marinus str. MIT 9312]	9e-08	ref|YP_001009518.1|	hypothetical protein A9601_11271 [Prochlorococcus marinus str. AS9601] gb|ABM70411.1| Conserved hypothetical protein [Prochlorococcus marinus str. AS9601]	6e-07	ref|YP_001484358.1|	hypothetical protein P9215_11571 [Prochlorococcus marinus str. MIT 9215] gb|ABV50772.1| Conserved hypothetical protein [Prochlorococcus marinus str. MIT 9215]	3e-05
IG1047f13	PMED4_11691		emb|CAP16454.1|	Conserved hypothetical protein [Prochlorococcus marinus subsp. pastoris str. CCMP1986]	2e-21	ref|YP_001091352.1|	hypothetical protein P9301_11281 [Prochlorococcus marinus str. MIT 9301] gb|ABO17751.1| Conserved hypothetical protein [Prochlorococcus marinus str. MIT 9301]	3e-10	ref|YP_001484359.1|	hypothetical protein P9215_11581 [Prochlorococcus marinus str. MIT 9215] gb|ABV50773.1| Conserved hypothetical protein [Prochlorococcus marinus str. MIT 9215]	1e-09	ref|YP_001009519.1|	hypothetical protein A9601_11281 [Prochlorococcus marinus str. AS9601] gb|ABM70412.1| Conserved hypothetical protein [Prochlorococcus marinus str. AS9601]	2e-09	gb|ABS83168.1|	Conserved hypothetical protein [Prochlorococcus marinus str. MIT 9312]	5e-09	ref|YP_001011434.1|	hypothetical protein P9515_11201 [Prochlorococcus marinus str. MIT 9515] gb|ABM72327.1| Conserved hypothetical protein [Prochlorococcus marinus str. MIT 9515]	3e-06
IG1054r19	PMED4_11781		emb|CAP16456.1|	Conserved hypothetical protein [Prochlorococcus marinus subsp. pastoris str. CCMP1986]	8e-30	ref|YP_001011443.1|	hypothetical protein P9515_11291 [Prochlorococcus marinus str. MIT 9515] gb|ABM72336.1| Conserved hypothetical protein [Prochlorococcus marinus str. MIT 9515]	4e-20	ref|YP_001091361.1|	hypothetical protein P9301_11371 [Prochlorococcus marinus str. MIT 9301] gb|ABO17760.1| Conserved hypothetical protein [Prochlorococcus marinus str. MIT 9301]	6e-18	ref|YP_001484368.1|	hypothetical protein P9215_11671 [Prochlorococcus marinus str. MIT 9215] gb|ABV50782.1| Hypothetical protein P9215_11671 [Prochlorococcus marinus str. MIT 9215]	1e-17	ref|YP_291688.1|	hypothetical protein PMN2A_0494 [Prochlorococcus marinus str. NATL2A] gb|AAZ57985.1| conserved hypothetical protein [Prochlorococcus marinus str. NATL2A]	2e-06
IG1054f8-13	PMED4_11782		NO HIT
IG1142r10	PMED4_12681		emb|CAP16459.1|	Conserved hypothetical protein [Prochlorococcus marinus subsp. pastoris str. CCMP1986]	2e-24	ref|YP_001009619.1|	hypothetical protein A9601_12281 [Prochlorococcus marinus str. AS9601] gb|ABM70512.1| Conserved hypothetical protein [Prochlorococcus marinus str. AS9601]	6e-15	ref|YP_001484459.1|	hypothetical protein P9215_12581 [Prochlorococcus marinus str. MIT 9215] gb|ABV50873.1| Conserved hypothetical protein [Prochlorococcus marinus str. MIT 9215]	9e-14	gb|ABS83174.1|	Conserved hypothetical protein [Prochlorococcus marinus str. MIT 9312]	1e-13	ref|YP_001011527.1|	hypothetical protein P9515_12131 [Prochlorococcus marinus str. MIT 9515] gb|ABM72420.1| Conserved hypothetical protein [Prochlorococcus marinus str. MIT 9515]	6e-13	ref|YP_001091452.1|	hypothetical protein P9301_12281 [Prochlorococcus marinus str. MIT 9301] gb|ABO17851.1| Conserved hypothetical protein [Prochlorococcus marinus str. MIT 9301]	1e-12
IG1148f1	PMED4_12742	GI 3	ref|NP_897659.1|	hypothetical protein SYNW1566 [Synechococcus sp. WH 8102] emb|CAE08081.1| hypothetical [Synechococcus sp. WH 8102]	3e-05	ref|NP_897670.1|	hypothetical protein SYNW1577 [Synechococcus sp. WH 8102] emb|CAE08092.1| hypothetical [Synechococcus sp. WH 8102]	3e-05	ref|NP_897278.1|	hypothetical protein SYNW1185 [Synechococcus sp. WH 8102] emb|CAE07700.1| hypothetical [Synechococcus sp. WH 8102]	3e-05	ref|NP_898500.1|	hypothetical protein SYNW2411 [Synechococcus sp. WH 8102] emb|CAE08926.1| hypothetical [Synechococcus sp. WH 8102]	0.0002	ref|NP_896459.1|	hypothetical protein SYNW0364 [Synechococcus sp. WH 8102] emb|CAE06879.1| hypothetical [Synechococcus sp. WH 8102]	0.002	ref|NP_897651.1|	hypothetical protein SYNW1558 [Synechococcus sp. WH 8102] emb|CAE08073.1| hypothetical [Synechococcus sp. WH 8102]	0.007	ref|NP_896478.1|	hypothetical protein SYNW0383 [Synechococcus sp. WH 8102] emb|CAE06898.1| hypothetical [Synechococcus sp. WH 8102]	0.026
IG1153r5-10	PMED4_12832	GI 3	NO HIT
IG1157r3	PMED4_12901		emb|CAP16467.1|	Conserved hypothetical protein [Prochlorococcus marinus subsp. pastoris str. CCMP1986]	9e-35	ref|YP_001011607.1|	hypothetical protein P9515_12931 [Prochlorococcus marinus str. MIT 9515] gb|ABM72500.1| Conserved hypothetical protein [Prochlorococcus marinus str. MIT 9515]	1e-29	gb|ABE10952.1|	hypothetical protein ASNC3046_0044 [uncultured Prochlorococcus marinus clone ASNC3046]	4e-28	ref|YP_001484538.1|	hypothetical protein P9215_13371 [Prochlorococcus marinus str. MIT 9215] gb|ABV50952.1| Conserved hypothetical protein [Prochlorococcus marinus str. MIT 9215]	1e-27	gb|ABS83201.1|	Conserved hypothetical protein [Prochlorococcus marinus str. MIT 9312]	1e-27	ref|YP_001009699.1|	hypothetical protein A9601_13081 [Prochlorococcus marinus str. AS9601] gb|ABM70592.1| Conserved hypothetical protein [Prochlorococcus marinus str. AS9601]	1e-27	ref|YP_001091546.1|	hypothetical protein P9301_13221 [Prochlorococcus marinus str. MIT 9301] gb|ABO17945.1| Conserved hypothetical protein [Prochlorococcus marinus str. MIT 9301]	7e-27
IG1159f7-10	PMED4_12941		emb|CAP16469.1|	Conserved hypothetical protein [Prochlorococcus marinus subsp. pastoris str. CCMP1986]	4e-19	gb|ABS83202.1|	Conserved hypothetical protein [Prochlorococcus marinus str. MIT 9312]	7e-18	ref|YP_001091549.1|	hypothetical protein P9301_13251 [Prochlorococcus marinus str. MIT 9301] gb|ABO17948.1| Conserved hypothetical protein [Prochlorococcus marinus str. MIT 9301]	7e-18	ref|YP_001009702.1|	hypothetical protein A9601_13111 [Prochlorococcus marinus str. AS9601] gb|ABM70595.1| Conserved hypothetical protein [Prochlorococcus marinus str. AS9601]	7e-18	ref|YP_001484541.1|	hypothetical protein P9215_13401 [Prochlorococcus marinus str. MIT 9215] gb|ABV50955.1| Conserved hypothetical protein [Prochlorococcus marinus str. MIT 9215]	6e-15	emb|CAP16367.1|	Conserved hypothetical protein [Prochlorococcus marinus subsp. pastoris str. CCMP1986]	7e-10	emb|CAP16444.1|	Conserved hypothetical protein [Prochlorococcus marinus subsp. pastoris str. CCMP1986]	0.0008	ref|YP_001015044.1|	hypothetical protein NATL1_12211 [Prochlorococcus marinus str. NATL1A] ref|YP_001621598.1| hypothetical protein PMN2A_2019 [Prochlorococcus marinus str. NATL2A] gb|ABM75779.1| Hypothetical protein NATL1_12211 [Prochlorococcus marinus str. NATL1A] gb|ABU23951.1| Conserved hypothetical protein [Prochlorococcus marinus str. NATL2A]	0.0008	ref|YP_001484342.1|	hypothetical protein P9215_11411 [Prochlorococcus marinus str. MIT 9215] gb|ABV50756.1| Conserved hypothetical protein [Prochlorococcus marinus str. MIT 9215]	0.005	ref|YP_001091335.1|	hypothetical protein P9301_11111 [Prochlorococcus marinus str. MIT 9301] gb|ABO17734.1| Conserved hypothetical protein [Prochlorococcus marinus str. MIT 9301] gb|ABS83161.1| Conserved hypothetical protein [Prochlorococcus marinus str. MIT 9312]	0.005	ref|YP_001009503.1|	hypothetical protein A9601_11121 [Prochlorococcus marinus str. AS9601] gb|ABM70396.1| Conserved hypothetical protein [Prochlorococcus marinus str. AS9601]	0.005
IG1159f12	PMED4_12951		emb|CAP16470.1|	Conserved hypothetical protein [Prochlorococcus marinus subsp. pastoris str. CCMP1986]	9e-24	ref|YP_001009703.1|	hypothetical protein A9601_13121 [Prochlorococcus marinus str. AS9601] ref|YP_001091550.1| hypothetical protein P9301_13261 [Prochlorococcus marinus str. MIT 9301] gb|ABM70596.1| Conserved hypothetical protein [Prochlorococcus marinus str. AS9601] gb|ABO17949.1| Conserved hypothetical protein [Prochlorococcus marinus str. MIT 9301]	3e-23	gb|ABS83203.1|	Conserved hypothetical protein [Prochlorococcus marinus str. MIT 9312]	4e-23	ref|YP_001484542.1|	hypothetical protein P9215_13411 [Prochlorococcus marinus str. MIT 9215] gb|ABV50956.1| Conserved hypothetical protein [Prochlorococcus marinus str. MIT 9215]	1e-19
IG1173r2-4	PMED4_13101		emb|CAP16471.1|	Conserved hypothetical protein [Prochlorococcus marinus subsp. pastoris str. CCMP1986]	5e-33	ref|YP_001011631.1|	hypothetical protein P9515_13171 [Prochlorococcus marinus str. MIT 9515] gb|ABM72524.1| hypothetical protein P9515_13171 [Prochlorococcus marinus str. MIT 9515]	3e-31	ref|YP_001009718.1|	hypothetical protein A9601_13271 [Prochlorococcus marinus str. AS9601] gb|ABM70611.1| Predicted protein [Prochlorococcus marinus str. AS9601]	9e-29	gb|ABE10978.1|	conserved hypothetical protein [uncultured Prochlorococcus marinus clone ASNC612]	9e-29	ref|YP_001091566.1|	hypothetical protein P9301_13421 [Prochlorococcus marinus str. MIT 9301] gb|ABO17965.1| hypothetical protein P9301_13421 [Prochlorococcus marinus str. MIT 9301]	4e-28	ref|YP_397744.1|	hypothetical protein PMT9312_1249 [Prochlorococcus marinus str. MIT 9312] gb|ABB50308.1| conserved hypothetical protein [Prochlorococcus marinus str. MIT 9312]	8e-28	ref|YP_001484558.1|	hypothetical protein P9215_13571 [Prochlorococcus marinus str. MIT 9215] gb|ABV50972.1| Conserved hypothetical protein [Prochlorococcus marinus str. MIT 9215]	7e-27	ref|NP_895002.1|	hypothetical protein PMT1172 [Prochlorococcus marinus str. MIT 9313] ref|YP_001016868.1| hypothetical protein P9303_08521 [Prochlorococcus marinus str. MIT 9303] emb|CAE21347.1| hypothetical [Prochlorococcus marinus str. MIT 9313] gb|ABM77603.1| hypothetical protein P9303_08521 [Prochlorococcus marinus str. MIT 9303]	2e-14	ref|ZP_01083920.1|	hypothetical protein WH5701_14376 [Synechococcus sp. WH 5701] gb|EAQ76000.1| hypothetical protein WH5701_14376 [Synechococcus sp. WH 5701]	3e-14	ref|YP_001551111.1|	hypothetical protein P9211_12261 [Prochlorococcus marinus str. MIT 9211] gb|ABX09157.1| Conserved hypothetical protein [Prochlorococcus marinus str. MIT 9211]	5e-14	ref|NP_875639.1|	hypothetical protein Pro1247 [Prochlorococcus marinus subsp. marinus str. CCMP1375] gb|AAQ00292.1| Predicted protein [Prochlorococcus marinus subsp. marinus str. CCMP1375]	9e-14	ref|YP_730118.1|	hypothetical protein sync_0905 [Synechococcus sp. CC9311] gb|ABI45260.1| conserved hypothetical protein [Synechococcus sp. CC9311]	1e-13	ref|ZP_01080713.1|	hypothetical protein RS9917_01547 [Synechococcus sp. RS9917] gb|EAQ69003.1| hypothetical protein RS9917_01547 [Synechococcus sp. RS9917]	1e-13	ref|YP_001015422.1|	hypothetical protein NATL1_16001 [Prochlorococcus marinus str. NATL1A] gb|ABM76157.1| hypothetical protein NATL1_16001 [Prochlorococcus marinus str. NATL1A]	2e-13	ref|YP_291954.1|	hypothetical protein PMN2A_0760 [Prochlorococcus marinus str. NATL2A] gb|AAZ58251.1| conserved hypothetical protein [Prochlorococcus marinus str. NATL2A]	9e-13	ref|ZP_01470443.1|	hypothetical protein RS9916_32062 [Synechococcus sp. RS9916] gb|EAU74238.1| hypothetical protein RS9916_32062 [Synechococcus sp. RS9916]
IG1174r1	PMED4_13121		gb|ABB50310.1|	cytochrome b6-F complex subunit VII [Prochlorococcus marinus str. MIT 9312]	2e-10	ref|YP_654190.1|	cytochrome b6f complex subunit PetM [Prochlorococcus marinus subsp. pastoris str. CCMP1986] ref|YP_001011633.1| cytochrome b6f complex subunit PetM [Prochlorococcus marinus str. MIT 9515] ref|YP_001009720.1| cytochrome b6f complex subunit PetM [Prochlorococcus marinus str. AS9601] ref|YP_397746.2| cytochrome b6f complex subunit PetM [Prochlorococcus marinus str. MIT 9312] sp|A2BXL5.1|PETM_PROM5 C…	8e-10	gb|ABE10976.1|	cytochrome B6-F complex subunit VII [uncultured Prochlorococcus marinus clone ASNC612]	2e-09	ref|YP_001091568.1|	cytochrome b6f complex subunit PetM [Prochlorococcus marinus str. MIT 9301] sp|A3PDZ2.1|PETM_PROM0 Cytochrome b6-f complex subunit 7 (Cytochrome b6-f complex subunit VII) (Cytochrome b6-f complex subunit petM) gb|ABO17967.1| cytochrome b6-F complex subunit VII [Prochlorococcus marinus str. MIT 9301]	2e-09	ref|YP_654193.1|	cytochrome b6f complex subunit PetM [Prochlorococcus marinus str. MIT 9313] ref|YP_001016866.1| cytochrome b6f complex subunit PetM [Prochlorococcus marinus str. MIT 9303] sp|A2C7Z1.1|PETM_PROM3 Cytochrome b6-f complex subunit 7 (Cytochrome b6-f complex subunit VII) (Cytochrome b6-f complex subunit petM) gb|ABM77601.1| cytochrome b6-F complex subunit VII [Prochlorococcus marinus str. MIT 9303]	2e-07	ref|YP_291956.1|	cytochrome b6f complex subunit PetM [Prochlorococcus marinus str. NATL2A] ref|YP_001015424.1| cytochrome b6f complex subunit PetM [Prochlorococcus marinus str. NATL1A] sp|A2C3U9.1|PETM_PROM1 Cytochrome b6-f complex subunit 7 (Cytochrome b6-f complex subunit VII) (Cytochrome b6-f complex subunit petM) sp|Q46JS5|PETM_PROMT Cytochrome b6-f complex subunit 7 (Cytochrome b6-f complex subunit VII) (Cyt…	5e-07	ref|ZP_01468373.1|	hypothetical protein BL107_15700 [Synechococcus sp. BL107] gb|EAU72266.1| hypothetical protein BL107_15700 [Synechococcus sp. BL107]	6e-07	ref|YP_730116.1|	cytochrome b6f complex subunit PetM [Synechococcus sp. CC9311] sp|Q0IBQ6.1|PETM_SYNS3 Cytochrome b6-f complex subunit 7 (Cytochrome b6-f complex subunit VII) (Cytochrome b6-f complex subunit petM) gb|ABI46120.1| Cytochrome B6-F complex subunit VII-related protein [Synechococcus sp. CC9311]	6e-07	ref|YP_376686.2|	cytochrome b6f complex subunit PetM [Synechococcus sp. CC9902] sp|Q3AZ35|PETM_SYNS9 Cytochrome b6-f complex subunit 7 (Cytochrome b6-f complex subunit VII) (Cytochrome b6-f complex subunit petM)	6e-07	gb|ABB25642.1|	hypothetical protein Syncc9902_0674 [Synechococcus sp. CC9902]	6e-07	ref|YP_654195.1|	cytochrome b6f complex subunit PetM [Synechococcus sp. WH 8102]	1e-06	ref|YP_001551113.1|	cytochrome b6-F complex subunit VII [Prochlorococcus marinus str. MIT 9211] gb|ABX09159.1| cytochrome b6-F complex subunit VII [Prochlorococcus marinus str. MIT 9211]	1e-06	ref|ZP_01470445.1|	hypothetical protein RS9916_32072 [Synechococcus sp. RS9916] gb|EAU74240.1| hypothetical protein RS9916_32072 [Synechococcus sp. RS9916]	1e-06	ref|YP_654180.1|	cytochrome b6f complex subunit PetM [Synechococcus sp. CC9605]	1e-06	ref|YP_001225364.1|	cytochrome b6f complex subunit PetM [Synechococcus sp. WH 7803] sp|A5GMA2.1|PETM_SYNPW Cytochrome b6-f complex subunit 7 (Cytochrome b6-f complex subunit VII) (Cytochrome b6-f complex subunit petM) emb|CAK24067.1| Cytochrome B6-F complex subunit VII [Synechococcus sp. WH 7803]	2e-06	ref|YP_001227945.1|	cytochrome b6f complex subunit PetM [Synechococcus sp. RCC307] sp|A5GUN3.1|PETM_SYNR3 Cytochrome b6-f complex subunit 7 (Cytochrome b6-f complex subunit VII) (Cytochrome b6-f complex subunit petM) emb|CAK28592.1| Cytochrome B6-F complex subunit VII [Synechococcus sp. RCC307]
IG1185f8-14	PMED4_13271	genomic islet 5	emb|CAP16475.1|	Hypothetical protein [Prochlorococcus marinus subsp. pastoris str. CCMP1986]	1e-23	ref|YP_001010457.1|	hypothetical protein P9515_01411 [Prochlorococcus marinus str. MIT 9515] gb|ABM71350.1| Hypothetical protein P9515_01411 [Prochlorococcus marinus str. MIT 9515]	5e-19	ref|YP_001091584.1|	hypothetical protein P9301_13601 [Prochlorococcus marinus str. MIT 9301] gb|ABO17983.1| Hypothetical protein P9301_13601 [Prochlorococcus marinus str. MIT 9301]	6e-18	ref|YP_001013897.1|	hypothetical protein NATL1_00681 [Prochlorococcus marinus str. NATL1A] gb|ABM74632.1| Hypothetical protein NATL1_00681 [Prochlorococcus marinus str. NATL1A]	4e-05
IG1322r8-10	PMED4_14671		emb|CAP16478.1|	Conserved hypothetical protein [Prochlorococcus marinus subsp. pastoris str. CCMP1986]	8e-15	ref|YP_001091710.1|	hypothetical protein P9301_14861 [Prochlorococcus marinus str. MIT 9301] gb|ABO18109.1| Conserved hypothetical protein [Prochlorococcus marinus str. MIT 9301]	1e-05	ref|YP_001484728.1|	hypothetical protein P9215_15291 [Prochlorococcus marinus str. MIT 9215] gb|ABV51142.1| Conserved hypothetical protein [Prochlorococcus marinus str. MIT 9215]	4e-05
IG1389r2	PMED4_15322		ref|YP_001009669.1|	possible Fumarate reductase subunit D [Prochlorococcus marinus str. AS9601] ref|YP_001091509.1| possible Fumarate reductase subunit D [Prochlorococcus marinus str. MIT 9301] gb|ABM70562.1| possible Fumarate reductase subunit D [Prochlorococcus marinus str. AS9601] gb|ABO17908.1| possible Fumarate reductase subunit D [Prochlorococcus marinus str. MIT 9301]	4e-06	gb|ABE10915.1|	putative fumarate reductase subunit D [uncultured Prochlorococcus marinus clone ASNC3046]	9e-05	ref|YP_397709.1|	fumarate reductase subunit D-like [Prochlorococcus marinus str. MIT 9312] gb|ABB50273.1| fumarate reductase subunit D-like protein [Prochlorococcus marinus str. MIT 9312]	0.0001	ref|NP_893537.1|	possible Fumarate reductase subunit D [Prochlorococcus marinus subsp. pastoris str. CCMP1986] emb|CAE19879.1| possible Fumarate reductase subunit D [Prochlorococcus marinus subsp. pastoris str. CCMP1986]	0.0003	ref|YP_001224732.1|	hypothetical protein SynWH7803_1009 [Synechococcus sp. WH 7803] emb|CAK23435.1| Uncharacterized conserved membrane protein [Synechococcus sp. WH 7803]	0.009	ref|YP_001227880.1|	hypothetical protein SynRCC307_1624 [Synechococcus sp. RCC307] emb|CAK28527.1| Uncharacterized conserved membrane protein [Synechococcus sp. RCC307]	0.012	ref|YP_291647.1|	possible fumarate reductase subunit D [Prochlorococcus marinus str. NATL2A] gb|AAZ57944.1| possible fumarate reductase subunit D [Prochlorococcus marinus str. NATL2A]	0.012	ref|YP_397997.1|	fumarate reductase subunit D-like [Prochlorococcus marinus str. MIT 9312] gb|ABB50561.1| fumarate reductase subunit D-like protein [Prochlorococcus marinus str. MIT 9312]	0.015	ref|ZP_01086383.1|	hypothetical protein WH5701_10664 [Synechococcus sp. WH 5701] gb|EAQ73792.1| hypothetical protein WH5701_10664 [Synechococcus sp. WH 5701]	0.026
IG1393r3	PMED4_15371		emb|CAP16482.1|	Conserved hypothetical protein [Prochlorococcus marinus subsp. pastoris str. CCMP1986]	5e-15	ref|YP_001011846.1|	hypothetical protein P9515_15321 [Prochlorococcus marinus str. MIT 9515] gb|ABM72739.1| Conserved hypothetical protein [Prochlorococcus marinus str. MIT 9515]	2e-12	ref|YP_001091778.1|	hypothetical protein P9301_15541 [Prochlorococcus marinus str. MIT 9301] ref|YP_001484796.1| hypothetical protein P9215_15971 [Prochlorococcus marinus str. MIT 9215] gb|ABO18177.1| Conserved hypothetical protein [Prochlorococcus marinus str. MIT 9301] gb|ABV51210.1| Conserved hypothetical protein [Prochlorococcus marinus str. MIT 9215]	2e-10	ref|YP_001009959.1|	hypothetical protein A9601_15691 [Prochlorococcus marinus str. AS9601] gb|ABM70852.1| Conserved hypothetical protein [Prochlorococcus marinus str. AS9601]	6e-10	gb|ABS83209.1|	Conserved hypothetical protein [Prochlorococcus marinus str. MIT 9312]	8e-10	ref|YP_001014722.1|	hypothetical protein NATL1_08991 [Prochlorococcus marinus str. NATL1A] gb|ABM75457.1| Hypothetical protein NATL1_08991 [Prochlorococcus marinus str. NATL1A]	2e-05	ref|YP_291427.1|	hypothetical protein PMN2A_0232 [Prochlorococcus marinus str. NATL2A] gb|AAZ57724.1| conserved hypothetical protein [Prochlorococcus marinus str. NATL2A]	0.0001	ref|YP_001550618.1|	hypothetical protein P9211_07331 [Prochlorococcus marinus str. MIT 9211] gb|ABX08664.1| Hypothetical protein P9211_07331 [Prochlorococcus marinus str. MIT 9211]	0.001	ref|NP_874992.1|	hypothetical protein Pro0599 [Prochlorococcus marinus subsp. marinus str. CCMP1375] gb|AAP99644.1| Predicted protein [Prochlorococcus marinus subsp. marinus str. CCMP1375]	0.001	ref|YP_731010.1|	hypothetical protein sync_1806 [Synechococcus sp. CC9311] gb|ABI47805.1| conserved hypothetical protein [Synechococcus sp. CC9311]	0.002	ref|YP_001228246.1|	hypothetical protein SynRCC307_1990 [Synechococcus sp. RCC307] emb|CAK28893.1| Conserved hypothetical protein [Synechococcus sp. RCC307]	0.007	ref|YP_001017368.1|	hypothetical protein P9303_13561 [Prochlorococcus marinus str. MIT 9303] gb|ABM78103.1| Hypothetical protein P9303_13561 [Prochlorococcus marinus str. MIT 9303]	0.044
IG1397f8-12	PMED4_15421		emb|CAP16483.1|	Conserved hypothetical protein [Prochlorococcus marinus subsp. pastoris str. CCMP1986]	5e-38	ref|YP_001011851.1|	hypothetical protein P9515_15371 [Prochlorococcus marinus str. MIT 9515] gb|ABM72744.1| Conserved hypothetical protein [Prochlorococcus marinus str. MIT 9515]	1e-32	ref|YP_001091783.1|	hypothetical protein P9301_15591 [Prochlorococcus marinus str. MIT 9301] gb|ABO18182.1| Conserved hypothetical protein [Prochlorococcus marinus str. MIT 9301]	3e-31	ref|YP_001484801.1|	hypothetical protein P9215_16021 [Prochlorococcus marinus str. MIT 9215] gb|ABV51215.1| Conserved hypothetical protein [Prochlorococcus marinus str. MIT 9215]	8e-31	gb|ABS83210.1|	Conserved hypothetical protein [Prochlorococcus marinus str. MIT 9312]	1e-30	ref|YP_001009964.1|	hypothetical protein A9601_15741 [Prochlorococcus marinus str. AS9601] gb|ABM70857.1| Conserved hypothetical protein [Prochlorococcus marinus str. AS9601]	4e-30
IG1398f2-6	PMED4_15442		ref|YP_001484803.1|	hypothetical protein P9215_16041 [Prochlorococcus marinus str. MIT 9215] gb|ABV51217.1| Hypothetical protein P9215_16041 [Prochlorococcus marinus str. MIT 9215]	6e-10	ref|YP_001009966.1|	hypothetical protein A9601_15761 [Prochlorococcus marinus str. AS9601] gb|ABM70859.1| Hypothetical protein A9601_15761 [Prochlorococcus marinus str. AS9601]	2e-09	gb|ABS83211.1|	Conserved hypothetical protein [Prochlorococcus marinus str. MIT 9312]	1e-08	ref|YP_001091785.1|	hypothetical protein P9301_15611 [Prochlorococcus marinus str. MIT 9301] gb|ABO18184.1| Conserved hypothetical protein [Prochlorococcus marinus str. MIT 9301]	1e-08
IG1398r3	PMED4_15451		emb|CAP16485.1|	Conserved hypothetical protein [Prochlorococcus marinus subsp. pastoris str. CCMP1986]	1e-16	ref|YP_001011854.1|	hypothetical protein P9515_15401 [Prochlorococcus marinus str. MIT 9515] gb|ABM72747.1| Conserved hypothetical protein [Prochlorococcus marinus str. MIT 9515]	3e-15	gb|ABS83212.1|	Conserved hypothetical protein [Prochlorococcus marinus str. MIT 9312]	6e-12	ref|YP_001484804.1|	hypothetical protein P9215_16051 [Prochlorococcus marinus str. MIT 9215] gb|ABV51218.1| Conserved hypothetical protein [Prochlorococcus marinus str. MIT 9215]	2e-11	ref|YP_001091786.1|	hypothetical protein P9301_15621 [Prochlorococcus marinus str. MIT 9301] gb|ABO18185.1| Conserved hypothetical protein [Prochlorococcus marinus str. MIT 9301]	3e-11	ref|NP_875926.1|	Predicted protein family PM-23 [Prochlorococcus marinus subsp. marinus str. CCMP1375] gb|AAQ00579.1| Predicted protein family PM-23 [Prochlorococcus marinus subsp. marinus str. CCMP1375]	0.015
IG1399f3	PMED4_15471		emb|CAP16486.1|	Conserved hypothetical protein [Prochlorococcus marinus subsp. pastoris str. CCMP1986]	4e-26	ref|YP_001011855.1|	hypothetical protein P9515_15411 [Prochlorococcus marinus str. MIT 9515] gb|ABM72748.1| Hypothetical protein P9515_15411 [Prochlorococcus marinus str. MIT 9515]	5e-19	ref|YP_001009969.1|	hypothetical protein A9601_15791 [Prochlorococcus marinus str. AS9601] gb|ABM70862.1| Conserved hypothetical protein [Prochlorococcus marinus str. AS9601]	3e-17	ref|YP_001484806.1|	hypothetical protein P9215_16071 [Prochlorococcus marinus str. MIT 9215] gb|ABV51220.1| Conserved hypothetical protein [Prochlorococcus marinus str. MIT 9215]	6e-17	ref|YP_001091788.1|	hypothetical protein P9301_15641 [Prochlorococcus marinus str. MIT 9301] gb|ABO18187.1| Conserved hypothetical protein [Prochlorococcus marinus str. MIT 9301]	6e-17	gb|ABS83213.1|	Conserved hypothetical protein [Prochlorococcus marinus str. MIT 9312]	5e-16	ref|YP_001621561.1|	hypothetical protein PMN2A_1981 [Prochlorococcus marinus str. NATL2A] gb|ABU23914.1| Conserved hypothetical protein [Prochlorococcus marinus str. NATL2A]	2e-06	ref|YP_001014931.1|	hypothetical protein NATL1_11081 [Prochlorococcus marinus str. NATL1A] gb|ABM75666.1| Hypothetical protein NATL1_11081 [Prochlorococcus marinus str. NATL1A]	2e-06	ref|YP_001550522.1|	hypothetical protein P9211_06371 [Prochlorococcus marinus str. MIT 9211] gb|ABX08568.1| Hypothetical protein P9211_06371 [Prochlorococcus marinus str. MIT 9211]	0.003
IG1399r26	PMED4_15481		emb|CAP16487.1|	Conserved hypothetical protein [Prochlorococcus marinus subsp. pastoris str. CCMP1986]	7e-26	ref|YP_001009970.1|	hypothetical protein A9601_15801 [Prochlorococcus marinus str. AS9601] gb|ABM70863.1| Conserved hypothetical protein [Prochlorococcus marinus str. AS9601]	7e-10	ref|YP_001091789.1|	hypothetical protein P9301_15651 [Prochlorococcus marinus str. MIT 9301] gb|ABO18188.1| Conserved hypothetical protein [Prochlorococcus marinus str. MIT 9301]	1e-09	ref|YP_001484807.1|	hypothetical protein P9215_16081 [Prochlorococcus marinus str. MIT 9215] gb|ABV51221.1| Conserved hypothetical protein [Prochlorococcus marinus str. MIT 9215]	2e-09	gb|ABS83214.1|	Conserved hypothetical protein [Prochlorococcus marinus str. MIT 9312]	2e-09	ref|YP_001011856.1|	hypothetical protein P9515_15421 [Prochlorococcus marinus str. MIT 9515] gb|ABM72749.1| Hypothetical protein P9515_15421 [Prochlorococcus marinus str. MIT 9515]	1e-07
IG1399f16	PMED4_15491		emb|CAP16488.1|	Conserved hypothetical protein [Prochlorococcus marinus subsp. pastoris str. CCMP1986]	2e-27	ref|YP_001011857.1|	hypothetical protein P9515_15431 [Prochlorococcus marinus str. MIT 9515] gb|ABM72750.1| Hypothetical protein P9515_15431 [Prochlorococcus marinus str. MIT 9515]	3e-24	ref|YP_001009971.1|	hypothetical protein A9601_15811 [Prochlorococcus marinus str. AS9601] gb|ABM70864.1| Conserved hypothetical protein [Prochlorococcus marinus str. AS9601]	7e-21	ref|YP_001484808.1|	hypothetical protein P9215_16091 [Prochlorococcus marinus str. MIT 9215] gb|ABV51222.1| Conserved hypothetical protein [Prochlorococcus marinus str. MIT 9215]	4e-20	gb|ABS83215.1|	Conserved hypothetical protein [Prochlorococcus marinus str. MIT 9312]	6e-20	ref|YP_001091790.1|	hypothetical protein P9301_15661 [Prochlorococcus marinus str. MIT 9301] gb|ABO18189.1| Conserved hypothetical protein [Prochlorococcus marinus str. MIT 9301]	2e-19	ref|YP_214742.1|	hypothetical protein PSSM4_181 [Cyanophage P-SSM4] gb|AAX46982.1| hypothetical protein PSSM4_181 [Cyanophage P-SSM4]	2e-09	ref|NP_875908.1|	hypothetical protein Pro1517 [Prochlorococcus marinus subsp. marinus str. CCMP1375] gb|AAQ00561.1| Predicted protein [Prochlorococcus marinus subsp. marinus str. CCMP1375]	4e-06	ref|YP_214509.1|	hypothetical protein PSSM2_278 [Cyanophage P-SSM2] gb|AAX44655.1| hypothetical protein PSSM2_278 [Cyanophage P-SSM2]	9e-06	ref|YP_291625.1|	hypothetical protein PMN2A_0430 [Prochlorococcus marinus str. NATL2A] ref|YP_001014958.1| hypothetical protein NATL1_11351 [Prochlorococcus marinus str. NATL1A] gb|AAZ57922.1| hypothetical protein PMN2A_0430 [Prochlorococcus marinus str. NATL2A] gb|ABM75693.1| Hypothetical protein NATL1_11351 [Prochlorococcus marinus str. NATL1A]	1e-05
IG1399f28-29	PMED4_15511		emb|CAP16490.1|	Conserved hypothetical protein [Prochlorococcus marinus subsp. pastoris str. CCMP1986]	2e-24	ref|YP_001011859.1|	hypothetical protein P9515_15451 [Prochlorococcus marinus str. MIT 9515] gb|ABM72752.1| Hypothetical protein P9515_15451 [Prochlorococcus marinus str. MIT 9515]	1e-16	ref|YP_001091791.1|	hypothetical protein P9301_15671 [Prochlorococcus marinus str. MIT 9301] gb|ABO18190.1| Conserved hypothetical protein [Prochlorococcus marinus str. MIT 9301]	5e-07	ref|YP_001009972.1|	hypothetical protein A9601_15821 [Prochlorococcus marinus str. AS9601] gb|ABM70865.1| Conserved hypothetical protein [Prochlorococcus marinus str. AS9601]	1e-06	gb|ABS83216.1|	Conserved hypothetical protein [Prochlorococcus marinus str. MIT 9312]	1e-06	ref|YP_001484809.1|	hypothetical protein P9215_16101 [Prochlorococcus marinus str. MIT 9215] gb|ABV51223.1| Hypothetical protein P9215_16101 [Prochlorococcus marinus str. MIT 9215]	0.0003
IG1405r20-23	PMED4_15601	GI 5	emb|CAP16493.1|	Conserved hypothetical protein [Prochlorococcus marinus subsp. pastoris str. CCMP1986]	7e-21	ref|YP_001009978.1|	hypothetical protein A9601_15881 [Prochlorococcus marinus str. AS9601] gb|ABM70871.1| Conserved hypothetical protein [Prochlorococcus marinus str. AS9601]	8e-18	ref|YP_001091797.1|	hypothetical protein P9301_15731 [Prochlorococcus marinus str. MIT 9301] gb|ABO18196.1| Conserved hypothetical protein [Prochlorococcus marinus str. MIT 9301]	2e-17	ref|YP_001484814.1|	hypothetical protein P9215_16151 [Prochlorococcus marinus str. MIT 9215] gb|ABV51228.1| Conserved hypothetical protein [Prochlorococcus marinus str. MIT 9215]	2e-17	gb|ABS83218.1|	Conserved hypothetical protein [Prochlorococcus marinus str. MIT 9312]	4e-17	ref|YP_001011867.1|	hypothetical protein P9515_15531 [Prochlorococcus marinus str. MIT 9515] gb|ABM72760.1| Hypothetical protein P9515_15531 [Prochlorococcus marinus str. MIT 9515]	4e-14	ref|YP_001015729.1|	hypothetical protein NATL1_19091 [Prochlorococcus marinus str. NATL1A] ref|YP_001621735.1| hypothetical protein PMN2A_2168 [Prochlorococcus marinus str. NATL2A] gb|ABM76465.1| Hypothetical protein NATL1_19091 [Prochlorococcus marinus str. NATL1A] gb|ABU24088.1| Conserved hypothetical protein [Prochlorococcus marinus str. NATL2A]	0.015
IG1405f7-10	PMED4_15611	GI 5	emb|CAP16494.1|	Conserved hypothetical protein [Prochlorococcus marinus subsp. pastoris str. CCMP1986]	3e-35	ref|YP_001011868.1|	hypothetical protein P9515_15541 [Prochlorococcus marinus str. MIT 9515] gb|ABM72761.1| Conserved hypothetical protein [Prochlorococcus marinus str. MIT 9515]	4e-26	ref|NP_875034.1|	hypothetical protein Pro0642 [Prochlorococcus marinus subsp. marinus str. CCMP1375] gb|AAP99686.1| Predicted protein [Prochlorococcus marinus subsp. marinus str. CCMP1375]	5e-09	ref|YP_001483989.1|	possible DDT domain [Prochlorococcus marinus str. MIT 9215] gb|ABV50403.1| possible DDT domain [Prochlorococcus marinus str. MIT 9215]	7e-08	ref|YP_001015091.1|	hypothetical protein NATL1_12681 [Prochlorococcus marinus str. NATL1A] gb|ABM75826.1| Hypothetical protein NATL1_12681 [Prochlorococcus marinus str. NATL1A]	2e-07	ref|YP_001009147.1|	possible DDT domain-containing protein [Prochlorococcus marinus str. AS9601] gb|ABM70040.1| possible DDT domain-containing protein [Prochlorococcus marinus str. AS9601]	3e-07	ref|YP_001090976.1|	possible DDT domain-containing protein [Prochlorococcus marinus str. MIT 9301] gb|ABO17375.1| possible DDT domain-containing protein [Prochlorococcus marinus str. MIT 9301]	3e-07	ref|YP_291721.1|	hypothetical protein PMN2A_0527 [Prochlorococcus marinus str. NATL2A] gb|AAZ58018.1| conserved hypothetical protein [Prochlorococcus marinus str. NATL2A]	3e-06	ref|YP_397199.1|	DDT domain protein-like [Prochlorococcus marinus str. MIT 9312] gb|ABB49763.1| DDT domain protein-like protein [Prochlorococcus marinus str. MIT 9312]	4e-06	ref|YP_001011197.1|	possible DDT domain [Prochlorococcus marinus str. MIT 9515] gb|ABM72090.1| possible DDT domain [Prochlorococcus marinus str. MIT 9515]	9e-06	ref|NP_892810.1|	possible DDT domain [Prochlorococcus marinus subsp. pastoris str. CCMP1986] emb|CAE19151.1| possible DDT domain [Prochlorococcus marinus subsp. pastoris str. CCMP1986]	1e-05
IG1405f15-17	PMED4_15621	GI 5	emb|CAP16495.1|	Conserved hypothetical protein [Prochlorococcus marinus subsp. pastoris str. CCMP1986]	1e-23	ref|YP_001011869.1|	hypothetical protein P9515_15551 [Prochlorococcus marinus str. MIT 9515] gb|ABM72762.1| Conserved hypothetical protein [Prochlorococcus marinus str. MIT 9515]	6e-21	ref|YP_397970.1|	hypothetical protein PMT9312_1474 [Prochlorococcus marinus str. MIT 9312] gb|ABB50534.1| conserved hypothetical protein [Prochlorococcus marinus str. MIT 9312]	1e-14	ref|YP_001009979.1|	hypothetical protein A9601_15891 [Prochlorococcus marinus str. AS9601] gb|ABM70872.1| Conserved hypothetical protein [Prochlorococcus marinus str. AS9601]	4e-14	ref|NP_875835.1|	hypothetical protein Pro1444 [Prochlorococcus marinus subsp. marinus str. CCMP1375] gb|AAQ00488.1| Predicted protein [Prochlorococcus marinus subsp. marinus str. CCMP1375]	8e-07	ref|YP_001551302.1|	hypothetical protein P9211_14171 [Prochlorococcus marinus str. MIT 9211] gb|ABX09348.1| Hypothetical protein P9211_14171 [Prochlorococcus marinus str. MIT 9211]	3e-06	gb|ABS83089.1|	Conserved hypothetical protein [Prochlorococcus marinus str. MIT 9312]	0.0006	ref|ZP_01472511.1|	hypothetical protein RS9916_26864 [Synechococcus sp. RS9916] gb|EAU73202.1| hypothetical protein RS9916_26864 [Synechococcus sp. RS9916]	0.0008	ref|YP_001008500.1|	hypothetical protein A9601_01051 [Prochlorococcus marinus str. AS9601] gb|ABM69393.1| Conserved hypothetical protein [Prochlorococcus marinus str. AS9601]	0.001	ref|YP_001226634.1|	hypothetical protein SynRCC307_0378 [Synechococcus sp. RCC307] emb|CAK27281.1| Conserved hypothetical protein [Synechococcus sp. RCC307]	0.002	ref|YP_001010417.1|	hypothetical protein P9515_01011 [Prochlorococcus marinus str. MIT 9515] gb|ABM71310.1| Conserved hypothetical protein [Prochlorococcus marinus str. MIT 9515]	0.004	ref|YP_001016267.1|	hypothetical protein P9303_02471 [Prochlorococcus marinus str. MIT 9303] gb|ABM77002.1| Conserved hypothetical protein [Prochlorococcus marinus str. MIT 9303]	0.007	ref|ZP_01084254.1|	hypothetical protein WH5701_16046 [Synechococcus sp. WH 5701] gb|EAQ76334.1| hypothetical protein WH5701_16046 [Synechococcus sp. WH 5701]	0.007	ref|ZP_01081093.1|	hypothetical protein RS9917_07515 [Synechococcus sp. RS9917] gb|EAQ68277.1| hypothetical protein RS9917_07515 [Synechococcus sp. RS9917]	0.007	ref|YP_001225909.1|	hypothetical protein SynWH7803_2186 [Synechococcus sp. WH 7803] emb|CAK24612.1| Conserved hypothetical protein [Synechococcus sp. WH 7803]	0.015	ref|YP_001090327.1|	hypothetical protein P9301_01031 [Prochlorococcus marinus str. MIT 9301] gb|ABO16726.1| Conserved hypothetical protein [Prochlorococcus marinus str. MIT 9301]
IG1405f20-21	PMED4_15631	GI 5	emb|CAP16496.1|	Conserved hypothetical protein [Prochlorococcus marinus subsp. pastoris str. CCMP1986]	3e-21	ref|YP_001011870.1|	hypothetical protein P9515_15561 [Prochlorococcus marinus str. MIT 9515] gb|ABM72763.1| Conserved hypothetical protein [Prochlorococcus marinus str. MIT 9515]	2e-18	ref|YP_001091798.1|	hypothetical protein P9301_15741 [Prochlorococcus marinus str. MIT 9301] gb|ABO18197.1| Conserved hypothetical protein [Prochlorococcus marinus str. MIT 9301]	2e-17	ref|YP_001484815.1|	hypothetical protein P9215_16161 [Prochlorococcus marinus str. MIT 9215] gb|ABV51229.1| Conserved hypothetical protein [Prochlorococcus marinus str. MIT 9215]	5e-16	ref|YP_001009980.1|	hypothetical protein A9601_15901 [Prochlorococcus marinus str. AS9601] gb|ABM70873.1| Conserved hypothetical protein [Prochlorococcus marinus str. AS9601]	7e-16	ref|YP_397971.1|	hypothetical protein PMT9312_1475 [Prochlorococcus marinus str. MIT 9312] gb|ABB50535.1| conserved hypothetical protein [Prochlorococcus marinus str. MIT 9312]	9e-16	ref|YP_001017244.1|	hypothetical protein P9303_12301 [Prochlorococcus marinus str. MIT 9303] gb|ABM77979.1| Hypothetical protein P9303_12301 [Prochlorococcus marinus str. MIT 9303]	1e-08	ref|YP_001484475.1|	hypothetical protein P9215_12741 [Prochlorococcus marinus str. MIT 9215] gb|ABV50889.1| Hypothetical protein P9215_12741 [Prochlorococcus marinus str. MIT 9215]	2e-08	ref|ZP_01467904.1|	hypothetical protein BL107_13355 [Synechococcus sp. BL107] gb|EAU71797.1| hypothetical protein BL107_13355 [Synechococcus sp. BL107]	2e-08	ref|YP_377195.1|	hypothetical protein Syncc9902_1187 [Synechococcus sp. CC9902] gb|ABB26151.1| hypothetical protein Syncc9902_1187 [Synechococcus sp. CC9902]	2e-08	ref|YP_001551256.1|	hypothetical protein P9211_13711 [Prochlorococcus marinus str. MIT 9211] gb|ABX09302.1| Hypothetical protein P9211_13711 [Prochlorococcus marinus str. MIT 9211]	4e-08	ref|NP_874801.1|	hypothetical protein Pro0407 [Prochlorococcus marinus subsp. marinus str. CCMP1375] gb|AAP99453.1| Predicted protein [Prochlorococcus marinus subsp. marinus str. CCMP1375]	4e-07	ref|YP_291748.1|	hypothetical protein PMN2A_0554 [Prochlorococcus marinus str. NATL2A] gb|AAZ58045.1| hypothetical protein PMN2A_0554 [Prochlorococcus marinus str. NATL2A]	1e-06	ref|YP_001015144.1|	hypothetical protein NATL1_13211 [Prochlorococcus marinus str. NATL1A] gb|ABM75879.1| Hypothetical protein NATL1_13211 [Prochlorococcus marinus str. NATL1A]	1e-06	ref|NP_897258.1|	hypothetical protein SYNW1165 [Synechococcus sp. WH 8102] emb|CAE07680.1| hypothetical [Synechococcus sp. WH 8102]	1e-06	ref|YP_001015564.1|	hypothetical protein NATL1_17441 [Prochlorococcus marinus str. NATL1A] gb|ABM76300.1| Hypothetical protein NATL1_17441 [Prochlorococcus marinus str. NATL1A]
IG1406f15	PMED4_15652	GI 5	NO HIT
IG1408f2	PMED4_15681	GI 5	emb|CAP16498.1|	Hypothetical protein [Prochlorococcus marinus subsp. pastoris str. CCMP1986]	1e-15	gb|ABS83194.1|	Conserved hypothetical protein [Prochlorococcus marinus str. MIT 9312]	0.0002	ref|YP_001091515.1|	hypothetical protein P9301_12911 [Prochlorococcus marinus str. MIT 9301] gb|ABO17914.1| Conserved hypothetical protein [Prochlorococcus marinus str. MIT 9301]	0.0003	ref|YP_001009675.1|	hypothetical protein A9601_12841 [Prochlorococcus marinus str. AS9601] gb|ABM70568.1| Hypothetical protein A9601_12841 [Prochlorococcus marinus str. AS9601]	0.0006
IG1410r21	PMED4_15712	GI 5	ref|YP_397974.1|	hypothetical protein PMT9312_1478 [Prochlorococcus marinus str. MIT 9312] gb|ABB50538.1| hypothetical protein PMT9312_1478 [Prochlorococcus marinus str. MIT 9312]	1e-14
IG1410f15-22	PMED4_15721	GI 5	emb|CAP16500.1|	Conserved hypothetical protein [Prochlorococcus marinus subsp. pastoris str. CCMP1986]	5e-17	ref|YP_001011877.1|	hypothetical protein P9515_15631 [Prochlorococcus marinus str. MIT 9515] gb|ABM72770.1| Conserved hypothetical protein [Prochlorococcus marinus str. MIT 9515]	9e-13	gb|ABS83233.1|	Conserved hypothetical protein [Prochlorococcus marinus str. MIT 9312]	2e-11	gb|ABS83195.1|	Conserved hypothetical protein [Prochlorococcus marinus str. MIT 9312]	7e-06	ref|YP_001009676.1|	hypothetical protein A9601_12851 [Prochlorococcus marinus str. AS9601] ref|YP_001091516.1| hypothetical protein P9301_12921 [Prochlorococcus marinus str. MIT 9301] gb|ABM70569.1| Hypothetical protein A9601_12851 [Prochlorococcus marinus str. AS9601] gb|ABO17915.1| Conserved hypothetical protein [Prochlorococcus marinus str. MIT 9301]	1e-05	gb|ABE10943.1|	hypothetical protein ASNC3046_0024 [uncultured Prochlorococcus marinus clone ASNC3046]	1e-05	ref|YP_001484519.1|	hypothetical protein P9215_13181 [Prochlorococcus marinus str. MIT 9215] gb|ABV50933.1| Hypothetical protein P9215_13181 [Prochlorococcus marinus str. MIT 9215]	7e-05	gb|ABE10919.1|	hypothetical protein ASNC3046_0035 [uncultured Prochlorococcus marinus clone ASNC3046]	0.0002	emb|CAP16445.1|	Conserved hypothetical protein [Prochlorococcus marinus subsp. pastoris str. CCMP1986]	0.0003	gb|ABS83163.1|	Conserved hypothetical protein [Prochlorococcus marinus str. MIT 9312]	0.0003	ref|YP_001484344.1|	hypothetical protein P9215_11431 [Prochlorococcus marinus str. MIT 9215] gb|ABV50758.1| Conserved hypothetical protein [Prochlorococcus marinus str. MIT 9215]	0.0004	ref|YP_001091337.1|	hypothetical protein P9301_11131 [Prochlorococcus marinus str. MIT 9301] gb|ABO17736.1| Conserved hypothetical protein [Prochlorococcus marinus str. MIT 9301]	0.0004	ref|YP_001009505.1|	hypothetical protein A9601_11141 [Prochlorococcus marinus str. AS9601] gb|ABM70398.1| Conserved hypothetical protein [Prochlorococcus marinus str. AS9601]	0.002	ref|NP_892816.1|	possible DnaJ central domain (4 repeats) [Prochlorococcus marinus subsp. pastoris str. CCMP1986] emb|CAE19157.1| possible DnaJ central domain (4 repeats) [Prochlorococcus marinus subsp. pastoris str. CCMP1986]	0.005	ref|YP_001011188.1|	possible DnaJ central domain (4 repeats) [Prochlorococcus marinus str. MIT 9515] gb|ABM72081.1| possible DnaJ central domain (4 repeats) [Prochlorococcus marinus str. MIT 9515]	0.007
IG1412f6	PMED4_15761	GI 5	emb|CAP16502.1|	Conserved hypothetical protein [Prochlorococcus marinus subsp. pastoris str. CCMP1986]	5e-14	ref|YP_001011881.1|	hypothetical protein P9515_15671 [Prochlorococcus marinus str. MIT 9515] gb|ABM72774.1| Conserved hypothetical protein [Prochlorococcus marinus str. MIT 9515]	6e-13	ref|YP_001009661.1|	hypothetical protein A9601_12701 [Prochlorococcus marinus str. AS9601] ref|YP_001091502.1| hypothetical protein P9301_12781 [Prochlorococcus marinus str. MIT 9301] gb|ABM70554.1| Hypothetical protein A9601_12701 [Prochlorococcus marinus str. AS9601] gb|ABO17901.1| Hypothetical protein P9301_12781 [Prochlorococcus marinus str. MIT 9301]	1e-10	ref|YP_001484511.1|	hypothetical protein P9215_13101 [Prochlorococcus marinus str. MIT 9215] gb|ABV50925.1| Hypothetical protein P9215_13101 [Prochlorococcus marinus str. MIT 9215]	4e-10	gb|ABE10910.1|	hypothetical protein ASNC3046_0013 [uncultured Prochlorococcus marinus clone ASNC3046]	1e-09	ref|YP_001014266.1|	hypothetical protein NATL1_04371 [Prochlorococcus marinus str. NATL1A] gb|ABM75001.1| Hypothetical protein NATL1_04371 [Prochlorococcus marinus str. NATL1A]	5e-07	ref|YP_001621509.1|	hypothetical protein PMN2A_1926 [Prochlorococcus marinus str. NATL2A] gb|ABU23862.1| Conserved hypothetical protein [Prochlorococcus marinus str. NATL2A]	5e-06
IG1412f10-11	PMED4_15762	GI 5	NO HIT
IG1412f13-17	PMED4_15771	GI 5	emb|CAP16503.1|	Conserved hypothetical protein [Prochlorococcus marinus subsp. pastoris str. CCMP1986]	8e-23	ref|YP_001011882.1|	hypothetical protein P9515_15681 [Prochlorococcus marinus str. MIT 9515] gb|ABM72775.1| Conserved hypothetical protein [Prochlorococcus marinus str. MIT 9515]	6e-12	ref|YP_001010008.1|	hypothetical protein A9601_16181 [Prochlorococcus marinus str. AS9601] gb|ABM70901.1| Hypothetical protein A9601_16181 [Prochlorococcus marinus str. AS9601]	0.004	ref|YP_001010358.1|	hypothetical protein P9515_00421 [Prochlorococcus marinus str. MIT 9515] gb|ABM71251.1| Hypothetical protein P9515_00421 [Prochlorococcus marinus str. MIT 9515]	0.045
IG1412f30	PMED4_15791	GI 5	emb|CAP16505.1|	Conserved hypothetical protein [Prochlorococcus marinus subsp. pastoris str. CCMP1986]	3e-18	ref|YP_001091805.1|	hypothetical protein P9301_15811 [Prochlorococcus marinus str. MIT 9301] gb|ABO18204.1| Conserved hypothetical protein [Prochlorococcus marinus str. MIT 9301]	1e-13	ref|YP_001011884.1|	hypothetical protein P9515_15701 [Prochlorococcus marinus str. MIT 9515] gb|ABM72777.1| Conserved hypothetical protein [Prochlorococcus marinus str. MIT 9515]	1e-13	ref|YP_001009987.1|	hypothetical protein A9601_15971 [Prochlorococcus marinus str. AS9601] gb|ABM70880.1| Conserved hypothetical protein [Prochlorococcus marinus str. AS9601]	3e-13	gb|ABS83221.1|	Conserved hypothetical protein [Prochlorococcus marinus str. MIT 9312]	4e-13	ref|YP_001621664.1|	hypothetical protein PMN2A_2093 [Prochlorococcus marinus str. NATL2A] gb|ABU24017.1| Conserved hypothetical protein [Prochlorococcus marinus str. NATL2A]	9e-05	ref|YP_001015210.1|	hypothetical protein NATL1_13871 [Prochlorococcus marinus str. NATL1A] gb|ABM75945.1| Hypothetical protein NATL1_13871 [Prochlorococcus marinus str. NATL1A]	9e-05
IG1412f40	PMED4_15792	GI 5	NO HIT
IG1422r3-6	PMED4_15921	GI 5	emb|CAP16400.1|	Hypothetical protein [Prochlorococcus marinus subsp. pastoris str. CCMP1986] emb|CAP16509.1| Conserved hypothetical protein [Prochlorococcus marinus subsp. pastoris str. CCMP1986]	3e-26	ref|YP_398003.1|	protein family PM-15 [Prochlorococcus marinus str. MIT 9312] gb|ABB50567.1| protein family PM-15 [Prochlorococcus marinus str. MIT 9312]	3e-24	ref|YP_001011202.1|	hypothetical protein P9515_08881 [Prochlorococcus marinus str. MIT 9515] gb|ABM72095.1| Hypothetical protein P9515_08881 [Prochlorococcus marinus str. MIT 9515]	4e-24	ref|YP_397726.1|	protein family PM-15 [Prochlorococcus marinus str. MIT 9312] gb|ABB50290.1| protein family PM-15 [Prochlorococcus marinus str. MIT 9312]	1e-21	ref|YP_001009698.1|	hypothetical protein A9601_13071 [Prochlorococcus marinus str. AS9601] ref|YP_001091545.1| hypothetical protein P9301_13211 [Prochlorococcus marinus str. MIT 9301] ref|YP_001484537.1| hypothetical protein P9215_13361 [Prochlorococcus marinus str. MIT 9215] gb|ABE10926.1| putative protein family PM-15 [uncultured Prochlorococcus marinus clone ASNC3046] gb|ABM70591.1| Conserved hypothetical protein…	2e-21	ref|YP_396921.1|	protein family PM-15 [Prochlorococcus marinus str. MIT 9312] gb|ABB49485.1| protein family PM-15 [Prochlorococcus marinus str. MIT 9312]	2e-15	ref|YP_001008874.1|	hypothetical protein A9601_04791 [Prochlorococcus marinus str. AS9601] gb|ABM69767.1| Hypothetical protein A9601_04791 [Prochlorococcus marinus str. AS9601]	1e-13	ref|ZP_01472243.1|	hypothetical protein RS9916_30649 [Synechococcus sp. RS9916] gb|EAU73957.1| hypothetical protein RS9916_30649 [Synechococcus sp. RS9916]	1e-12	ref|YP_001090672.1|	protein family PM-15 [Prochlorococcus marinus str. MIT 9301] gb|ABO17071.1| protein family PM-15 [Prochlorococcus marinus str. MIT 9301]	2e-12	ref|NP_875863.1|	Predicted protein family PM-15 [Prochlorococcus marinus subsp. marinus str. CCMP1375] gb|AAQ00516.1| Predicted protein family PM-15 [Prochlorococcus marinus subsp. marinus str. CCMP1375]	2e-12	ref|YP_291785.1|	hypothetical protein PMN2A_0591 [Prochlorococcus marinus str. NATL2A] ref|YP_001015202.1| hypothetical protein NATL1_13791 [Prochlorococcus marinus str. NATL1A] gb|AAZ58082.1| hypothetical protein PMN2A_0591 [Prochlorococcus marinus str. NATL2A] gb|ABM75937.1| Hypothetical protein NATL1_13791 [Prochlorococcus marinus str. NATL1A]	1e-11	ref|YP_001551327.1|	hypothetical protein P9211_14421 [Prochlorococcus marinus str. MIT 9211] gb|ABX09373.1| Hypothetical protein P9211_14421 [Prochlorococcus marinus str. MIT 9211]	1e-11	ref|NP_897556.1|	hypothetical protein SYNW1463 [Synechococcus sp. WH 8102] emb|CAE07978.1| hypothetical [Synechococcus sp. WH 8102]	2e-11	ref|ZP_01086393.1|	hypothetical protein WH5701_10714 [Synechococcus sp. WH 5701] gb|EAQ73802.1| hypothetical protein WH5701_10714 [Synechococcus sp. WH 5701]	1e-09	ref|YP_381834.1|	hypothetical protein Syncc9605_1530 [Synechococcus sp. CC9605] gb|ABB35279.1| hypothetical protein Syncc9605_1530 [Synechococcus sp. CC9605]	2e-09	ref|ZP_01083975.1|	hypothetical protein WH5701_14651 [Synechococcus sp. WH 5701] gb|EAQ76055.1| hypothetical protein WH5701_14651 [Synechococcus sp. WH 5701]
IG1427r6	PMED4_15981	GI 5	emb|CAP16510.1|	Conserved hypothetical protein [Prochlorococcus marinus subsp. pastoris str. CCMP1986]	9e-22	ref|YP_001010009.1|	hypothetical protein A9601_16191 [Prochlorococcus marinus str. AS9601] gb|ABM70902.1| Conserved hypothetical protein [Prochlorococcus marinus str. AS9601]	1e-16	gb|ABS83231.1|	Conserved hypothetical protein [Prochlorococcus marinus str. MIT 9312]	6e-15	ref|YP_001484834.1|	hypothetical protein P9215_16351 [Prochlorococcus marinus str. MIT 9215] gb|ABV51248.1| Conserved hypothetical protein [Prochlorococcus marinus str. MIT 9215]	5e-14	ref|YP_001091822.1|	hypothetical protein P9301_15981 [Prochlorococcus marinus str. MIT 9301] gb|ABO18221.1| Hypothetical protein P9301_15981 [Prochlorococcus marinus str. MIT 9301]	5e-06
IG1428f2	PMED4_16001	GI 5	emb|CAP16511.1|	Hypothetical protein [Prochlorococcus marinus subsp. pastoris str. CCMP1986]	1e-19	emb|CAP16339.1|	Hypothetical protein [Prochlorococcus marinus subsp. pastoris str. CCMP1986]	2e-14
IG1429r11-19	PMED4_16021	GI 5	emb|CAP16512.1|	Hypothetical protein [Prochlorococcus marinus subsp. pastoris str. CCMP1986]	7e-21	emb|CAP16418.1|	Hypothetical protein [Prochlorococcus marinus subsp. pastoris str. CCMP1986]	1e-07	gb|ABS83189.1|	Conserved hypothetical protein [Prochlorococcus marinus str. MIT 9312]	1e-07	ref|YP_001091503.1|	hypothetical protein P9301_12791 [Prochlorococcus marinus str. MIT 9301] gb|ABO17902.1| Conserved hypothetical protein [Prochlorococcus marinus str. MIT 9301]	2e-07	ref|YP_001009663.1|	hypothetical protein A9601_12721 [Prochlorococcus marinus str. AS9601] gb|ABM70556.1| Hypothetical protein A9601_12721 [Prochlorococcus marinus str. AS9601]	3e-07	gb|ABE10911.1|	hypothetical protein ASNC3046_0015 [uncultured Prochlorococcus marinus clone ASNC3046]	5e-07	ref|YP_001484513.1|	hypothetical protein P9215_13121 [Prochlorococcus marinus str. MIT 9215] gb|ABV50927.1| Hypothetical protein P9215_13121 [Prochlorococcus marinus str. MIT 9215]	4e-06	emb|CAP16334.1|	Hypothetical protein [Prochlorococcus marinus subsp. pastoris str. CCMP1986]	2e-05
IG1429f21-24	PMED4_16031	GI 5	emb|CAP16513.1|	Hypothetical protein [Prochlorococcus marinus subsp. pastoris str. CCMP1986]	1e-32	gb|ABS83109.1|	Conserved hypothetical protein [Prochlorococcus marinus str. MIT 9312]	1e-14	ref|YP_001090623.1|	hypothetical protein P9301_03991 [Prochlorococcus marinus str. MIT 9301] gb|ABO17022.1| Conserved hypothetical protein [Prochlorococcus marinus str. MIT 9301]	3e-13	ref|YP_001008795.1|	hypothetical protein A9601_04001 [Prochlorococcus marinus str. AS9601] gb|ABM69688.1| Hypothetical protein A9601_04001 [Prochlorococcus marinus str. AS9601]	3e-13	emb|CAP16332.1|	Hypothetical protein [Prochlorococcus marinus subsp. pastoris str. CCMP1986]	6e-13	ref|YP_001483607.1|	hypothetical protein P9215_04051 [Prochlorococcus marinus str. MIT 9215] gb|ABV50021.1| Hypothetical protein P9215_04051 [Prochlorococcus marinus str. MIT 9215]	7e-13	ref|YP_001015066.1|	hypothetical protein NATL1_12431 [Prochlorococcus marinus str. NATL1A] gb|ABM75801.1| Hypothetical protein NATL1_12431 [Prochlorococcus marinus str. NATL1A]	4e-09	ref|YP_291707.1|	hypothetical protein PMN2A_0513 [Prochlorococcus marinus str. NATL2A] gb|AAZ58004.1| hypothetical protein PMN2A_0513 [Prochlorococcus marinus str. NATL2A]	4e-09
IG1437r11-16_3	PMED4_16121	GI 5	emb|CAP16514.1|	Hypothetical protein [Prochlorococcus marinus subsp. pastoris str. CCMP1986]	3e-37	ref|YP_001009715.1|	hypothetical protein A9601_13241 [Prochlorococcus marinus str. AS9601] gb|ABM70608.1| conserved hypothetical protein [Prochlorococcus marinus str. AS9601]	2e-30	ref|YP_001484555.1|	hypothetical protein P9215_13541 [Prochlorococcus marinus str. MIT 9215] gb|ABV50969.1| conserved hypothetical [Prochlorococcus marinus str. MIT 9215]	1e-29	gb|ABE11001.1|	conserved hypothetical protein [uncultured Prochlorococcus marinus clone ASNC612]	2e-29	ref|YP_397741.1|	hypothetical protein PMT9312_1246 [Prochlorococcus marinus str. MIT 9312] gb|ABB50305.1| conserved hypothetical protein [Prochlorococcus marinus str. MIT 9312]	2e-29	ref|YP_001011628.1|	hypothetical protein P9515_13141 [Prochlorococcus marinus str. MIT 9515] gb|ABM72521.1| conserved hypothetical protein [Prochlorococcus marinus str. MIT 9515]	3e-29	ref|YP_001091563.1|	hypothetical protein P9301_13391 [Prochlorococcus marinus str. MIT 9301] gb|ABO17962.1| conserved hypothetical protein [Prochlorococcus marinus str. MIT 9301]	6e-29	ref|NP_893266.1|	hypothetical protein PMM1149 [Prochlorococcus marinus subsp. pastoris str. CCMP1986] emb|CAE19608.1| conserved hypothetical [Prochlorococcus marinus subsp. pastoris str. CCMP1986]	1e-28	ref|ZP_01124525.1|	hypothetical protein WH7805_04971 [Synechococcus sp. WH 7805] gb|EAR18116.1| hypothetical protein WH7805_04971 [Synechococcus sp. WH 7805]	4e-13	ref|ZP_01470415.1|	hypothetical protein RS9916_31922 [Synechococcus sp. RS9916] gb|EAU74210.1| hypothetical protein RS9916_31922 [Synechococcus sp. RS9916]	2e-12	ref|YP_001225356.1|	hypothetical protein SynWH7803_1633 [Synechococcus sp. WH 7803] emb|CAK24059.1| Conserved hypothetical protein [Synechococcus sp. WH 7803]	3e-12	ref|YP_001551108.1|	hypothetical protein P9211_12231 [Prochlorococcus marinus str. MIT 9211] gb|ABX09154.1| conserved hypothetical protein [Prochlorococcus marinus str. MIT 9211]	4e-12	ref|ZP_01080706.1|	hypothetical protein RS9917_01512 [Synechococcus sp. RS9917] gb|EAQ68996.1| hypothetical protein RS9917_01512 [Synechococcus sp. RS9917]	6e-12	ref|YP_730124.1|	hypothetical protein sync_0911 [Synechococcus sp. CC9311] gb|ABI47011.1| conserved hypothetical protein [Synechococcus sp. CC9311]	7e-11	ref|YP_291951.1|	hypothetical protein PMN2A_0757 [Prochlorococcus marinus str. NATL2A] gb|AAZ58248.1| conserved hypothetical protein [Prochlorococcus marinus str. NATL2A]	7e-11	ref|NP_896781.1|	hypothetical protein SYNW0688 [Synechococcus sp. WH 8102] emb|CAE07203.1| conserved hypothetical [Synechococcus sp. WH 8102]
IG1437r11-16_2	PMED4_16122	GI 5	ref|YP_214656.1|	hypothetical protein PSSM4_095 [Cyanophage P-SSM4] gb|AAX46896.1| hypothetical protein PSSM4_095 [Cyanophage P-SSM4]	4e-22
IG1437r11-16_1	PMED4_16131	GI 5	emb|CAP16515.1|	Hypothetical protein [Prochlorococcus marinus subsp. pastoris str. CCMP1986]	4e-24	emb|CAP16384.1|	Hypothetical protein [Prochlorococcus marinus subsp. pastoris str. CCMP1986]	1e-17	ref|YP_001091457.1|	hypothetical protein P9301_12331 [Prochlorococcus marinus str. MIT 9301] gb|ABO17856.1| Hypothetical protein P9301_12331 [Prochlorococcus marinus str. MIT 9301]	0.005
IG1438r5	PMED4_16161	GI 5	emb|CAP16517.1|	Hypothetical protein [Prochlorococcus marinus subsp. pastoris str. CCMP1986]	6e-13	ref|YP_001011539.1|	hypothetical protein P9515_12251 [Prochlorococcus marinus str. MIT 9515] gb|ABM72432.1| Hypothetical protein P9515_12251 [Prochlorococcus marinus str. MIT 9515]	4e-11	gb|ABS83182.1|	Conserved hypothetical protein [Prochlorococcus marinus str. MIT 9312]	9e-08	ref|YP_001009637.1|	hypothetical protein A9601_12461 [Prochlorococcus marinus str. AS9601] gb|ABM70530.1| Hypothetical protein A9601_12461 [Prochlorococcus marinus str. AS9601]	2e-06
IG1442f4	PMED4_16202	GI 5	NO HIT
IG1451f8-15	PMED4_16312	GI 5	ref|YP_001008453.1|	hypothetical protein A9601_00581 [Prochlorococcus marinus str. AS9601] gb|ABM69346.1| Hypothetical protein A9601_00581 [Prochlorococcus marinus str. AS9601]	7e-16	gb|ABE10877.1|	hypothetical protein ASNC2259_0035 [uncultured Prochlorococcus marinus clone ASNC2259]	3e-15	ref|YP_001090282.1|	hypothetical protein P9301_00581 [Prochlorococcus marinus str. MIT 9301] gb|ABO16681.1| Hypothetical protein P9301_00581 [Prochlorococcus marinus str. MIT 9301]	5e-15
IG1451r5-8	PMED4_16321	GI 5	emb|CAP16520.1|	Hypothetical protein [Prochlorococcus marinus subsp. pastoris str. CCMP1986]	2e-34
IG1738r2	PMED4_19191		emb|CAP16525.1|	Conserved hypothetical protein [Prochlorococcus marinus subsp. pastoris str. CCMP1986]	5e-28	ref|YP_001012213.1|	hypothetical protein P9515_18991 [Prochlorococcus marinus str. MIT 9515] gb|ABM73106.1| Conserved hypothetical protein [Prochlorococcus marinus str. MIT 9515]	6e-20
[truncated: 58 more columns]
